# Multi-fluorescence high-resolution episcopic microscopy (MF-HREM) for three dimensional imaging of adult murine organs

Claire Walsh<sup>1</sup>, Natalie Holroyd<sup>1</sup>, Eoin Finnerty<sup>1</sup>, Sean G. Ryan<sup>2</sup>, Paul W. Sweeney<sup>3,4</sup>,  
Rebecca J. Shipley<sup>4</sup>, Simon Walker-Samuel<sup>1</sup>.

1. Centre for Advanced Biomedical Imaging, University College London, 72 Huntley Street, London, WC1E 6DD, UK. 2. School of Physics, Astronomy and Mathematics, University of Hertfordshire, College Lane, Hatfield, AL10 9AB, UK. 3. Cancer Research UK Cambridge Institute, University of Cambridge, Li Ka Shing Centre, Cambridge, CB2 0RE, UK 4. Department of Mechanical Engineering, University College London, London, UK

## Abstract

Three-dimensional microscopy of large biological samples ( $>0.5 \text{ cm}^3$ ) is transforming biological research. Many existing techniques require trade-offs between image resolution and sample size, require clearing or use optical sectioning. These factors complicate the implementation of large volume 3D imaging. Here we present Multi-fluorescent High Resolution Episcopic Microscopy (MF-HREM) which allows 3D imaging of large samples without the need for clearing or optical sectioning. MF-HREM uses serial-sectioning and block-facing wide-field fluorescence, without the need for tissue clearing or optical sectioning. We detail developments in sample processing including stain penetration, resin embedding and imaging. In addition, we describe image post-processing methods needed to segment and further quantify these data. Finally, we demonstrate the wide applicability of MF-HREM by: 1) quantifying adult mouse glomeruli. 2) identifying injected cells and vascular networks in tumour xenograft models; 3) quantifying vascular networks and white matter track orientation in mouse brain.

## Introduction

Immunohistochemistry has traditionally been the primary method used to image specific proteins and structures in large ( $>1\text{cm}^3$ ) tissue samples. However, the two-dimensional nature of conventional histological slices means that the complete, and often complex, three-dimensional structure of biological tissues generally cannot be captured and investigated. Numerous efforts have been made to simplify the three-dimensional (3D) alignment of serial histological sections, but have proved to be non-trivial due to the significant distortions and misalignments that occur during sectioning and processing (1). To meet this need, several 3D fluorescent imaging techniques have been developed that are now providing data over length scales from single cells to tissues, organs and organisms (2).

As with many fluorescent imaging techniques, multiplexed fluorescence staining is a particularly powerful tool for evaluating spatial relationships between features, often enabling function to be inferred (3–5).

All 3D microscopy techniques must overcome the opacity of biological tissue caused by optical scatter of tissue structures. Approaches to this can be grouped into two categories: clearing-based, where the tissue is rendered optically transparent through de-lipidation and refractive index matching (6–8)(9); and serial sectioning, where the entire sample is physically cut.

44

45 Cleared samples can be imaged using techniques such as light-sheet microscopy (2,4,7)  
46 and optical projection tomography (OPT) (10,11). However, clearing requires often complex,  
47 lengthy and costly tissue preparation, with variable efficacy (9,12), and widely acknowledged  
48 morphological changes to the sample (9,13). Additionally, sample size is limited by the  
49 working distance of the microscope objective lens (7) and the objective lens must be  
50 protected from the often corrosive clearing solutions. Resolution is also limited by the need  
51 for broader light sheets to penetrate greater tissue depth (14).

52

53 Block facing serial sectioning, overcomes slice alignment issues by imaging the surface of  
54 the exposed sample after each successive cut thereby creating an inherently aligned image  
55 stack and removing the need to retain the structural integrity of individual slices. However,  
56 block-face imaging can suffer from loss of optical resolution in the z-axis, due to  
57 contamination by out of focus light from below the block surface (shine-through) (15). The  
58 addition of optical-sectioning capabilities such as two-photon and structured illumination into  
59 serial sectioning instruments has aimed to overcome this issue (3), (14), (16) (13,17), but at  
60 the cost of dramatically increasing the technical requirements for the imaging instrument  
61 require high powered lasers and often they are custom built.

62

63 Optical HREM was originally developed as a high-throughput platform for phenotyping  
64 transgenic mouse models (18–20). It was subsequently used to map gene expression (via  
65 lacZ) (21), and for analysis of human tissue (22,23). In these studies, the source of image  
66 contrast was eosin blocking (i.e. the property of eosin, when bound to eosinophilic proteins,  
67 to inhibit the fluorescence of unbound eosin in the embedding resin). This produces images  
68 with an appearance similar to the inverse of a traditional eosin staining in histology (shown in  
69 Figure 1C). Previously, studies have also embedded samples in (non-fluorescent) resin and  
70 used the native autofluorescence of the tissue as a source of contrast (20). This technique  
71 has only been published as applied to mouse embryos and has no potential to target specific  
72 structures or multiplex stains (shown in Figure 1C). Moreover, the resolution is far coarser  
73 than Eosin stained HREM as no post-processing solutions to recover the axial resolution  
74 have been developed (24).

75 Here, we describe the development of *multi-fluorescent* high resolution episcopic  
76 microscopy (MF-HREM), which allows multiplexed fluorescent imaging of large tissue  
77 samples, at high resolution, without the need to perform tissue clearing or optical sectioning.  
78 MF-HREM is a block-facing serial sectioning imaging technique (21,25), in which samples  
79 are embedded in resin and sectioned within the body of a microscope using an automated  
80 microtome blade. Wide-field multi-channel fluorescent images of the block face are acquired  
81 after every section, resulting in an inherently aligned stack of 3D fluorescent images.

82 MF-HREM offers a convenient solution to the difficulties associated with the alignment of  
83 traditional histological sections, and has enabled, for the first time, the extension of HREM to  
84 provide multiplexed fluorescence images with targeted labelling. This included the  
85 development of a MF-HREM tissue-processing, acquisition and post-processing pipeline,  
86 with the use of an opacifying agent and image deconvolution to recover axial image  
87 resolution. As MF-HREM does not need tissues to be optically cleared, it is advantageous  
88 for imaging tissue morphology (13) and can be used in conjunction with lipophilic dyes that  
89 cannot be used in solvent based clearing (26,27). For MF-HREM, lateral resolution is  
90 determined directly by the microscope objective, while axial resolution is related to both  
91 section thickness and light penetration into the block. As the block is physically sliced there

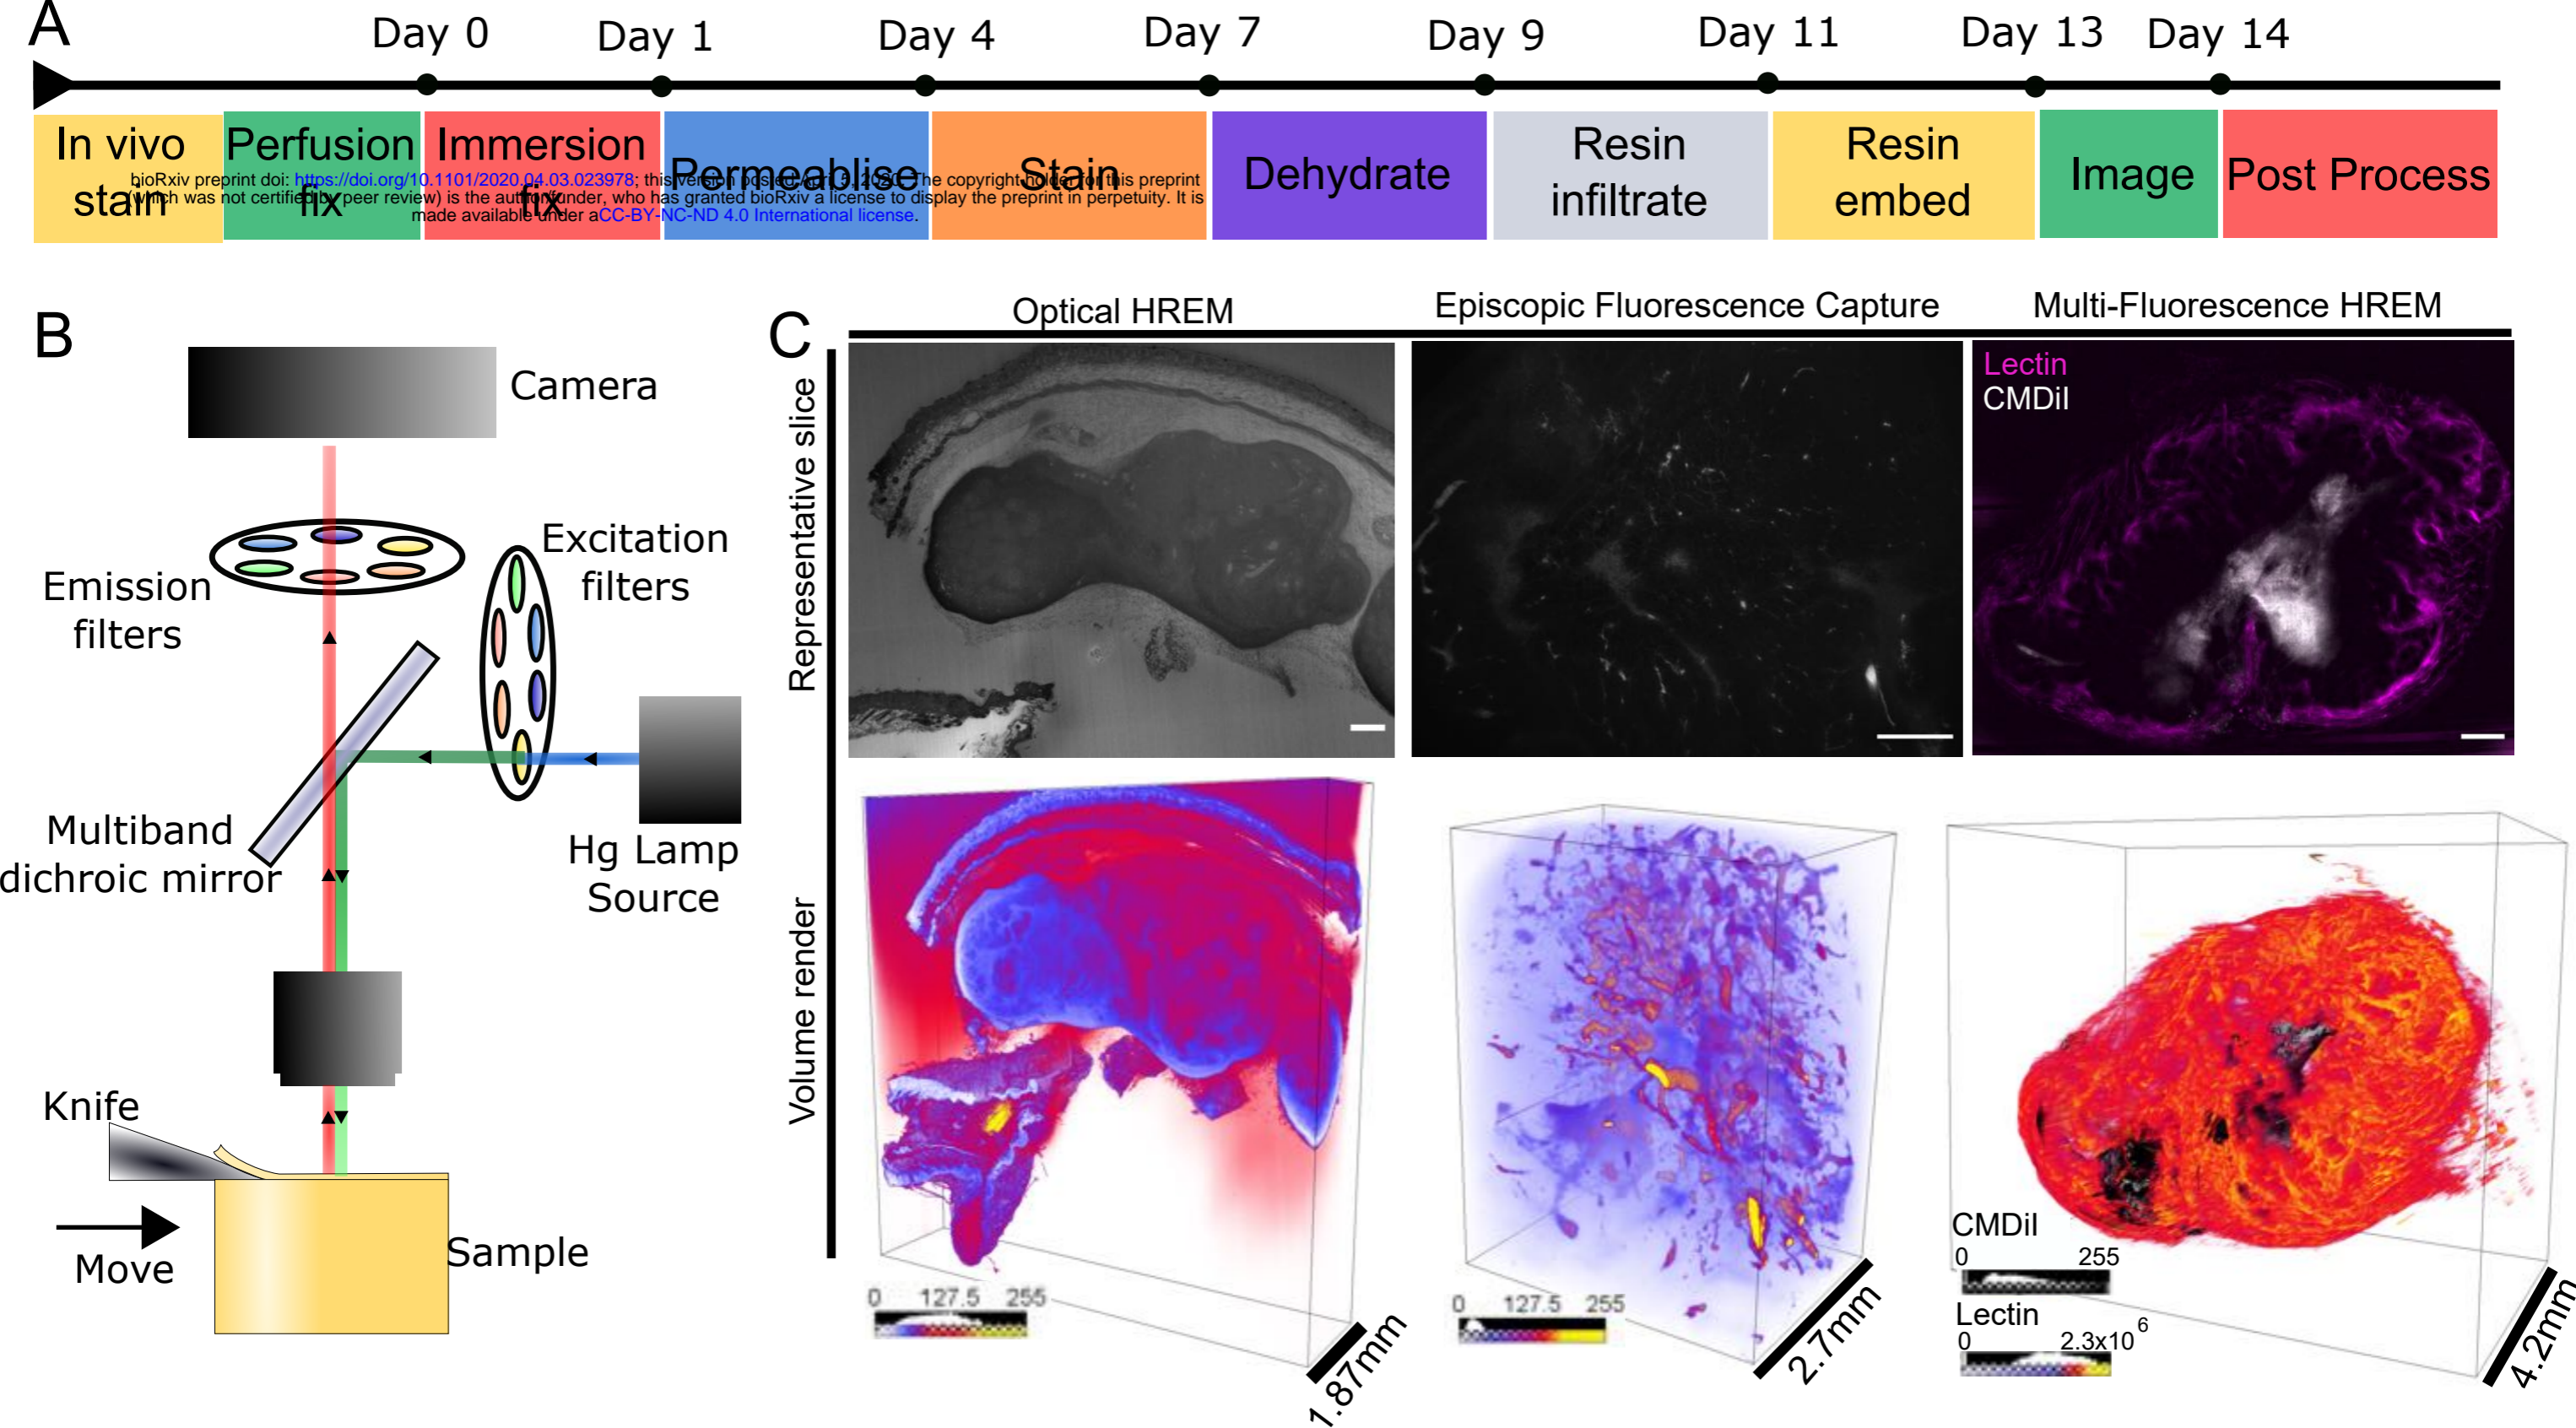

Figure 1. The MF-HREM acquisition pipeline. A) Shows the MF-HREM sample preparation, acquisition and image post-processing timeline for a typical multi-stained sample. For animal models, the sample is collected following perfusion fixation. In some cases the sample is collected following perfusion fixation, in some cases the sample is stained in vivo, prior to fixation. The sample is fixed overnight in PFA before being whole-mount stained (small mount stain or antibody). As almost all candidate resins are immiscible with water, samples must be dehydrated before polymerisation. Once staining is complete, the sample is dehydrated using a series of organic solvents, followed by infiltration with a three-part glycol methacrylate acrylic (GMA) resin. Finally, the sample is set within the final resin block in the desired orientation and attached to a chuck for mounting to the instrument. Sample imaging with multiple wavelength channels is automated. B) The HREM instrument consists of a fluorescent stereomicroscope with 1x objective lens (NA:0.25), and a variable zoom which provides fields of view ranging from 25 mm down to 2.3 mm. Biological samples are held within a removable sample holder under the microscope objective on a z-translational stage to enable sections to be cut with a horizontally-aligned, automated sectioning blade. Single-use tungsten carbide blades allow large samples to be cut. The sample is illuminated by a mercury vapour lamp, with separate excitation and emission filters for multiple wavelength imaging. C) Comparison of previously developed optical HREM, Episcopic fluorescent microscopy and MF-HREM on subcutaneously grown xenograft colorectal cancer tumours. Optical HREM uses Eosin B for contrast, Episcopic fluorescent microscopy uses tissue autofluorescence, while MF-HREM has used multiplexed staining of tumour vasculature and injected cells. In the case of Optical HREM, it is difficult to definitively identify any particular tumour features due to the widespread binding of Eosin B. In the autofluorescence case, blood has been left in the tumour to enhance vessel autofluorescence; whilst this appears to have been effective, it is difficult to conclusively identify bright structures and blood vessels, and only one fluorescence channel can be imaged. MF-HREM demonstrates clear vascular structure as stained by i.v administered lectin and initially injected cells can be clearly identified via the medium-term cell tracing dye CMDiI. Scale bars are 500 $\mu$ m on 2D slices.

92 is no inherent link between sample depth and resolution. A schematic diagram of the MF-  
93 HREM pipeline is shown in Figure 1.

94 Having developed a pipeline for preparing samples, acquiring data and image post-  
95 processing (Figure 1) we then used MF-HREM to investigate the structure of three biological  
96 systems: 1) glomeruli in adult mouse kidneys; 2) blood vessels in a mouse tumour xenograft  
97 model; and 3) cerebral vasculature and white matter tract orientation in a mouse brain.  
98 We show here that these developments greatly broaden the potential applications of HREM  
99 and provide a large-volume 3D imaging platform that is accessible to a wide range of  
100 researchers.

101

102

103

## 104 **Results**

105

### 106 **Comparison of embedding resins for MF-HREM**

107 MF-HREM requires samples to be embedded within a hard resin, to provide mechanical  
108 stability (stiffness) during sectioning. Various commercially-available resins are used in  
109 histology, however as these resins are designed to be manually cut and subsequently  
110 stained, they are not optimised for automated, thin sectioning, fluorescence preservation or,  
111 in many cases, large samples (28,29). We selected five commercial resins based on the  
112 literature which covered the three broad chemical categories for hard resins: methacrylate  
113 resins - Technovit 7100, Technovit 8100 and Lowicryl HM20; epoxy resin – Spurr; and  
114 arcylic resins – LR White (28,30–32).

115 For each resin chemical setting options rather than heat or UV were used (see methods for  
116 more details). For resins requiring low oxygen to set (Technovit 8100) both setting under  
117 vacuum and setting under a mineral oil layer were investigated (see methods for further  
118 details).

119 Resins were initially assessed for the time taken to set with and without an opacifying agent  
120 Orasol Black (see Supplementary table). LR White and Lowicryl HM20 were excluded from  
121 further testing due to expansion during setting and slow setting (>120 hrs) respectively.

122 For the remaining resins — Technovit 8100, 7100 and Spurr — automated cutting  
123 consistency and image quality were assessed. During automated cutting with the HREM,  
124 Spurr blocks either chipped or broke. Comparisons of cut quality with embedded tissue for  
125 Technovit 7100 and 8100 showed Technovit 7100 to have an increased incidence of ‘flaky’  
126 resin (i.e. where resin had not fully set in the centre of the block or voids were evident) (see  
127 Figure 2B).

128 Hardness testing of Technovit 8100 (oil or vacuum), 7100 and Spurr (Figure 2A) showed  
129 that the top of the block was less hard than the centre of the block for all resins. For  
130 Technovit 8100 blocks were harder when set with vacuum by comparison to mineral oil. It  
131 was also notable that Spurr resin demonstrated a gradient of hardness from the edge of the  
132 section to the centre.

133 Based on the above results Technovit 8100 was chosen as the candidate resin and the final  
134 stage of resin optimisation focused on quantifying and tuning the properties of Technovit  
135 8100 based on the amount of secondary catalyst and Orasol Black (see Figure 2C).

136 Increasing the volume of secondary catalyst or decreasing the concentration of opacifying  
137 agent significantly increased hardness (Two-way anova  $p=0.0059$  for secondary catalyst  
138  $p=0.0011$  for opacifying agent concentration.)

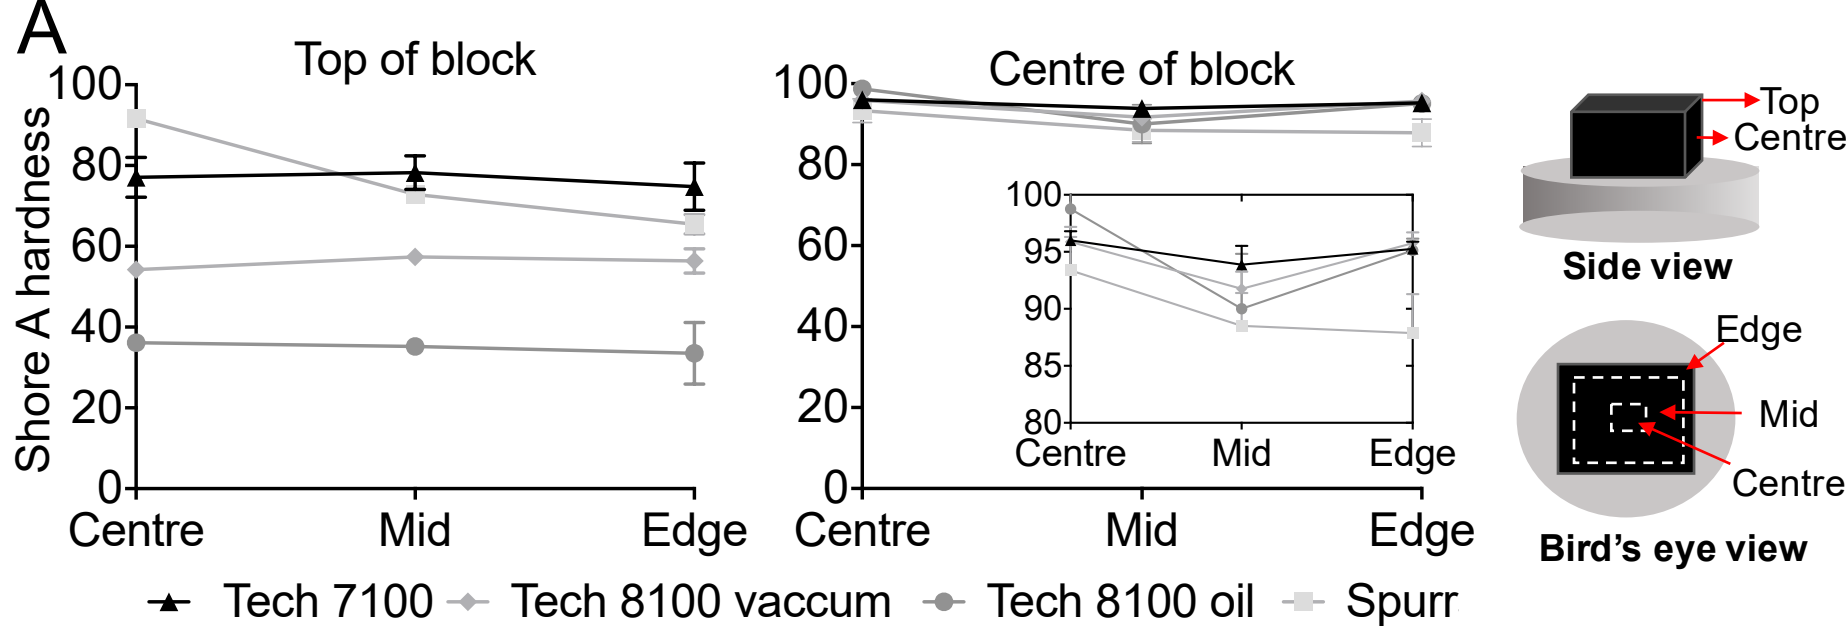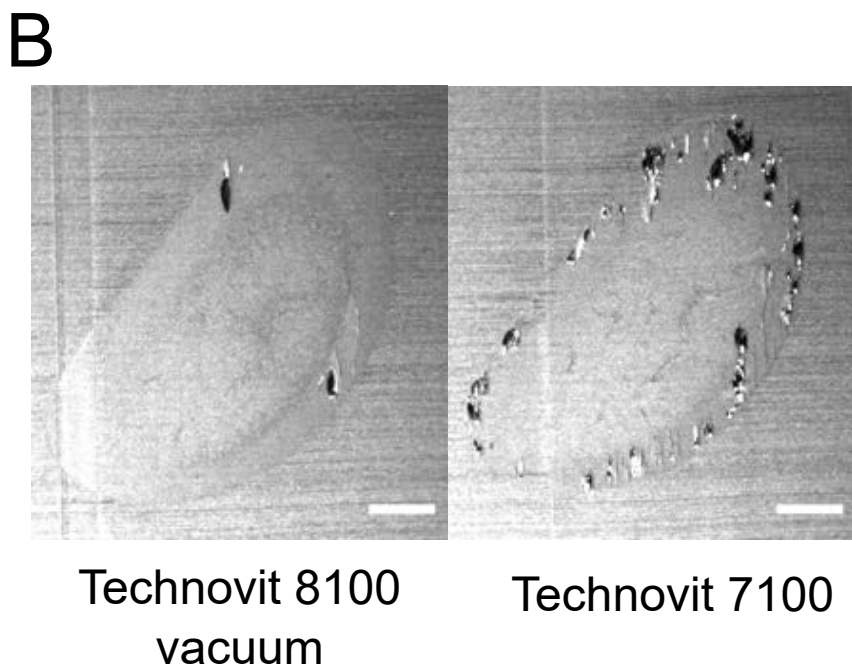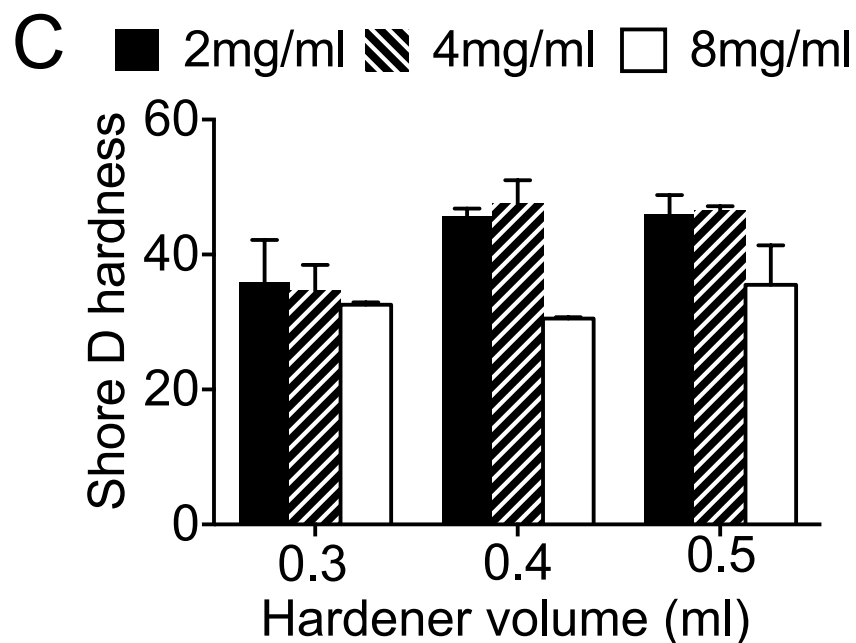

Figure 2. Characterisation of potential resins and optimisation of embedding procedure. A) Hardness measurements for 3 candidate resins (Technovit 7100, Technovit 8100 and Spurr with Technovit 8100 under two different oxygen exclusion conditions: oil or vacuum. Hardness measurements were made using a Shore Durometer A at two axial positions: top and centre, and at 3 lateral positions: centre, mid and edge (as indicated in the diagram). Mean and standard deviation for triplicate measurements on N=2 shown. Comparing the two graphs show that all samples had greater hardness at the centre of the block than the top of the block and at each axial position there was a gradient of decreasing hardness for Spurr resin from the centre to the edge. Technovit 8100 set under oil had the lowest hardness at the top of the block but in the centre all resins had similar measured hardness. B) Representative images of two samples embedded in Technovit 8100 and Technovit 7100, showing the flaky resin/voids that are encountered more so for Technovit 7100 (scale bar =1mm). C) Hardness measurements for Technovit 8100 set under vacuum with three different amounts of secondary catalyst (0.3, 0.4 or 0.5 mL per 15 mL of infiltration soln.) and Orasol Black (2,4,8 mg/mL). Hardness was measured on the top of the block (axially) and in the centre of the block (laterally), mean and standard deviation for triplicate measurements on N=2, shown. Results show a significant increase in hardness with increasing secondary catalyst and decreasing concentration of Orasol Black (two-way anova  $p=0.0059$  for secondary catalyst  $p=0.0011$  for opacifying agent concentration.)

| Reagent                               | Embryo (upto E12.5)<br>Organoid or 3D culture | Small adult organ e.g.<br>nerve, mammary gland,<br>brain hemisphere<br>or embryo E14.5 to P1 | Large adult mouse organ<br>Heart, Liver, Kidney, Whole<br>brain, subcutaneous<br>tumour, lung | Human biopsy material<br>(greater than 1.5 cm <sup>3</sup> )<br>OR highly fibrous tissue |
|---------------------------------------|-----------------------------------------------|----------------------------------------------------------------------------------------------|-----------------------------------------------------------------------------------------------|------------------------------------------------------------------------------------------|
| Acetone 50%                           | 1hr                                           | 6hrs                                                                                         | 12hrs                                                                                         | 24 hrs (refresh at 12hrs)                                                                |
| Acetone 70%                           | 1hr                                           | 6hrs                                                                                         | 24hrs (refresh at 12hrs)                                                                      | 24 hrs (refresh at 12hrs)                                                                |
| Acetone 80%                           | 1hr                                           | 2hrs                                                                                         | 2hrs                                                                                          | 12hrs (refresh at 6hrs)                                                                  |
| Acetone 100%                          | 15mins                                        | 1hr                                                                                          | 2hrs                                                                                          | 3hrs                                                                                     |
| Acetone 100%                          | 15 mins                                       | 1hr                                                                                          | 2hrs                                                                                          | 3hrs                                                                                     |
| Acetone 100%                          | 15mins                                        | 1hr                                                                                          | 2hrs                                                                                          | 3hrs                                                                                     |
| 50:50 Acetone : infiltration<br>sol.  | 2hrs                                          | 12hrs                                                                                        | 12hrs                                                                                         | 24hrs                                                                                    |
| 25:75 Acetone : Infiltration<br>sol.  |                                               | 12hrs                                                                                        | 12hrs                                                                                         | 24hrs                                                                                    |
| 100% Infiltration solution<br>+vacuum | 2hrs<br>include opacifying agent              | 12hrs<br>include opacifying agent                                                            | 24hrs (refresh at 12 hrs) include<br>opacifying agent at sol. refresh                         | 48hrs (refresh at 24hrs)<br>include opacifying agent at<br>sol. refresh                  |
| Embed                                 | 24hrs                                         | 24hrs                                                                                        | 48hrs                                                                                         | 48hrs                                                                                    |

Table 1. Outlining the dehydration and embedding times, optimised for a variety of tissue sample types.

139 Based on these results, embedding protocols for various adult murine tissues, in Technovit  
140 8100, were established and are shown in Table 1.

141

142

### 143 **Minimisation of shine-through artefact with an opacifying agent**

144 In MF-HREM, the focal plane of the microscope is the block surface, however when  
145 excitatory light is incident on the block surface some light penetrates the block and excites  
146 fluorophores deeper in the sample. Emission from these fluorophores beneath the surface is  
147 captured as out of focus light and blurs the image particularly in the axial plane. This is the  
148 same process which causes blurring for any optical imaging of thick samples, the difference  
149 for HREM (and any other serial sectioning block facing technique) being that this light comes  
150 only from below the focal plane rather than above and below (see Figure 3A). This leads to a  
151 characteristic comet-tail like artefact in the axial imaging plane as seen in Figure 3B.

152 To reduce excitation of fluorophore beneath the block surface, we investigated the addition  
153 of an opacifying agent (Orasol Black) to the embedding resin to minimise light transmission  
154 through the block.

155 Orasol Black 45X (Stort Chemicals Ltd, Bishops Stortford, UK) is a carbon-based product  
156 used as a dye in printing industries. It was found to be soluble in all resins and organic  
157 solvents tested and did not affect the expected staining pattern for any tested stains. The  
158 powder was mixed with the resin at the last stage of resin infiltration, prior to positioning and  
159 setting the sample within the final block. Once in the block, the dye decreases shine-through  
160 by absorbing both incident, excitation light and emitted fluorescence beneath the block's  
161 surface.

162 The transmission spectrum of a relatively low concentration of Orasol Black (see Methods) is  
163 shown in Figure 3C. It has a broad absorption in the 450nm to 650nm range, with a steep  
164 increase in transmission in the near infrared range (>700nm).

165 We investigated the decrease in shine-through with increasing Orasol Black concentration at  
166 a wavelength of 705nm and 600nm, using 3D cell cultures as standardised samples  
167 (Figure 3B). Analysis of pixel intensity for ROI's drawn around isolated cells allowed fitting of  
168 a single exponential decay model (Eq. 1) to the z distance-intensity plot (Figure 3D).  
169 estimation of the fit parameters – decay constant ( $\tau$ ), initial intensity ( $I_0$ ) and the calculation  
170 of the half-value layer  $T_{1/2} = -\log(2) / \tau$ , could then be calculated as well as goodness-of-  
171 fit.

$$172 \quad I = I_0 e^{-z/\tau} \quad (\text{Eq. 1})$$

173

174 With increasing concentration of Orasol Black, the comet tail artefact appeared reduced and  
175 can be quantified by the decrease in both  $\tau$  and  $T_{1/2}$  (see Figure 3E). The initial intensity  $I_0$   
176 also shows a sharp decrease at 8mg/ml, and this can be seen qualitatively in the images as  
177 a decrease in the signal and a reduced signal to noise ratio.

178 The highest Orasol Black concentration (32 mg/ml) provided the greatest decrease in shine-  
179 through, but as previously discussed this affected resin polymerisation, causing the resin to  
180 set quickly, in some cases, prior to the addition of the secondary catalyst. A balance  
181 between minimising shine-through, having good signal to noise and optimum resin setting  
182 must therefore be found.

183 As expected from the transmission spectrum, shine-through was lower for HCS Cell Mask  
184 (Em 600 nm) than for HCS Nuclear Mask (Em 705 nm), for the same concentration of  
185 Orasol Black (Figure 3F).

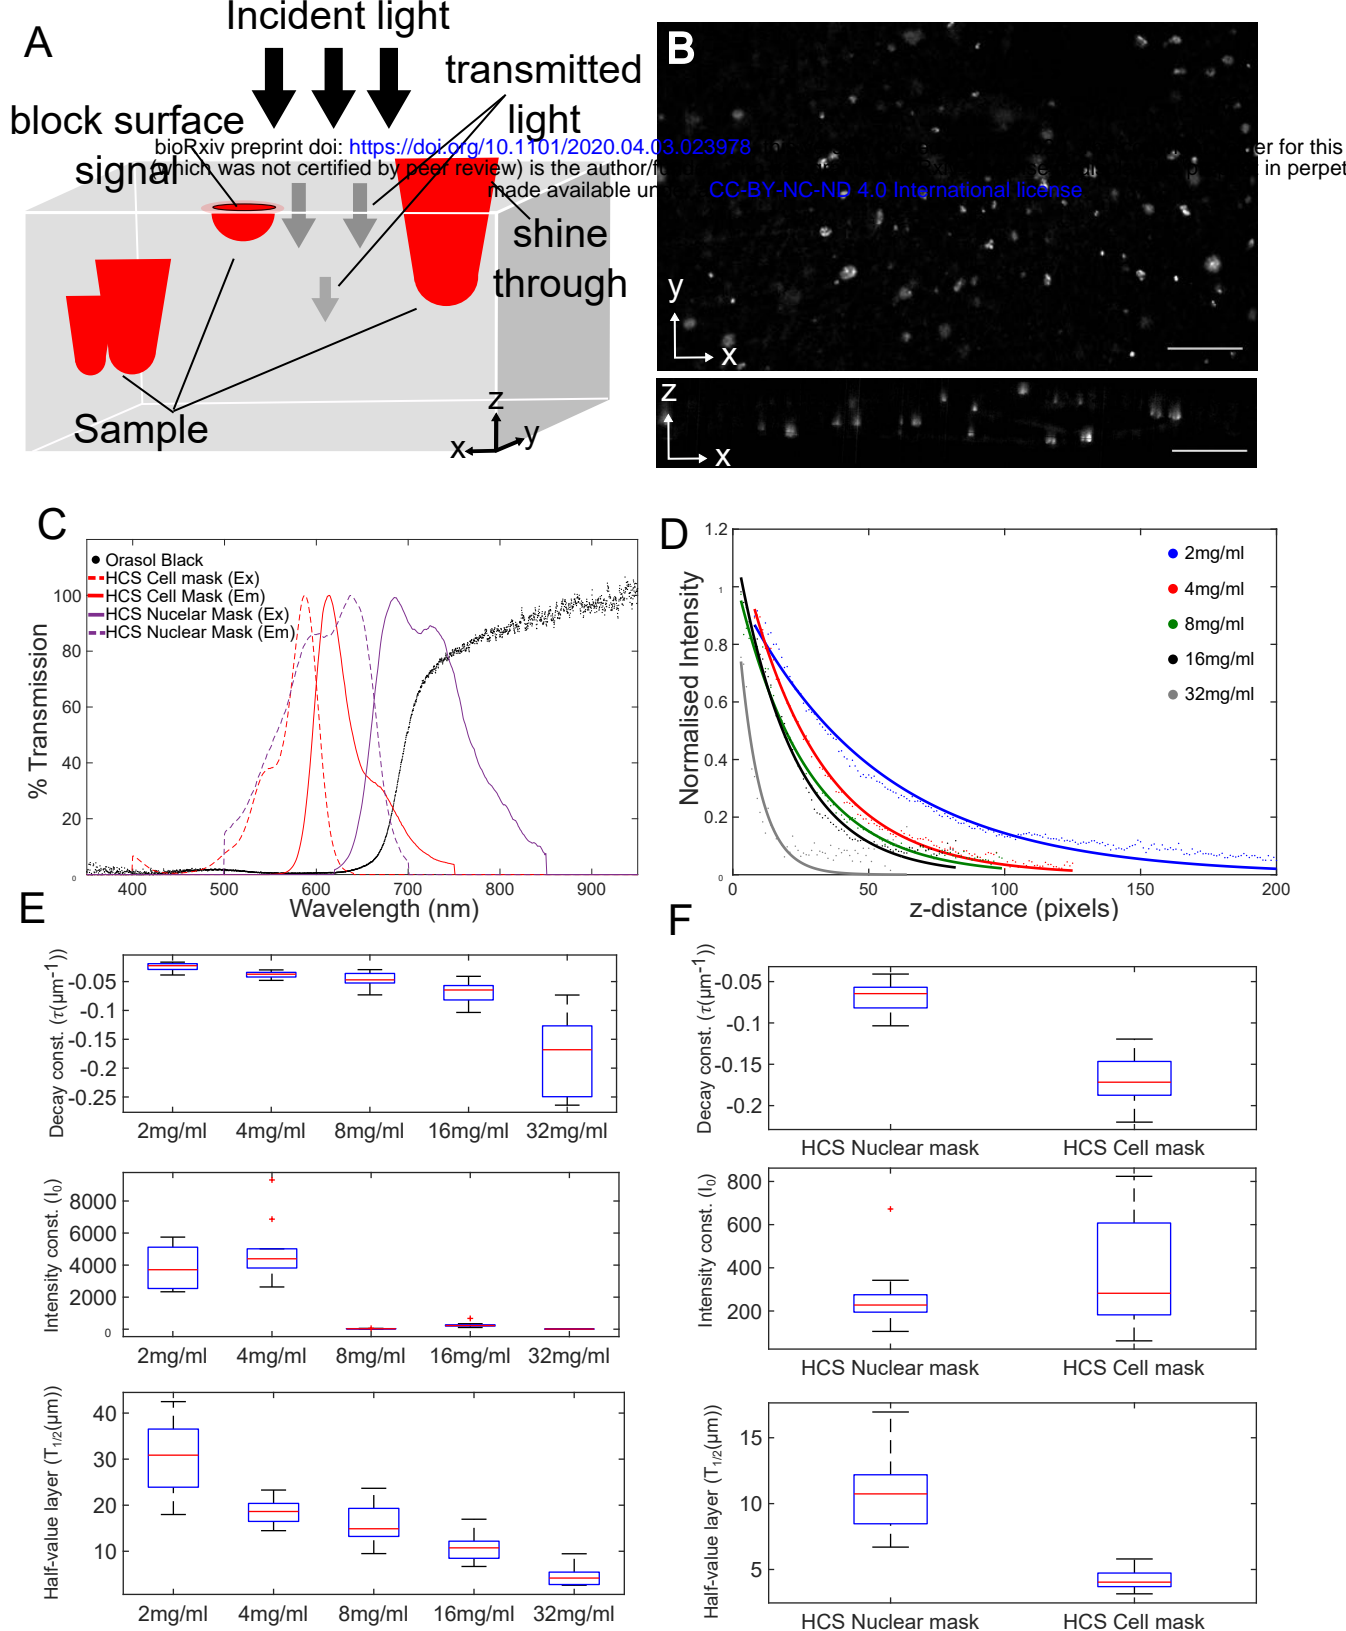

**Figure 3. Characterisation of Orasol black as an opacifying agent to reduce shine-through.** A) Diagram demonstrating the origin of shine through. B) Showing a representative image of cells in an in vitro 3D culture stained with HCS Nuclear Mask with 16mg/ml of Orasol Black. The comet tail artefact can be seen in the xz plane image, (scale bar is 100  $\mu\text{m}$ ). C) Graph showing the measured transmission spectrum of Orasol Black, as well as two tested commercial stains HCS Nuclear Mask and HCS Cell Mask (spectrum from manufacturer). It can be seen that Orasol Black has low transmission in the 400-625 nm range which rises steeply in the 625-700 nm range. The HCS Cell mask spectrum falls almost entirely within the low transmission band of Orasol Black whereas the emission of HCS Nuclear mask falls in the section of steep increase in transmission. D) Showing a single exponential fit to the mean intensity profiles for 10 xz plane ROIs taken of single cells in 3D in vitro cell culture stained with HCS Nuclear Mask of increasing Orasol Black concentration (2,4,8,16,32 mg/ml) R2 values (0.976,0.994,0.989,0.982,0.803) respectively. E) Values of, exponential decay constant ( $\tau$ ), initial intensity ( $I_0$ ), and half-value layer ( $T_{1/2}$ , in microns) are shown for each of the concentrations and show the expected increase in decay constant and half-value layer with increasing Orasol Black concentration. There is also a large decrease in intensity at 8 mg/ml and higher Orasol Black concentrations. F) Shows the same fitting parameters in a comparison between HCS Cell Mask stained sample and HCS Nuclear mask stained sample at 16 mg/ml Orasol Black. As expected from the transmission spectrum the decay constant and half-value layer are smaller in the HCS Cell Mask case than the HCS Nuclear Mask case.



186

## 187 **Minimisation of shine-through artefact with image deconvolution**

188 To further eliminate shine-through, and maximise the multiplexing potential in MF-HREM, we  
189 investigated post-processing strategies to deconvolve the collected signal.

190 For any image,  $I(x,y,z)$ , we may write:

191

$$192 \quad I(x, y, z) = O(x, y, z) * h(x, y, z) + n(x, y, z) \quad (\text{Eq. 2})$$

193

194 where  $O(x,y,z)$  the object, is convolved with a point-spread function (PSF),  $h(x,y,z)$ , and  
195 additive noise,  $n(x,y,z)$ .

196 If the PSF is known and the noise well-estimated the original image can be calculated. The  
197 PSF may be: experimentally measured using sub-resolution fluorescent beads, synthetically  
198 generated it from known system parameters or estimated via blind deconvolution methods  
199 (33).

200 Deconvolution has traditionally been applied to widefield or confocal microscopy where light  
201 contamination comes from both above and below the focal plane. For MF-HREM, only light  
202 below the focal plane contaminates the image. Thus, the PSF is highly asymmetric, and not  
203 well estimated by blind deconvolution techniques or synthetically generated from widely  
204 used models. Whilst experimentally measuring the PSF is an option (15), the process is  
205 time-consuming and sometimes impossible, as it must be acquired for all wavelengths and  
206 magnifications and depends upon having high signal-to-noise ratio with small point-like  
207 sources and high similarity between the PSF measuring sample and the actual sample.  
208 This is impracticable for many MF-HREM experiments and hence we have used small  
209 structures from within the image stack to parameterise a synthetically generated PSF. As  
210 opposed to directly using the extracted PSF from the image we use the small object to  
211 parameterise a symmetric synthetic PSF, using either Gaussian or diffraction kernels  
212 (dependent on the magnification). Zeroing the lower half of these synthetic PSFs then  
213 provided a good PSF estimation for deconvolution with high signal to noise ratio. The  
214 approach was successfully applied to a number of image stacks at different magnifications,  
215 wavelengths and concentrations of Orasol Black. Figures 4B and 4C show the approach for  
216 Gaussian kernel extraction and deconvolution for a small section of brain microvasculature,  
217 with a diffraction kernel.

218

## 219 **Pre-processing to improve signal to noise**

220 The Richardson-Lucy algorithm used to deconvolve the image stacks requires high signal-to-  
221 -noise ratio for effective deconvolution. Previous researchers have used pre-processing  
222 techniques to remove background and reduce noise prior to deconvolution, and this was  
223 found to be an important step to achieve effective deconvolution for MF-HREM images (34).

224 The pre-processing methods chosen were motivated by the importance to have processing  
225 that could be efficiently applied to large image stacks (>20GB). Median filtering with (1 pixel  
226 neighbourhood) was used to remove salt and pepper noise and background subtraction via  
227 a rolling-ball algorithm (35,36) was used to remove background from autofluorescence.

228 In addition to these two steps, spectral unmixing was performed for multiplexed staining,  
229 prior to deconvolution.

230 Multiplexing fluorescent stains relies on having distinct spectral excitations and emissions,  
231 and appropriate microscope filters to differentiate them. In practice, owing to the broad  
232 wavelengths over which most fluorophores are excited and emit and the imperfect nature of  
233 bandpass filters, spectral cross-talk will occur. Spectral unmixing may be used to effectively

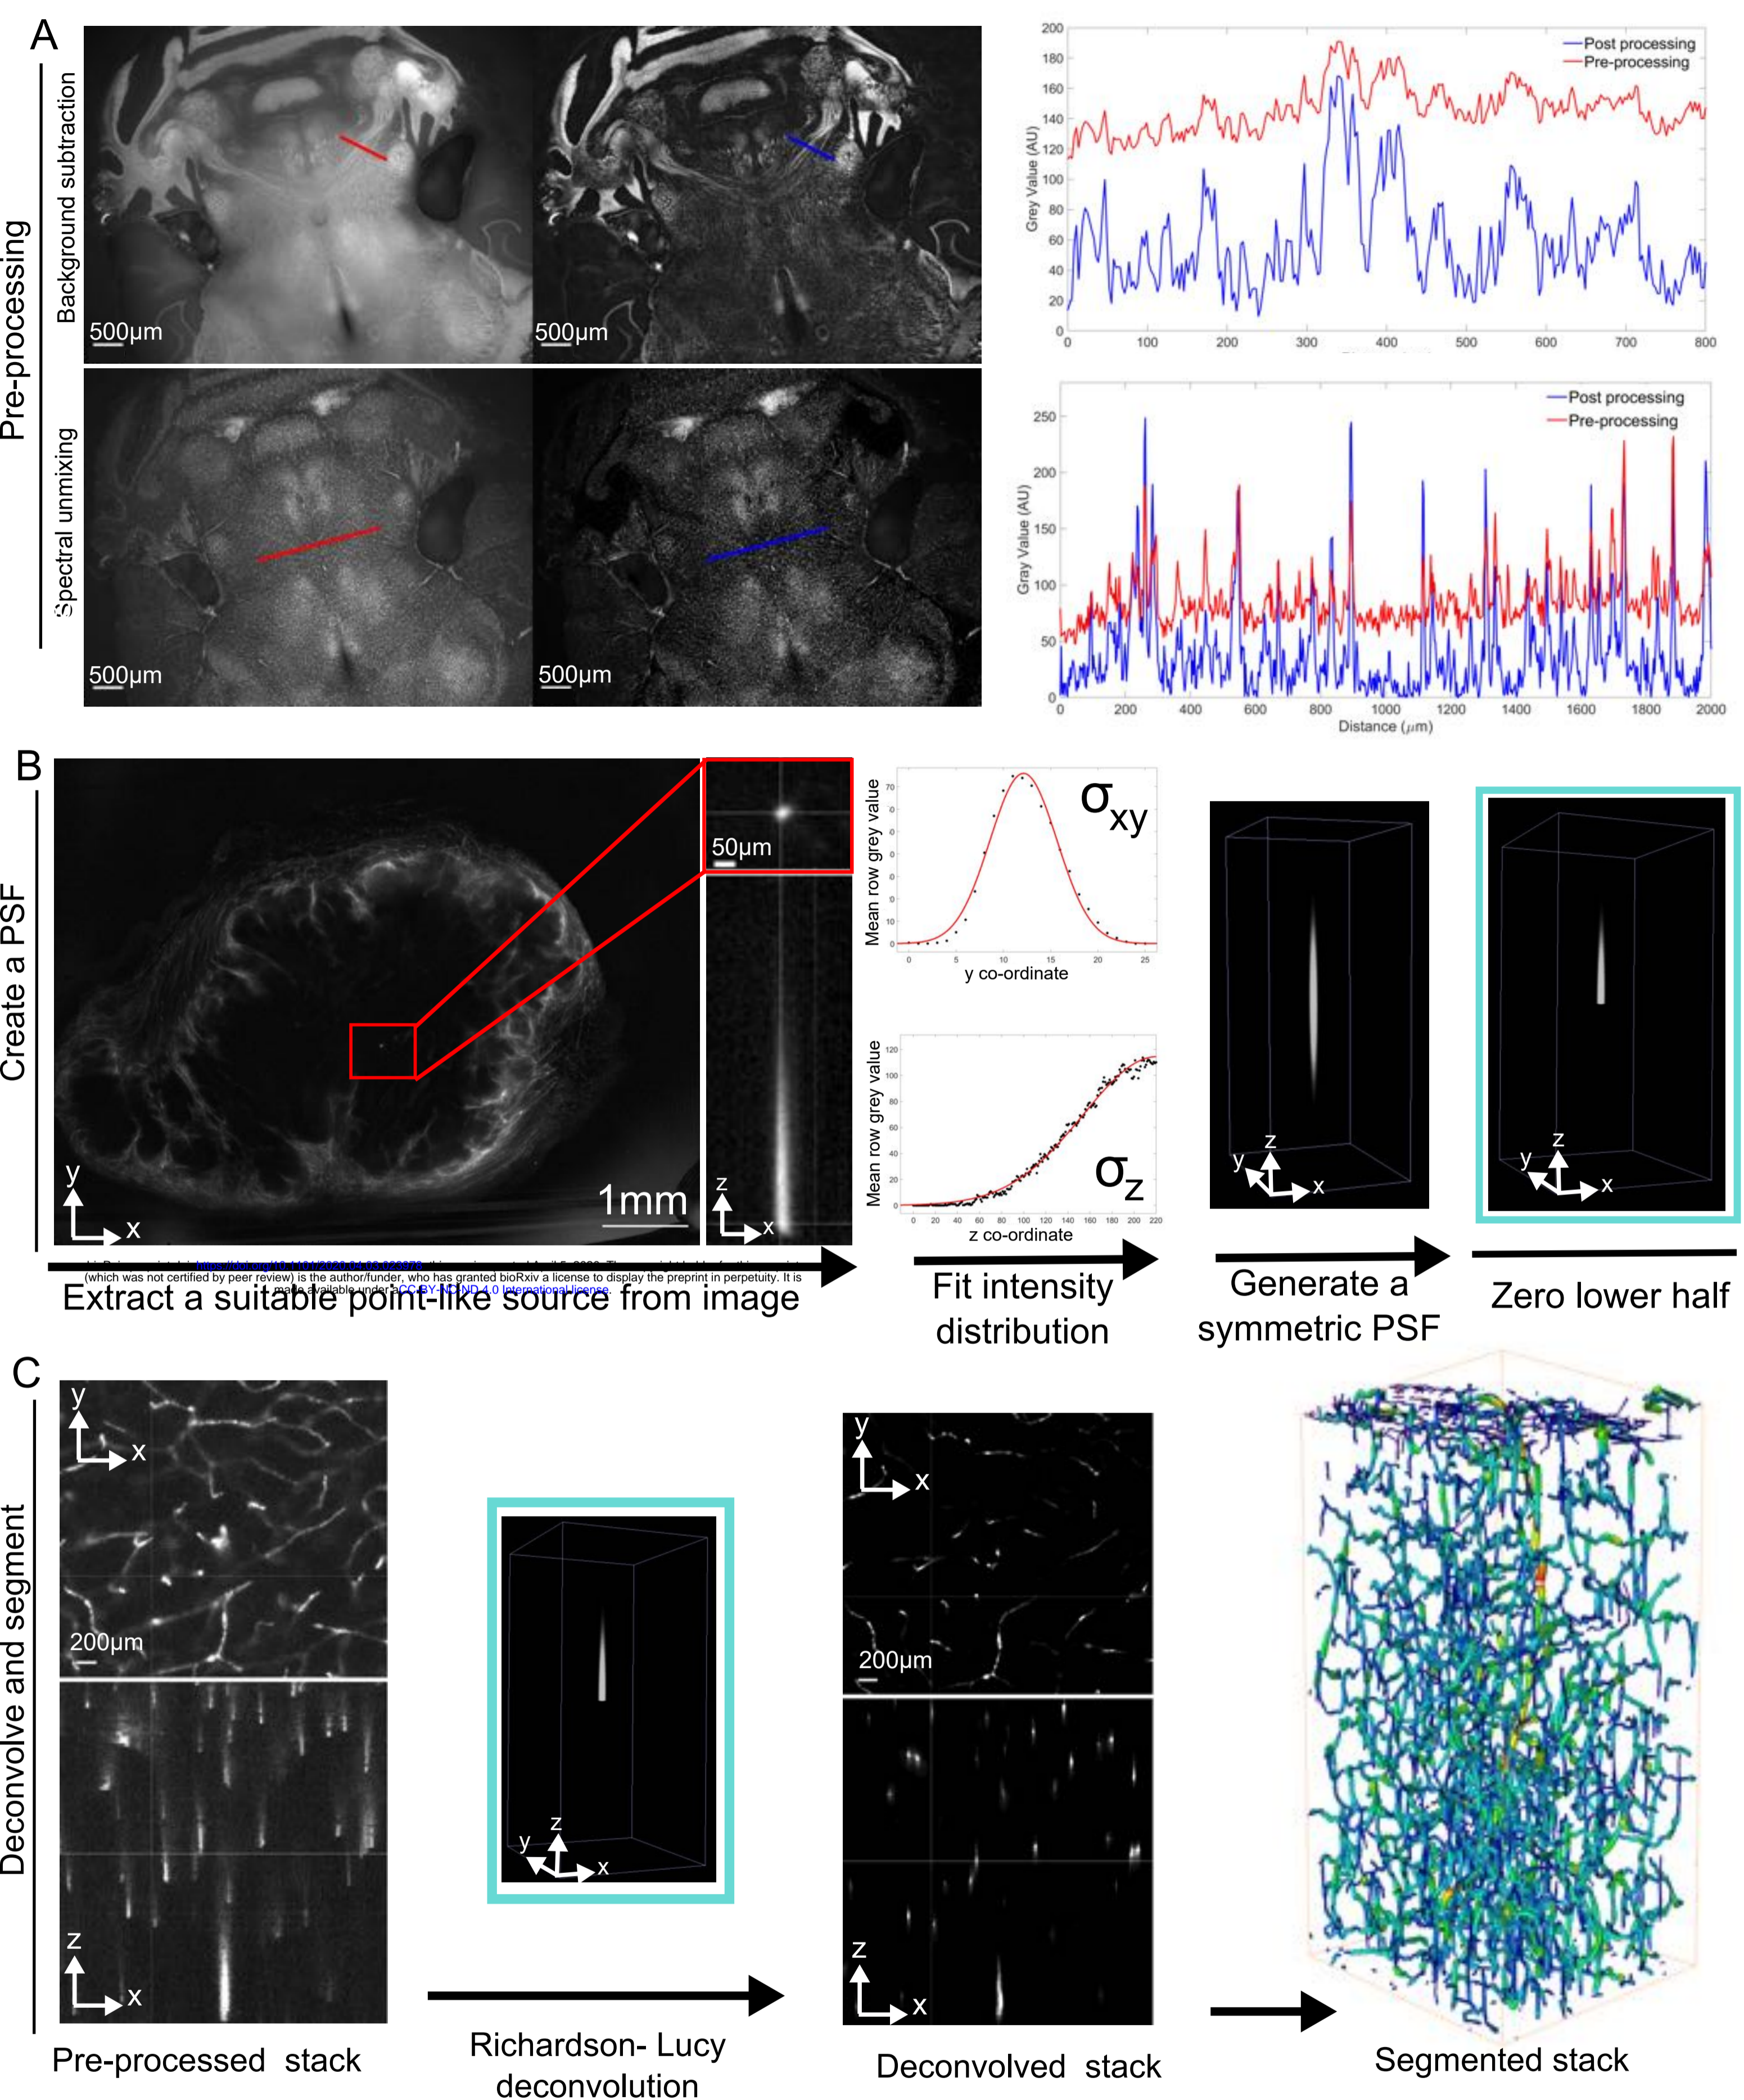

Figure 4. The Image processing pipeline. A) Showing the increase in signal-to-noise ratio achieved by pre-processing, using a rolling-ball algorithm to remove autofluorescence (upper row) and spectral unmixing to remove cross talk in multi-fluorescent image stacks (lower row). B) Showing the pipeline for the extraction of a PSF from an image stack of a subcutaneous tumour with microvasculature stained via injection of Lectin-Dyelight649. A suitable point-like source is found in the image stack, this is cropped from the image and a model PSF (in this case 3D gaussian) is fitted to the data. The parameter fits are used in the construction of a synthetic (symmetric) PSF using open source PSF generation with DeconvolutionLab2 (59) and ImageJops (60). This PSF is then half zeroed to create the final PSF. C) The deconvolution of the pre-processed image stack using the PSF. A Richardson-Lucy method with 35 iterations (60) is used to deconvolve the stack creating images that can then be segmented and quantified using various methods dependent on the biological context. In this case a MOST tracing algorithm implemented in Vaa3D (40)–(42), (48) is used to segment and skeletonise vascular networks.

234 separate the contributions, improving image signal-to-noise ratio. Figure 4A shows the  
235 improvement in the signal-to-noise for a mouse brain sample that was dual stained for  
236 microvascular (Lectin – DyeLight649) and white matter (CMDiI) (emission at 625 nm).  
237 Spectral unmixing and background subtraction were performed using freely available  
238 ImageJ plugins (further details in Methods) (36). Quantification of line profile signal  
239 intensities show the improved signal-to-noise ratio.

240

#### 241 **Compatibility of fluorescent stains with MF-HREM sample preparation**

242 To standardise and increase the speed of testing of fluorescent stains, we used a  
243 standardised 3D tissue culture (see Methods for details) to test the compatibility of  
244 commercial cell counterstains with the MF-HREM processing steps. Embedding cells in a 3D  
245 extra-cellular matrix, and imaging at each stage of dehydration and resin infiltration, allowed  
246 straightforward observation of fluorescence quenching or stain-target dissociation in a  
247 controllable system. Stains were assessed regularly over a 12-hour period, as it was found  
248 that fluorescence quenching often only became apparent after a prolonged period in  
249 dehydratant/resin. Table 2 provides a list of tested stains and their compatibility with organic  
250 solvents. Counter-stains for cell nucleus, cytoplasm and membrane have been identified.  
251 The testing of Neurofilament A antibody shows the importance of correct dehydratant  
252 selection, as it can be successfully imaged with an ethanol dehydration but not through  
253 acetone dehydration. Also of note is the lipophilic stain CMDiI which is compatible with MF-  
254 HREM: this highly useful stain is incompatible with many clearing techniques due to the de-  
255 lipidation step (27).

256 Where the standard 3D culture could not easily be used, e.g. for in vivo staining routes or  
257 specific antibodies, compatibility was tested on cryosections from stained organs (12).

258

#### 259 **Optimisation of stain penetration into tissue samples**

260 Optical imaging techniques that rely on whole-mount staining (such as MF-HREM), require  
261 homogenous and rapid stain penetration, which can be enabled by increasing tissue  
262 permeability. We investigated four methods to increase the permeability of tissue samples  
263 for use with MF-HREM based on the literature (6,10,37,38): freeze-thaw, proteinase K (P[K])  
264 digestion, iDISCO (which combines several mild detergents (6)) and saponin (N=4). Figure 5  
265 shows the comparison of the four methods and reveals that saponin-treated samples  
266 showed significantly greater stain penetration, compared with the control case ( $p=0.04$ ). The  
267 iDISCO method increased stain homogeneity ( $p=0.055$ ) compared to control kidneys.

268

269 Alternative staining routes, in particular i.v. or via transcardiac perfusion, are additional and  
270 potentially far faster routes for stain administration in animal models. For vascular staining,  
271 use of i.v. injection of fluorescently-conjugated lectins is widely used to stain vasculature  
272 throughout the mouse body (8). This technique is transferrable to MF-HREM and in Figure 6,  
273 Figure 7 and Figure 8, we show the use of fluorescently conjugated lectin administered via  
274 tail vein i.v. in mouse kidney, xenograft tumour and brain respectively. Additionally, using the  
275 post-processing tool box we segment and quantify vascular structures in all three cases.

276

#### 277 **Imaging glomeruli in adult mouse kidney with MF-HREM**

278 Having developed the sample processing, image acquisition and post-processing pipeline,  
279 we imaged a range of samples to demonstrate the potential utility of MF-HREM and to  
280 provide comparison to other 3D optical imaging modalities. The three-dimensional structure

| Stain                                                                                         | Fluorescence retain in ethanol | Fluorescence retained in Acetone | Manufacture/Supplier and catalogue number |
|-----------------------------------------------------------------------------------------------|--------------------------------|----------------------------------|-------------------------------------------|
| Eosin B                                                                                       | Yes                            | Yes                              | Sigma 45260                               |
| Eosin Y                                                                                       | (Poor solubility)              | NT                               | Sigma 230251                              |
| Acridine Orange                                                                               | Yes                            | Yes                              | Sigma A6014                               |
| Actin Green™ 488 Ready Probes                                                                 | No                             | NT                               | Thermo Fisher R37110                      |
| NucRed™ Live 647 ReadyProbes                                                                  | No                             | NT                               | Thermo Fisher R37106                      |
| CellMask™ Orange Plasma membrane Stain                                                        | No                             | NT                               | Thermo Fisher C10045                      |
| HCS CellMask™ Red Stain                                                                       | Yes                            | Yes                              | Thermo Fisher H32712                      |
| HCS NuclearMask™ Deep Red Stain                                                               | Yes                            | Yes                              | Thermo Fisher H10294                      |
| DAPI                                                                                          | Yes                            | No                               | Sigma Aldrich D9542                       |
| Invitrogen™ Lectin GS-II From <i>Griffonia simplicifolia</i> , Alexa Fluor™ 647 Conjugate     | Yes                            | Yes                              | Invitrogen™ L32451                        |
| DyLight 649 labeled Lycopersicon Esculentum (Tomato) Lectin (LEL, TL)                         | Yes                            | Yes                              | Vector DL-1178-1                          |
| Anti-Neurofilament heavy polypeptide antibody                                                 | Yes                            | No                               | Abcam ab4680                              |
| CellTracker™ CM-Dil Dye                                                                       | Yes                            | Yes                              | Invitrogen C7001                          |
| Propidium iodide                                                                              | yes                            | NT                               | Invitrogen P1304MP                        |
| SP-DiOC <sub>18</sub> (3) (3,3'-Diocadecyl-5,5'-Di(4-Sulfophenyl)Oxcarbocyanine, Sodium Salt) | Poor solubility                | Poor solubility                  | Invitrogen D7778                          |
| Wheat Germ Agglutinin, Alexa Fluor™ 647 Conjugate                                             | Yes                            | Yes                              | Invitrogen W32466                         |
| Green fluorescent protein (GFP)                                                               | No                             | No                               | NA                                        |

Table 2. Detailing stains with manufacture details that have been tested for compatibility with MF-HREM dehydration protocol.

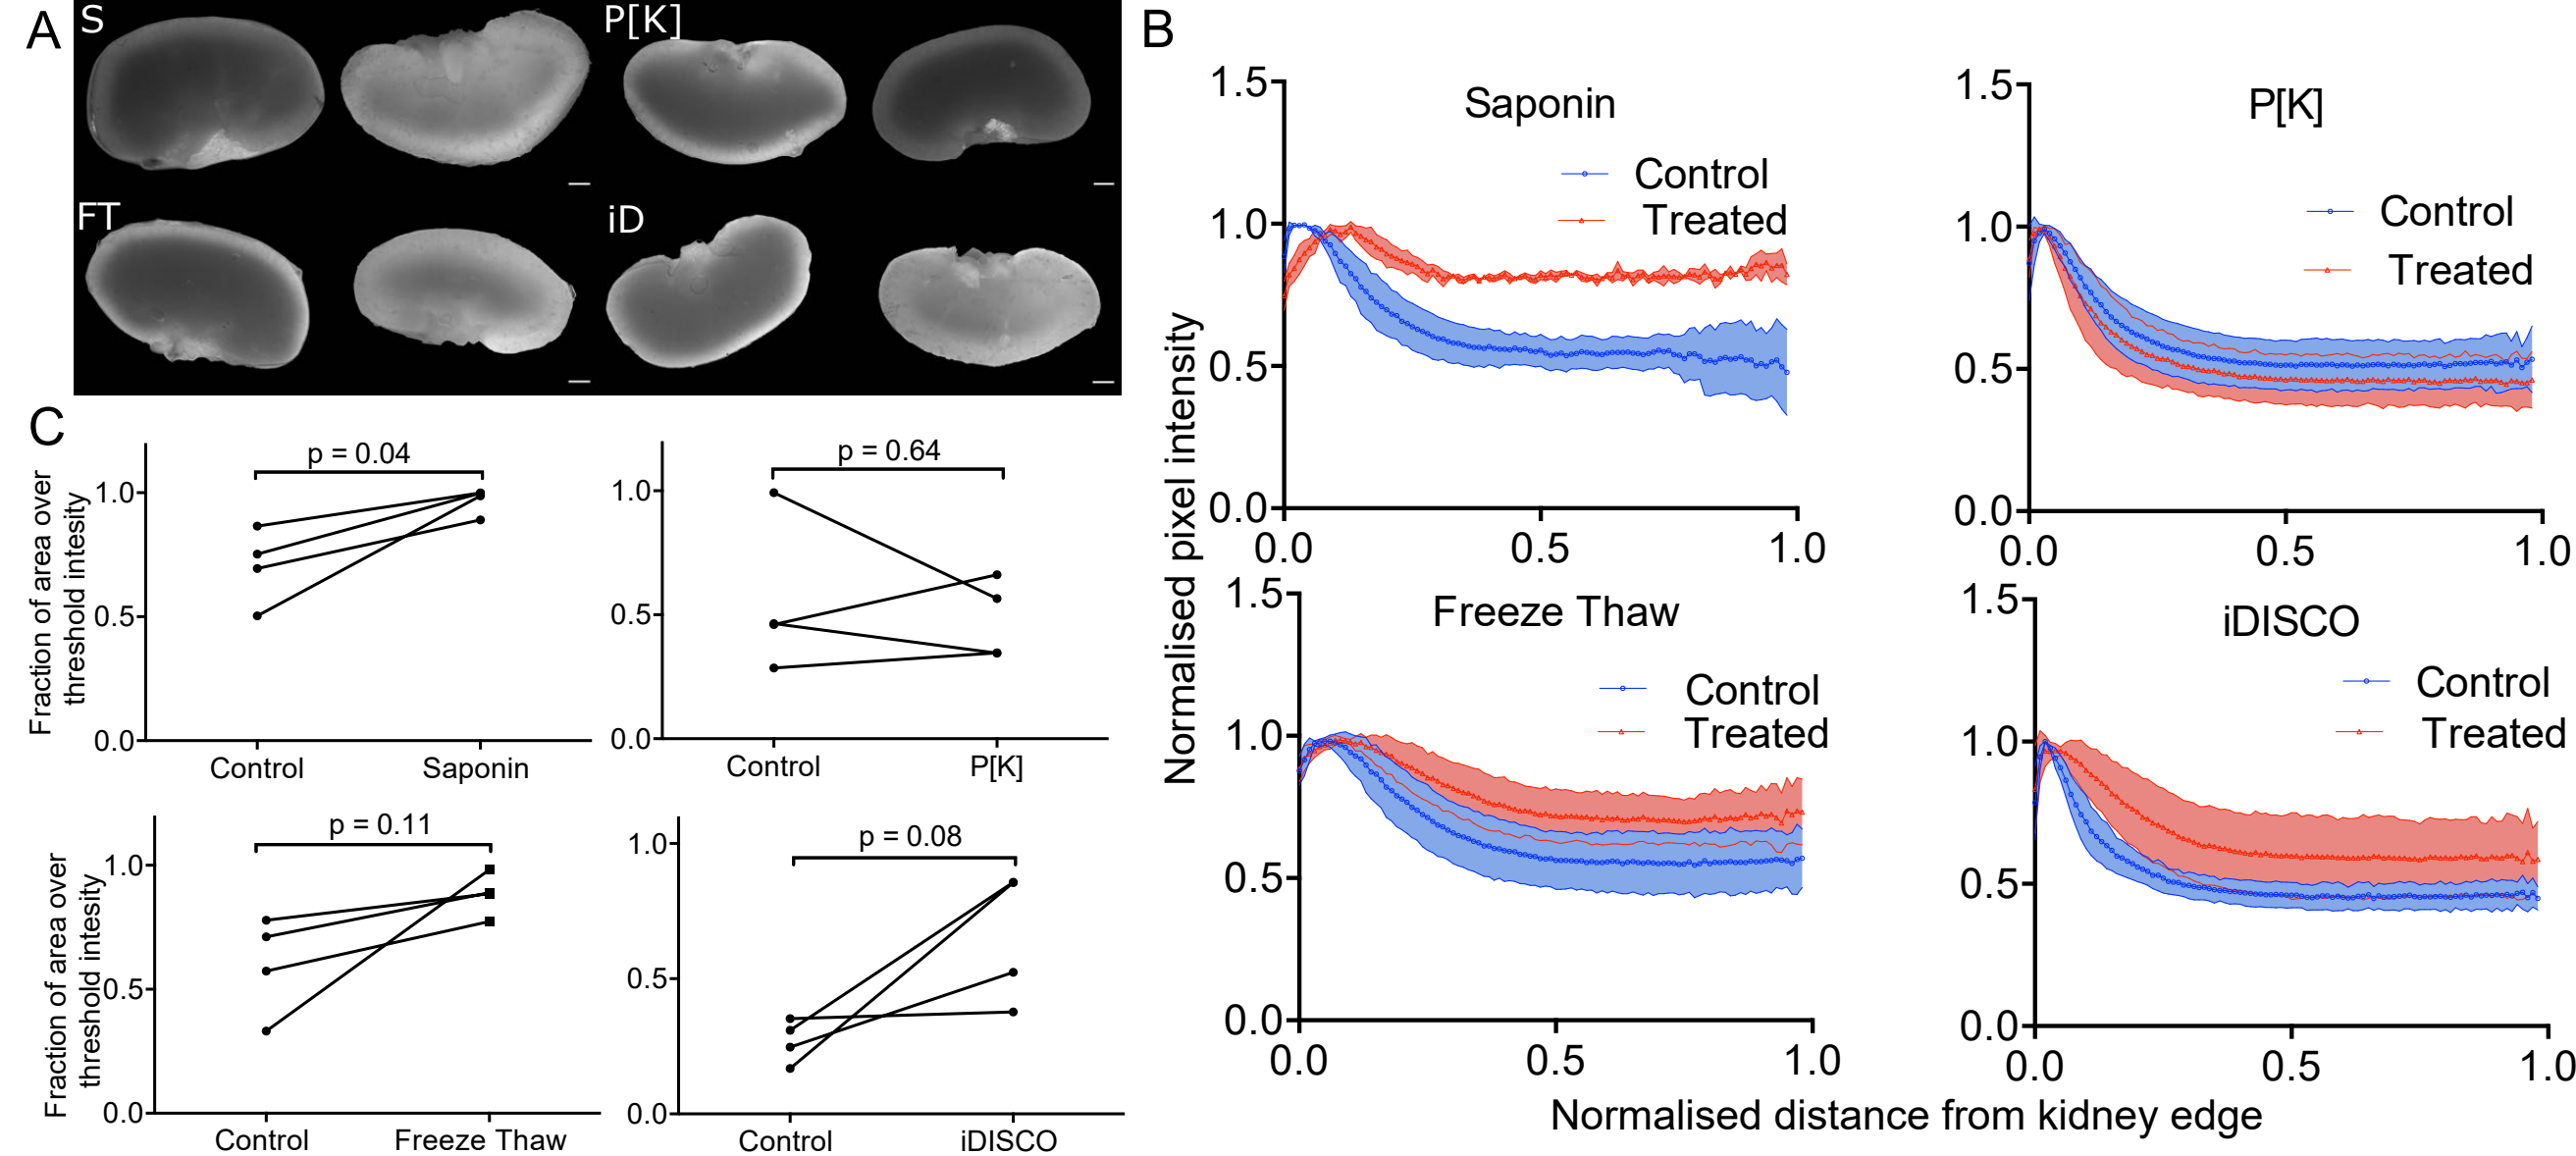

Figure 5. Optimisation of stain penetration in adult mouse kidney samples. Four methods for improving stain penetration are compared: saponin treatment, proteinase [K] digestion, freeze-thaw and iDISCO. For each method, four treated and four control kidneys were investigated, where one kidney from each animal was used as a control for the contralateral kidney. A) shows representative images of the kidneys with the control (contralateral kidney on the left and the treated kidney on the right (scale bar, 1 mm). B) shows the normalised PC-HREM signal intensity profile as a function of radial distance from the kidney centre. C) shows the fractional area of the kidney section image, above a threshold value (the same threshold was used for each treated kidney and matched control). Results of paired t-test analysis demonstrates that saponin treatment significantly increased stain penetration ( $p < 0.05$ ).

281 of glomeruli, networks of small vessels in the cortex of the kidney, have been shown to be a  
282 biomarker of renal and cardiovascular disease (39). Using a lectin-Dyelight649 conjugate  
283 (Ex/Em 649/670 nm) to stain glomeruli, we acquired MF-HREM data in wild-type, adult  
284 mouse kidneys (Figure 6). After image processing steps described above, glomeruli were  
285 segmented using a gradient vector flow segmentation technique implemented in Vaa3D(40–  
286 42). This algorithm is a widely used extension to a traditional active contour segmentation  
287 technique, where the external energy term in the traditional active contour algorithm is  
288 replaced with the gradient vector flow field. After segmentation, the kidney cortex was  
289 manually labelled (Figure 6A) and any structures segmented that were not within the cortex  
290 were removed. The final step used a connected components analysis and filters any small  
291 objects from the data.

292 The MF-HREM analysis revealed a glomeruli distribution that was consistent with their  
293 known spatial distribution and with other measures for wild-type (WT) adult mice performed  
294 with light sheet or in vivo MRI (39,43) MF-HREM pixel size was 2.17  $\mu\text{m}$  lateral and 2.58  $\mu\text{m}$   
295 axial, enabling identify glomeruli which had a minimum volume of  $24 \times 10^5 \mu\text{m}^3$ .

296

### 297 **Imaging tumour blood vessels and cell invasion with MF-HREM**

298 Tumours have notoriously complex blood vessel networks, and three-dimensional imaging  
299 has become a useful method to image their complexity and to study drug delivery (8).  
300 Additionally, understanding tumour cell invasion has implication for understanding tumour  
301 metastasis and potential treatment targets (44). Figure 7 shows MF-HREM imaging of a  
302 subcutaneous xenograft tumour mouse model, initiated from the FaDu human breast cancer  
303 cell line. Tumour cells were labelled prior to injection with CM-Dil, a medium-term  
304 fluorescent cell-tracking dye that endures for approximately four cell divisions, and is  
305 transferred through cell division but not cell-cell contact, (Ex/Em 553/570 nm). Tumour  
306 vasculature was stained by i.v. administration of fluorescent Lectin-Dyelight649 (Ex/Em  
307 649/670 nm) conjugate. Figure 7A and B show a representative 2D slice with the both stains  
308 visible and the 3D reconstruction of the data in both channels.

309 These data reveal the dense, branching vasculature at the periphery of the tumour, and the  
310 labelled cells primarily in the tumour centre, which appeared to be non-perfused. The inset  
311 to Figure 7A shows yellow arrows marking what seem to be individual or small clusters of  
312 cells in a section of tumour where a group of cells is slightly separate from the main tumour  
313 bulk.

314 This section of tumour when analysed in 3D with the full MF-HREM pre-processing pipeline  
315 (Figure 7C) allows the individual cells to be clearly located (yellow arrows) and their  $x, y, z$   
316 locations described. Whilst it is unclear whether labelled cells are viable (which would  
317 require a different reporter strategy) these results demonstrate the ability of MF-HREM to  
318 quantify the 3d location of injected cells in tissue volumes  $\sim 1 \text{cm}^3$  several weeks after  
319 injection.

320 For the vascular channel, Figure 7D, E and F show the MF-HREM image processing  
321 pipeline, with the final vessel segmentation and skeletonisation being carried out using the  
322 APP2 algorithm from the Vaa3D neuron tracing plugin (40–42,45). The chaotic nature of the  
323 vasculature can be seen from this analysis and such vascular networks can be used in  
324 simulations of drug delivery (8) and for understand tumour vessel growth mechanism (46).

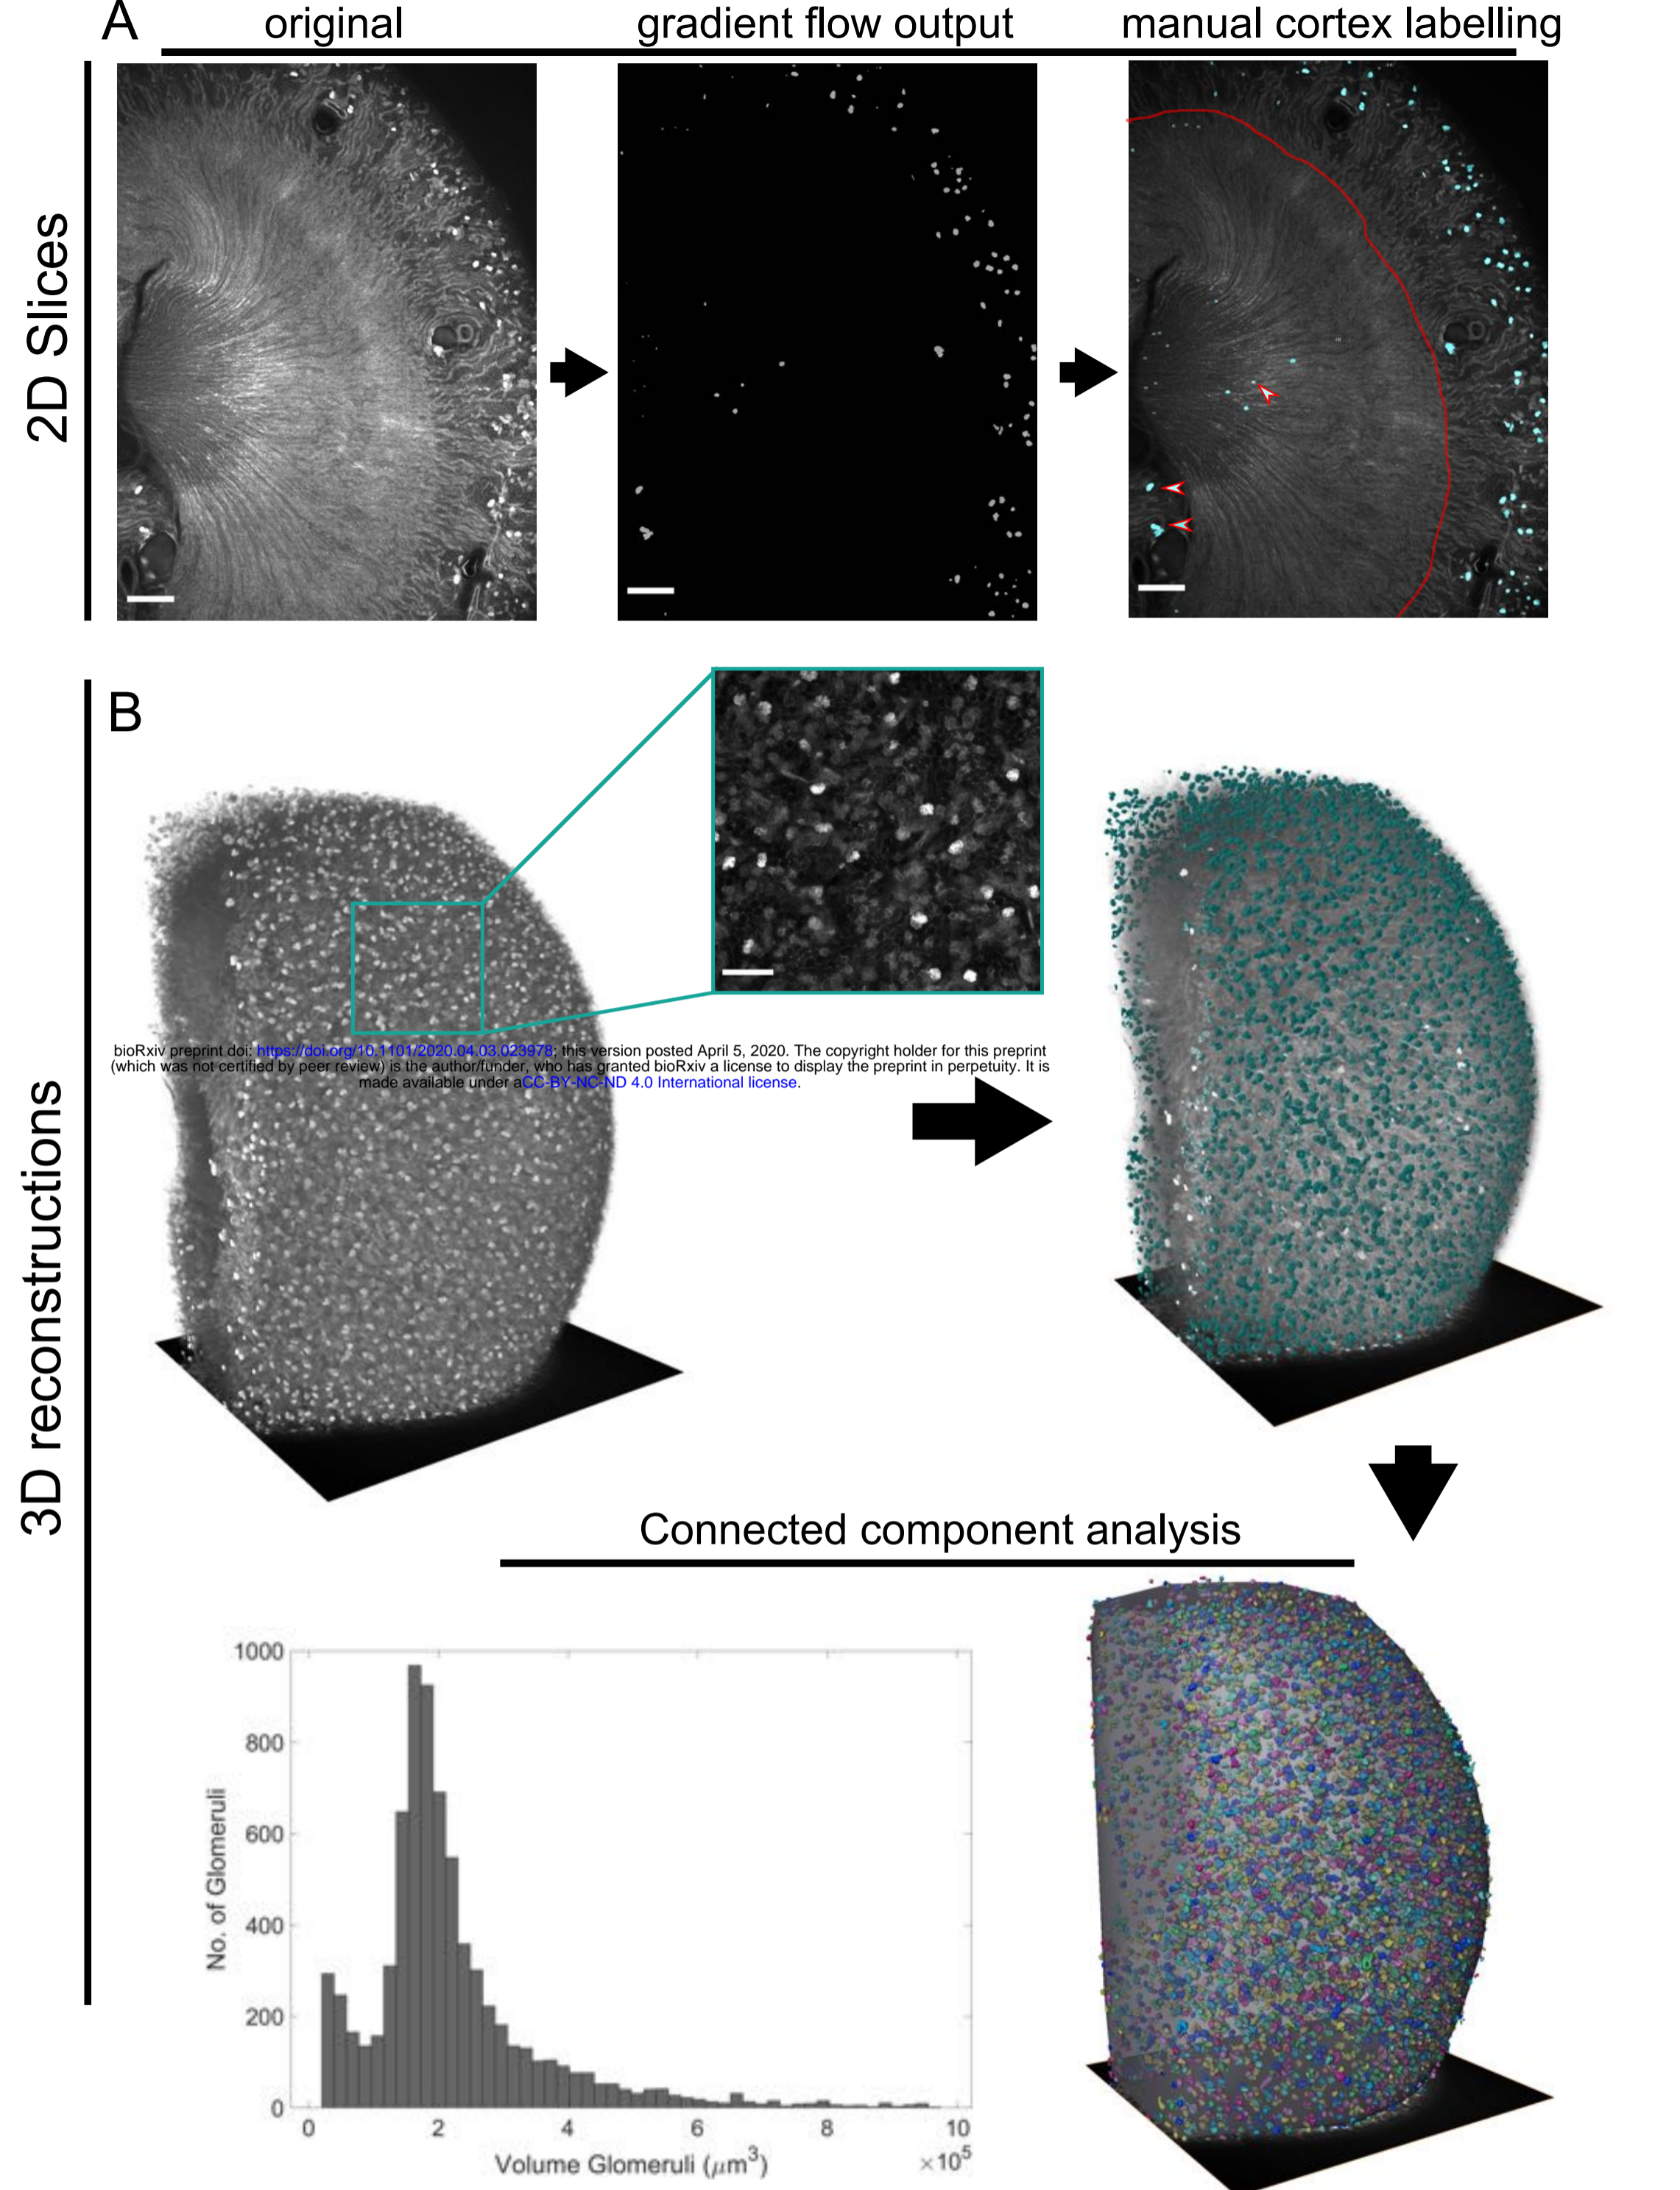

Figure 6. Showing the Lectin-Dyelight649 channel of a multi-stained murine kidney and quantification of glomeruli. A) From left to right 2D slices showing: the original image, the segmentation produced by gradient vector flow algorithm, and finally, the manual correction to remove structures that are segmented (white/red arrows) but fall outside the kidney cortex (red line). Scale bars 500  $\mu\text{m}$  for all 2D slices. B) 3D details of the image processing. The original image stack with inset showing the detail which can be seen on the kidney surface (scale bar 200  $\mu\text{m}$ ), then the segmentation via gradient flow algorithm in Vaa3D (40)–(42) and manual exclusion of points not in the cortex. The final step is the outcome of the connected components analysis and hence quantification of glomeruli number, and volume distribution. These data show the expected distribution and size of glomeruli for healthy WT mouse as compared with other techniques(39), (43) .

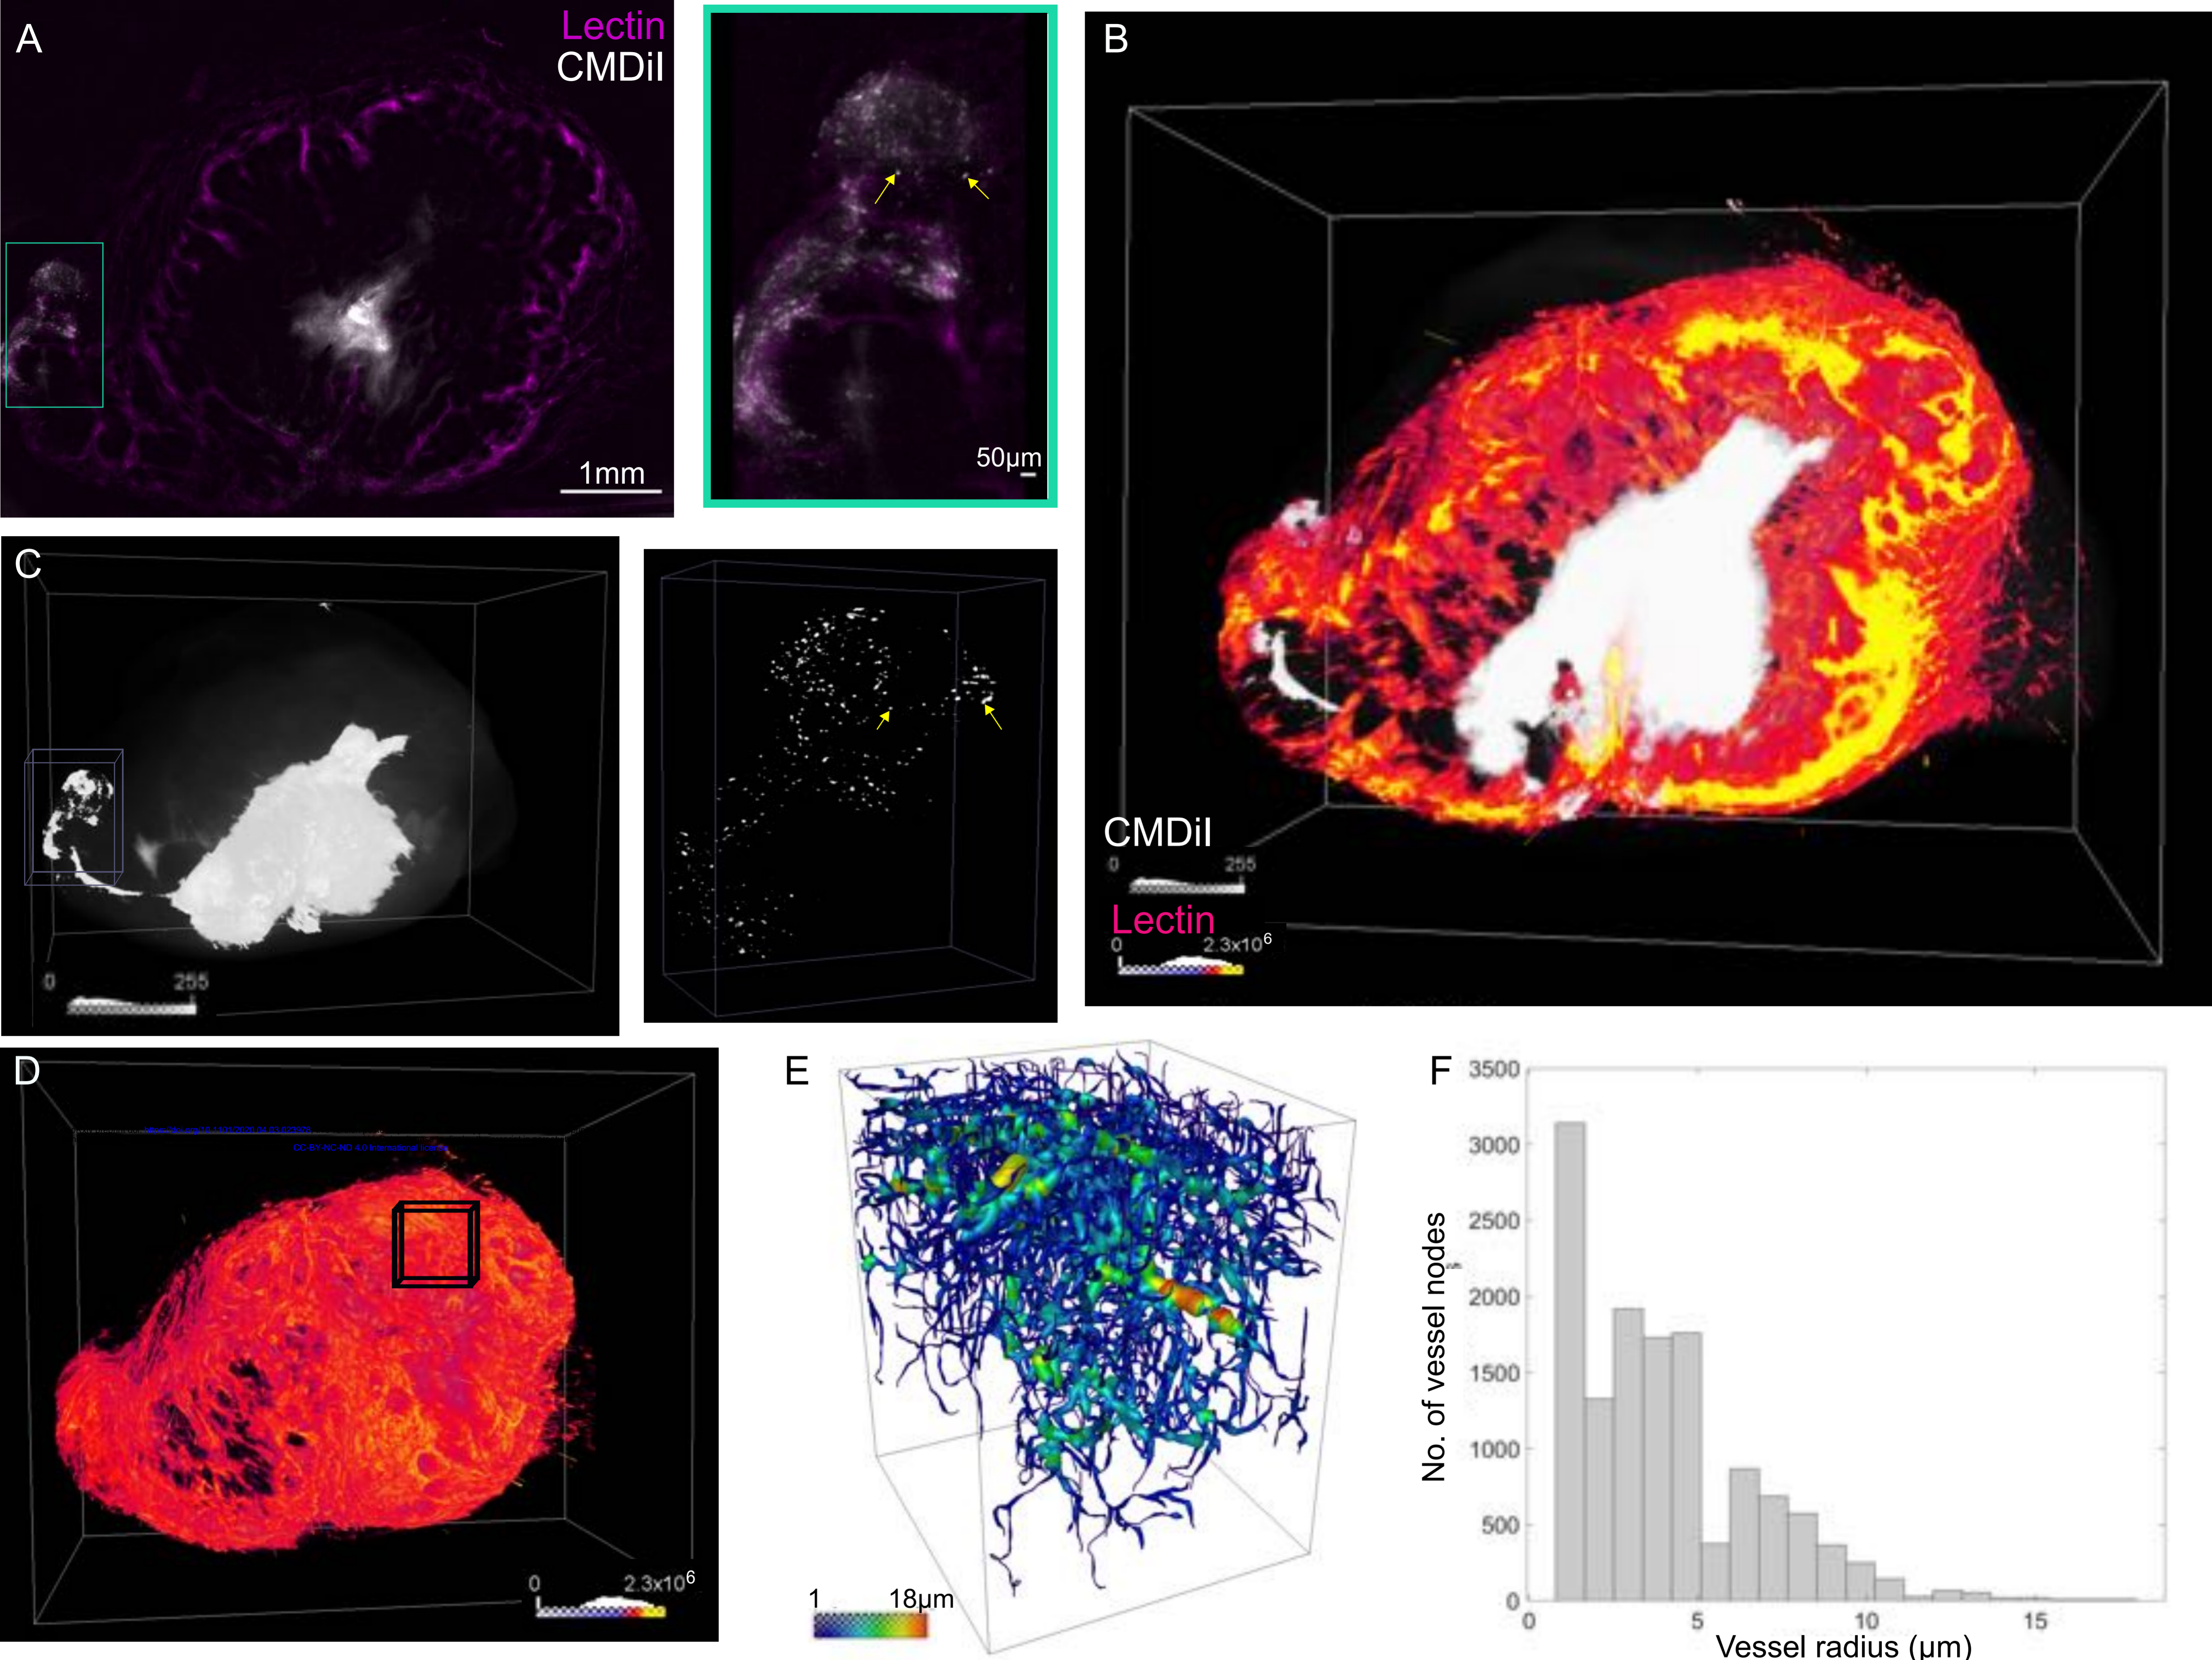

Figure 7. Xenograft tumour model analysis. A) Showing a single representative slice with the two stains: CMDiI for injected cell tracking (white), and Lectin-Dyelight 649 conjugate for microvascular staining (magenta). The inset shows a digitally zoomed in portion of the image where small approx. circular structures of cell size are indicated by yellow arrows. B) A 3D rendering of the two channels shows the tumour in its totality with a cut through to show the spatial arrangement of the injected cells within the vascular network. The highly perfused rim can be clearly seen. C) Showing a 3D rendering of the CMDiI channel only and the extent of the cell migration from the initial injecting. The inset shows the same group of cells as in A, deconvolved and rendered in 3D. The yellow arrows indicate the same structures as the 2D case which can more clearly be seen to be single cell or small clusters. The 3D position of these clusters is available from such image data. D) The 3D rendering of the vascular network. E) The extraction and segmentation of a section of the vascular network following the PSF extraction described earlier. In this case the APP2 algorithm from the Vaa3D neuron tracing plugin set was used to segment and skeletonise the deconvolved image stack (40)–(42), (45). F) Shows the histogram of the vessel radii from E.



325

## 326 **Imaging brain microvasculature and white matter tracts in a mouse brain with MF-** 327 **HREM**

328 The three-dimensional spatial distributions of many brain structures including vasculature  
329 cells and white matter are of key importance for understanding healthy brain function and  
330 changes in these features are used as biomarkers for a large number of neurological  
331 pathologies such as Alzheimer's (4,47).

332 Probing these structures in 3D with MF-HREM can provide insight into many of these  
333 conditions and may also provide validation for other clinical imaging tools such as MRI.

334 Figure 8 shows the application of MF-HREM in two instances: where a brain is dual labelled  
335 with CMDil as a white matter-marker and lectin-Dyelight649 as a microvascular stain (figure  
336 8A-E); and where a brain is dual labelled with CMDil as a white-matter marker and HCS  
337 Nuclear Mask as a marker for cell distribution (Ex/Em 638/686) (Figure 8F-8H).

338 Figure 8B shows a high-resolution sub-volume of the vasculature segmented using the MF-  
339 HREM processing pipeline and the MOST tracing algorithm implemented in Vaa3D is used.

340 This algorithm is a rayburst sampling algorithm implemented in a marching fashion (48).

341 The microvasculature can be seen to have a large population of vessels with similar radius  
342 (1-4  $\mu\text{m}$ ) and a small number of descending vessels with larger radius ( $\sim 10 \mu\text{m}$ ). This  
343 distribution is similar to the mean radius measured in other serial sectioning modalities e.g.  
344 MOST (49) and for clearing techniques (50) although no large vessels ( $>10 \mu\text{m}$ ) are present  
345 in MF-HREM data, due to the preferential binding of lectin to microvasculature over larger  
346 vessels as noted previously (50).

347 Another important feature of brain microstructure is tissue orientation particularly for white  
348 matter which is routinely measured in clinical settings using diffusion weighted MR (DW-  
349 MR). This technique measures brain microstructure based on the constrained diffusion of  
350 water within the tissue structures. Despite its widespread use for white-matter tractography,  
351 the validation of DW-MR is a much discussed issue (51–53). Performing validation requires  
352 high-resolution images over large fields of view which must be registered to MR images if  
353 quantitative validation is to be performed. Previously CMDil has been used on individual  
354 histological sections of mouse brain to validate tractography from DW-MR (52,54). Whilst  
355 this approach is somewhat successful, it is difficult or even impossible to fully align 2D  
356 section with the corresponding MR sections. Figure 8D and 8H show white matter  
357 orientation. Orientation is calculated from the structure tensor of the image. A Gaussian  
358 gradient and 8pxl window size were used in 8D while a 4pxl window size was used in Figure  
359 8H to reflect the different pixel sizes of the images. The hue, saturation and brightness  
360 denote the orientation, coherence and original image brightness respectively. The colour bar  
361 shows the angle represented by the hue. Figure 8E shows a polar histogram of the  
362 orientation in Figure 8D where all orientations with a coherence greater than a threshold  
363 value of 0.2 are displayed. It can be seen there appears to be an even distribution of local  
364 orientations over this sub volume.

365 CMDil effectively stains white matter tracts due to its lipophilic nature and MF-HREM allows  
366 orientation analysis on the entire 3D volume.

367 Such images, particularly the whole brain in Figure 8H, are ideal for validation of MRI  
368 tractography data. Tissue clearing techniques are also often unsuitable for this application  
369 as lipophilic dyes are often not retained through the de-lipidation stage of clearing protocols  
370 (27).

371 In addition to white matter, cell distributions are important markers for development and  
372 disease. Figure 8G shows a single slice at a higher magnification from the imaging volume

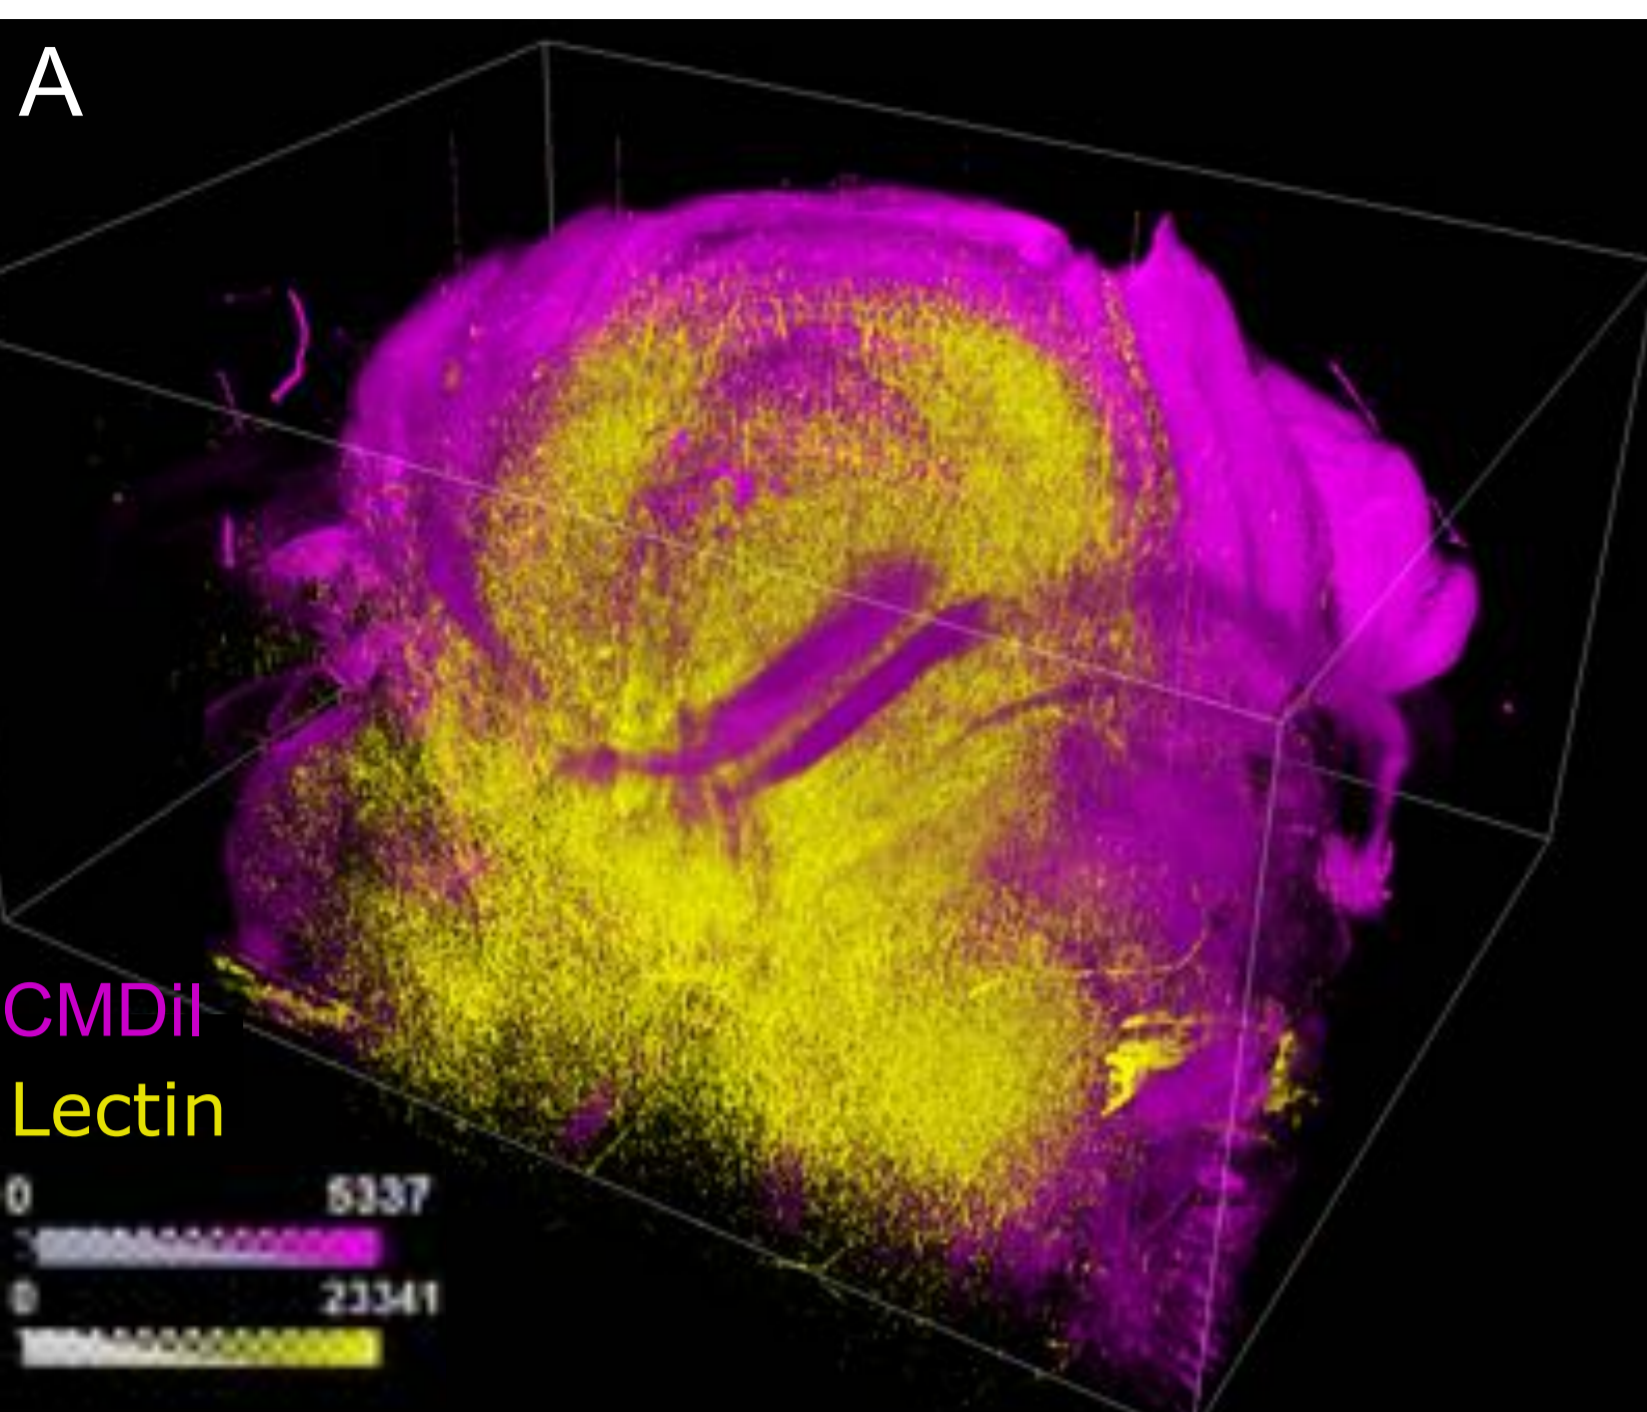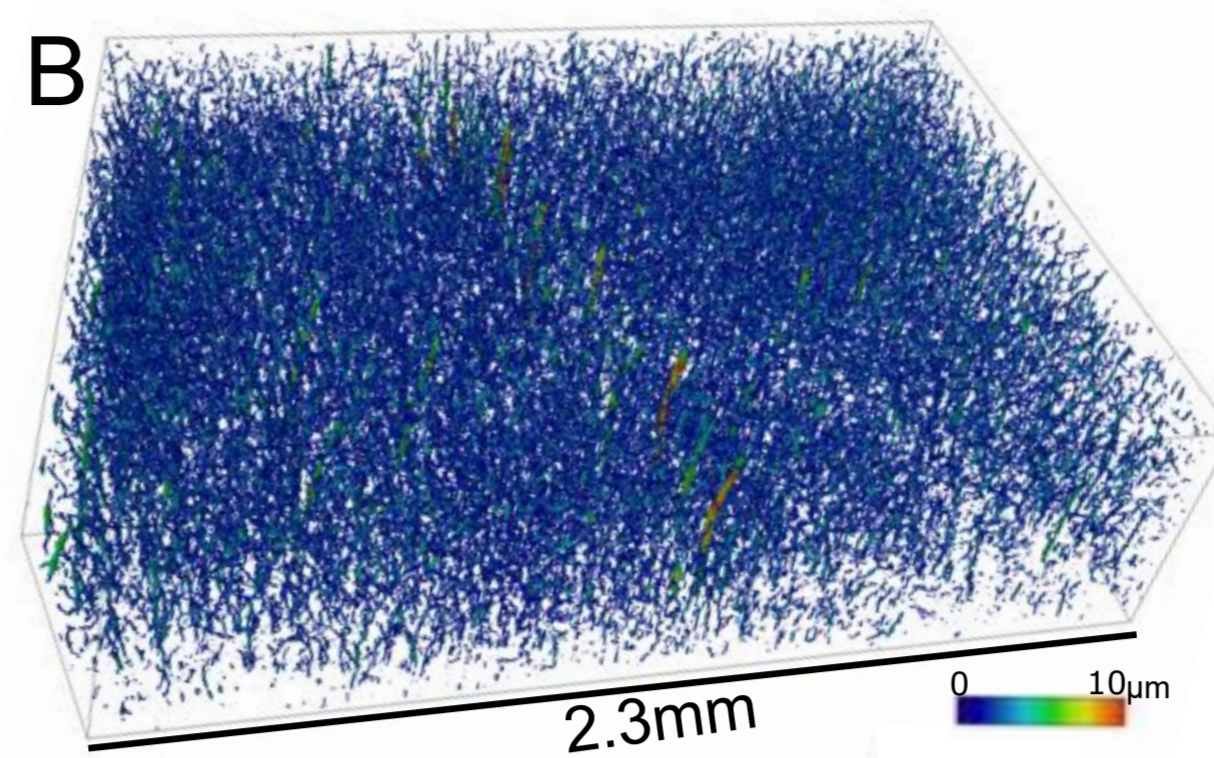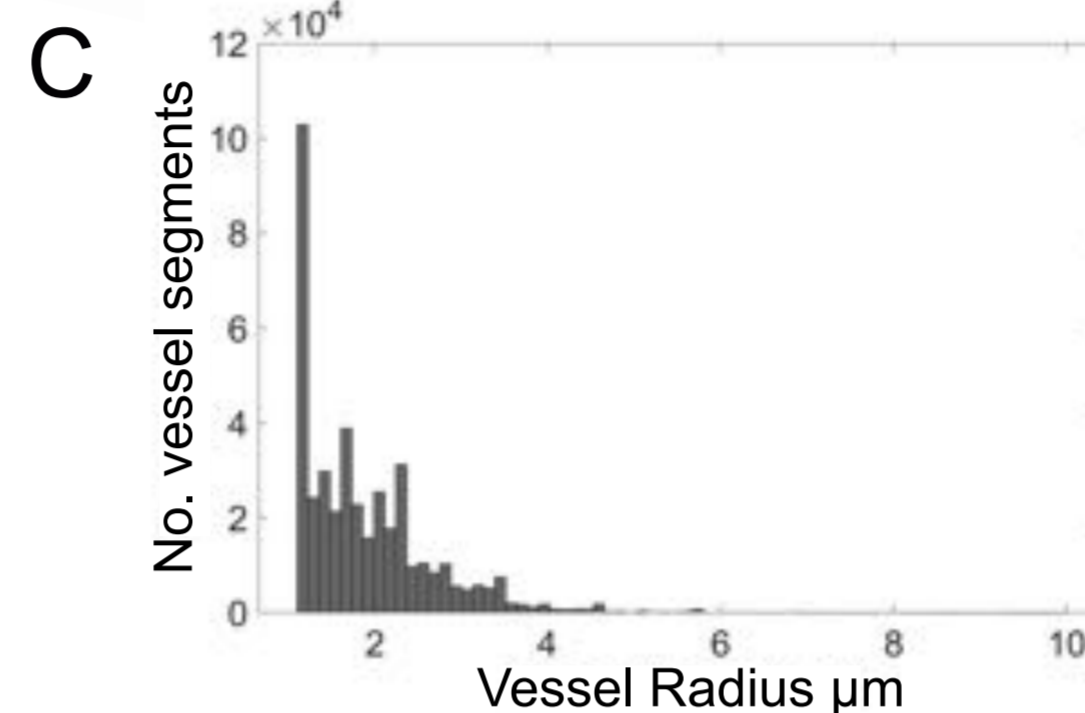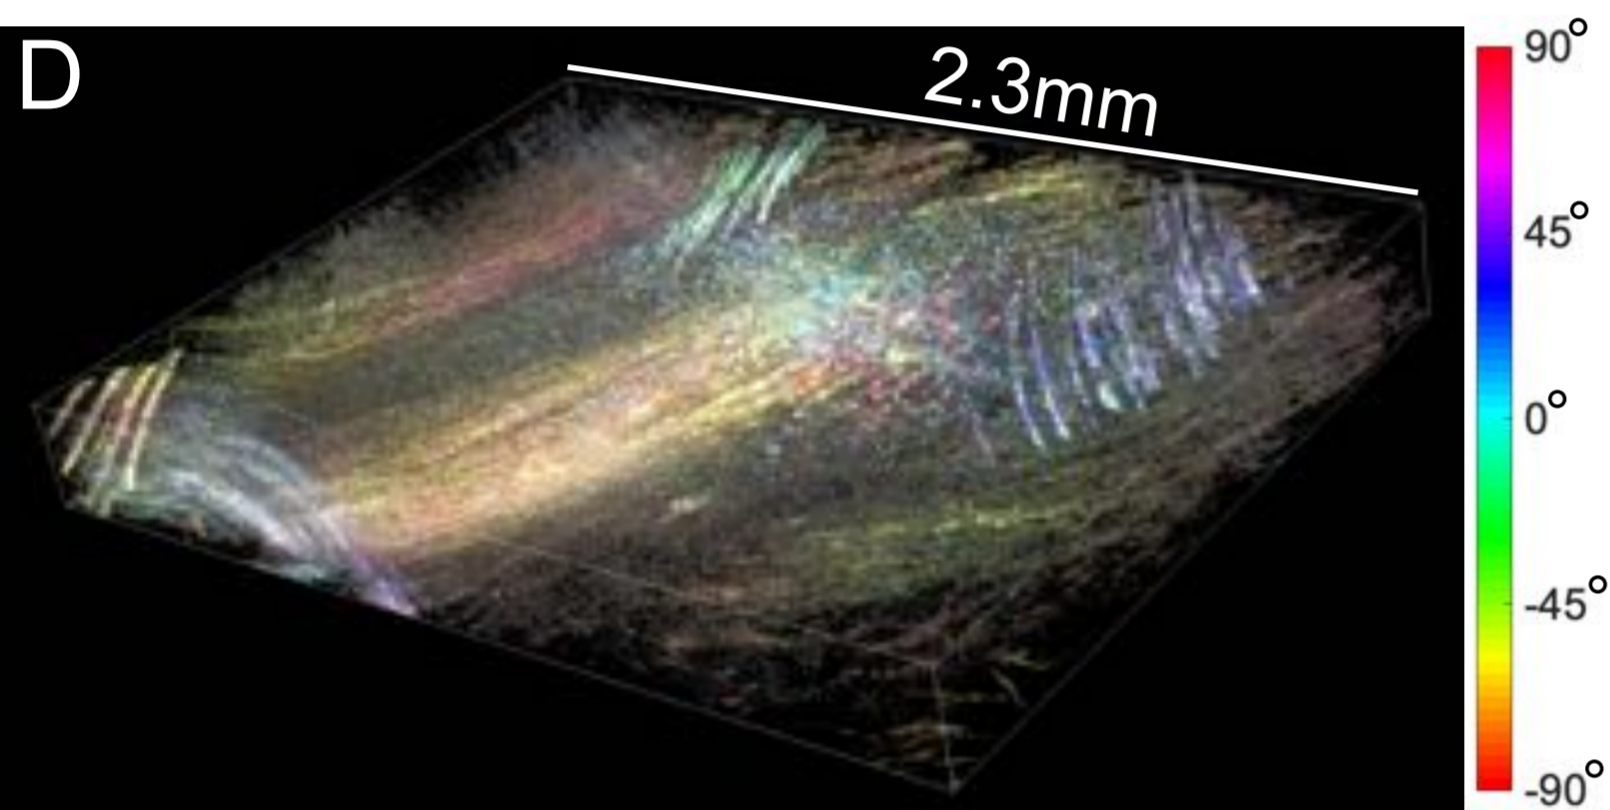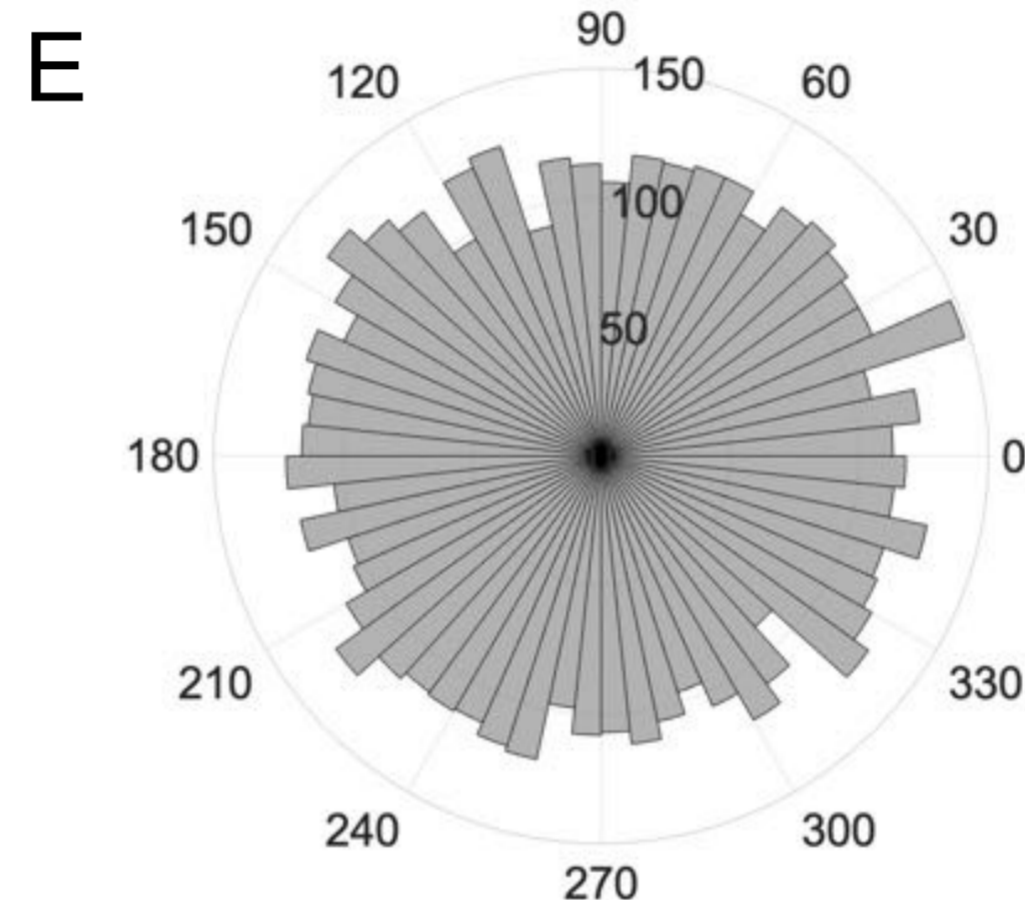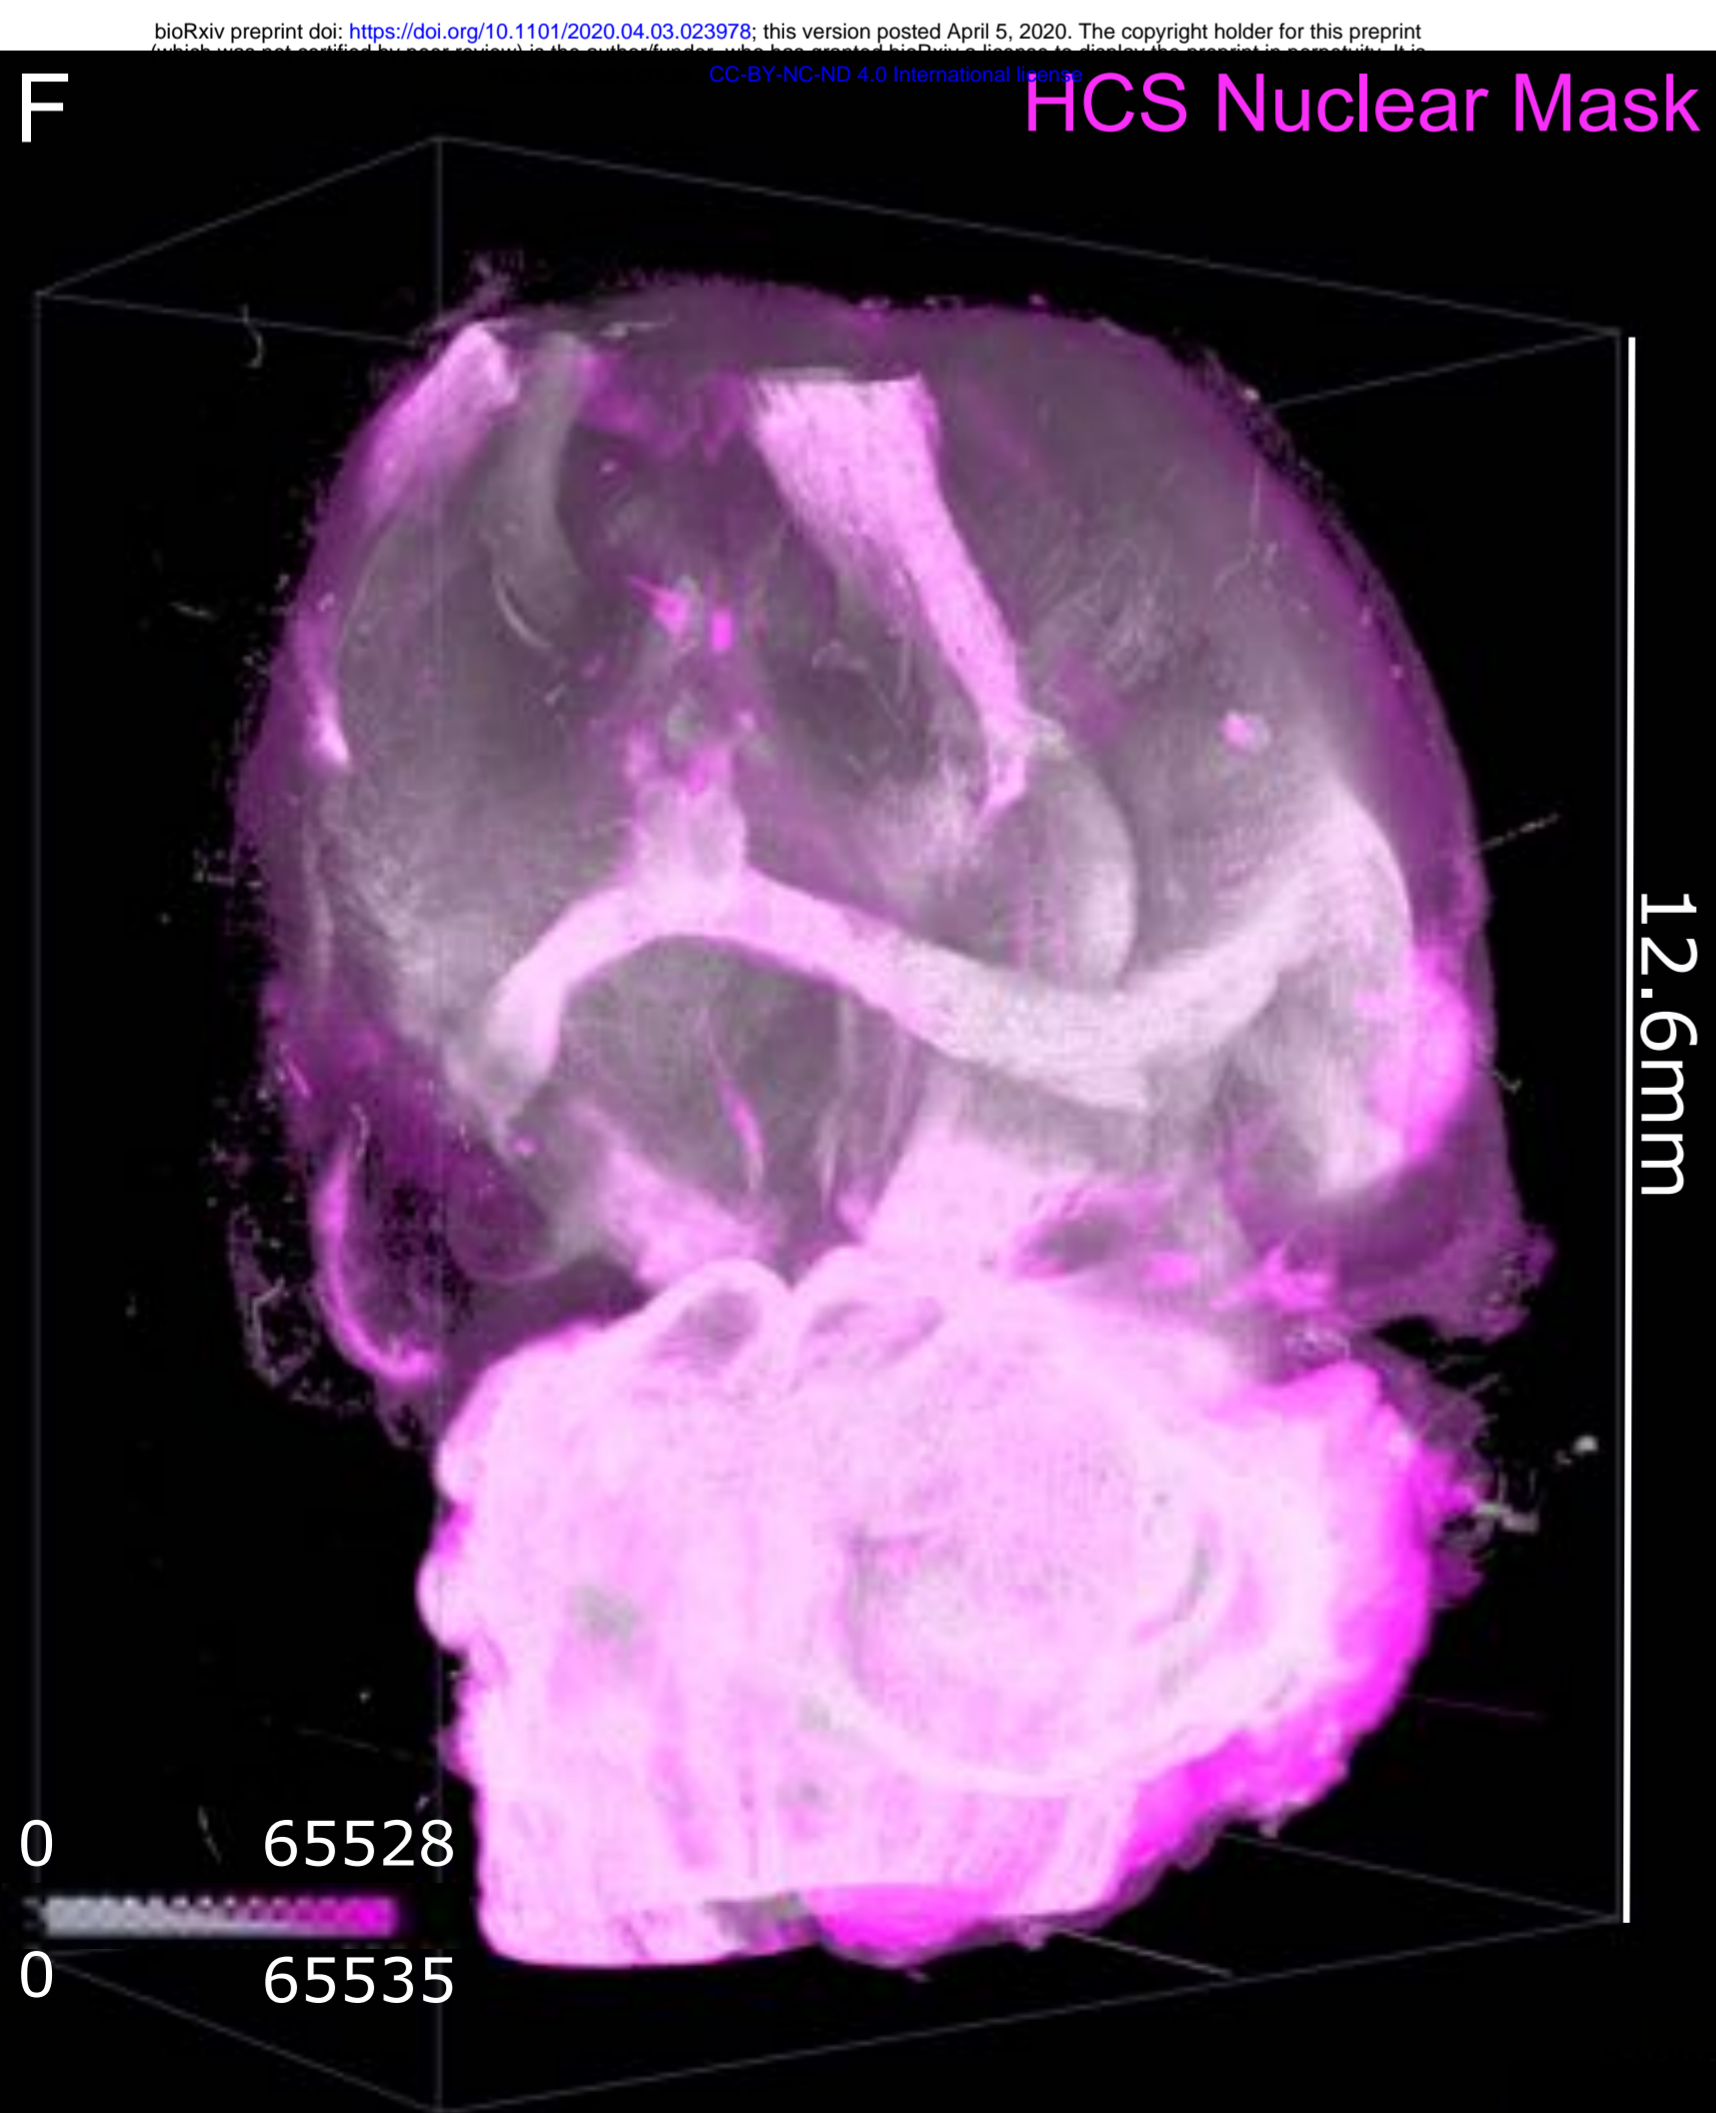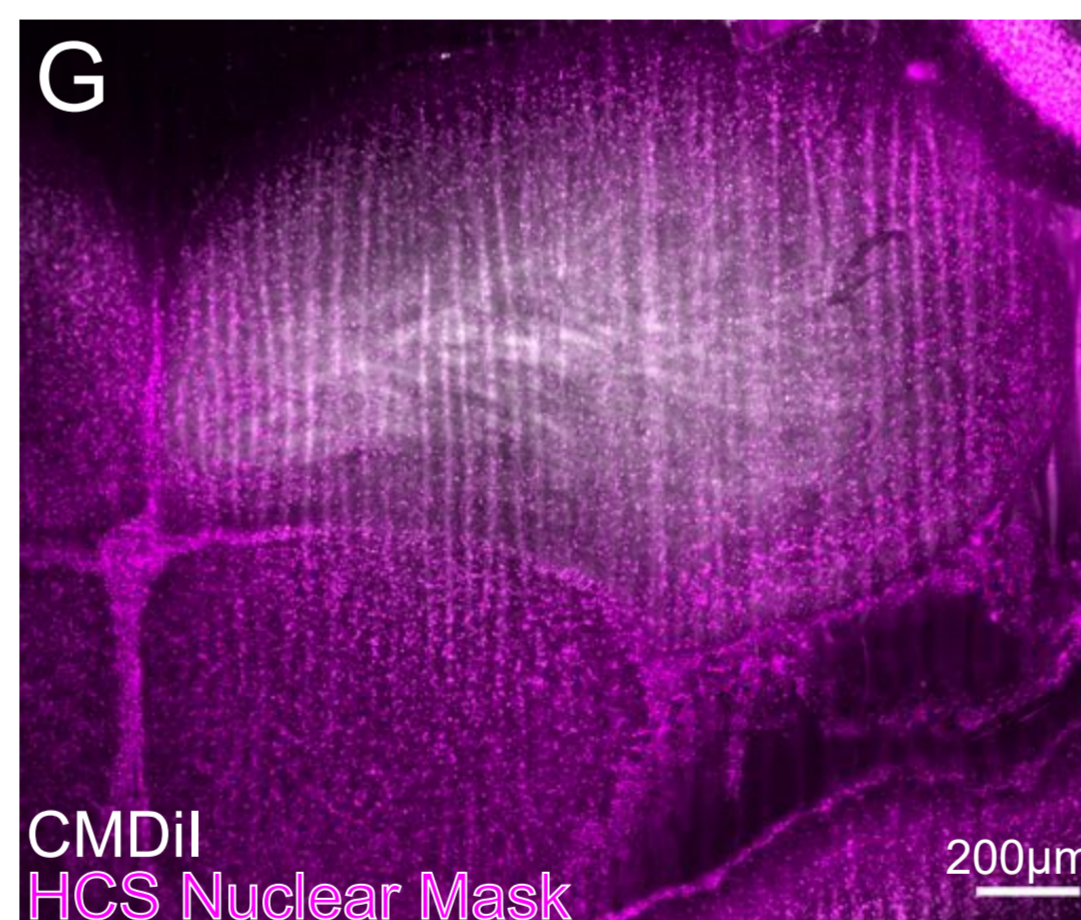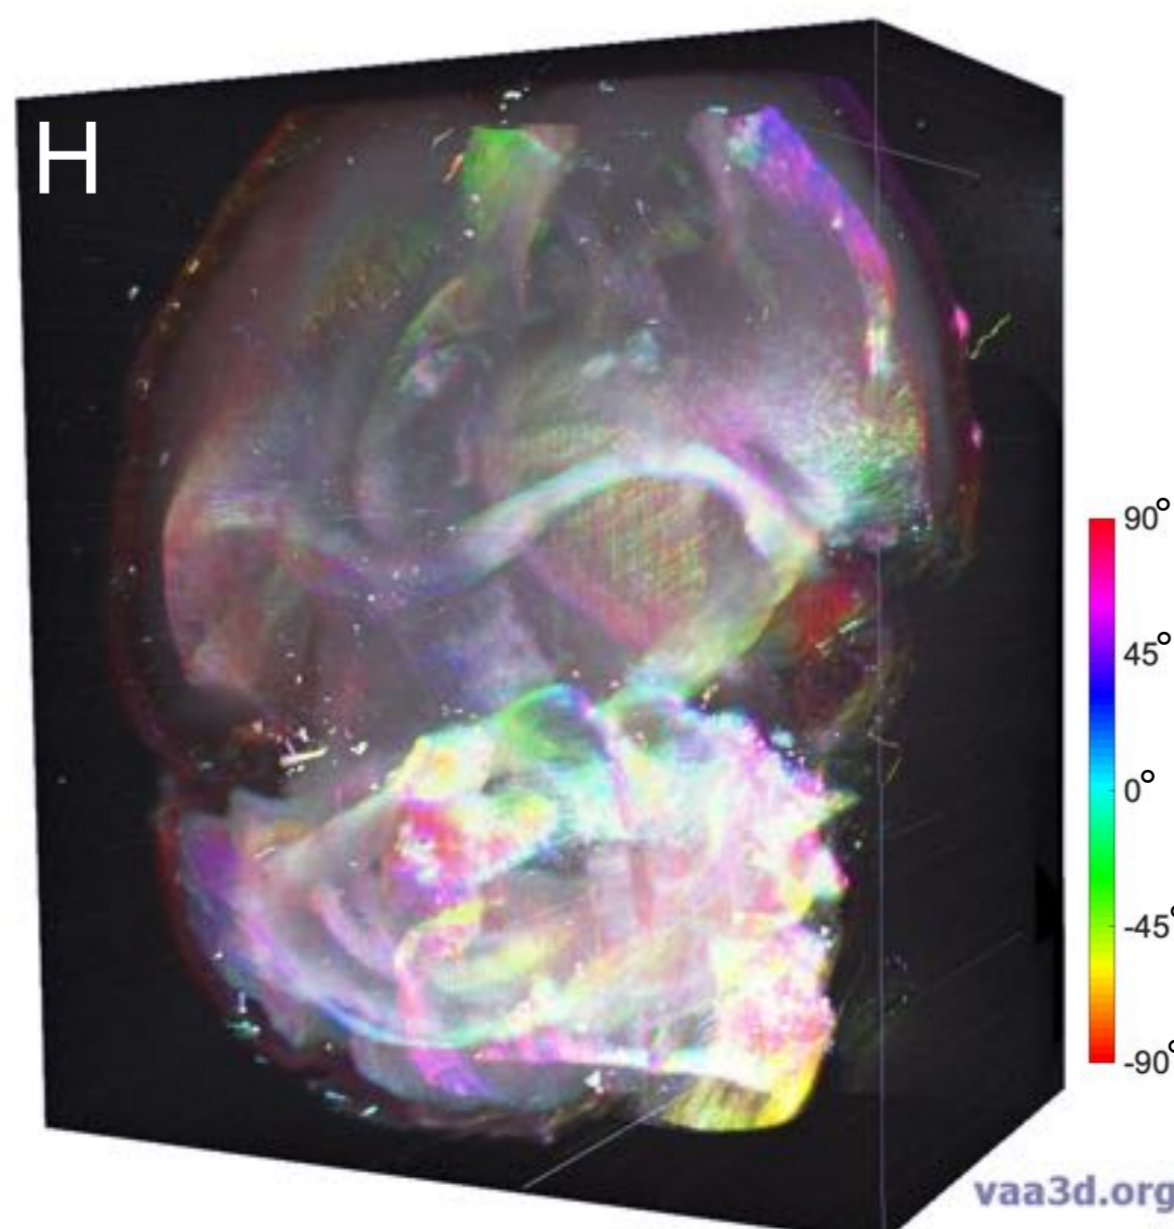

Figure 8. MF-HREM of two brain samples, one stained with CMDiI Ex/Em 553/570nm and Lectin-Dyelight 649 (Ex/Em 649/700); and a second stained with CMDiI and HCS Nuclear Mask (Ex/Em 638/686). A) Showing the volume overlay of both the CMDiI (Magenta) and the Lectin (yellow). Colour bars show pixel intensity. B) Shows a high resolution sub-volume of the vasculature channel successfully segmented and skeletonised using the MF-HREM processing pipeline and the MOST tracing algorithm implemented in Vaa3D. C) Shows the histogram of radii distributions. D) Shows the same sub-volume in the CMDiI- white matter channel, here an orientation analysis has been performed via calculation of the structure tensor of the image using a Gaussian gradient and 8pxl window size. The hue, saturation and brightness denote the orientation, coherence and original image brightness respectively. The colour bar shows the angle represented by the hue. E) Shows a polar histogram of (D) where all orientations with a coherence greater than a threshold value of 0.2 are shown. It can be seen there appears to be an even distribution of local orientations over this sub volume. F) Shows a volume overlay of the CMDiI channel (White) and the HCS nuclear mask channel (magenta) for a different brain sample. G) shows a single slice imaged at higher resolution in which nuclei can be clearly seen. H) demonstrates white matter orientation over the whole brain. It was computed as in (D) but using a smaller window size of 4pxls. The orientation can be seen to clearly follow the expected white-matter tracts.

373 in Figure 8F, cell nuclei can be clearly seen and show Nuclear staining has successfully  
374 been retained through processing. Further segmentation requires montaging of higher  
375 resolution images.

376  
377  
378

## 379 Discussion

380 In this work, we have shown the development of MF-HREM though sample preparation,  
381 imaging and image post-processing and quantification. We have demonstrated its  
382 applicability in adult mouse organs through a range staining and quantification approaches.  
383 Further improvements to MF-HREM are possible in several areas of the imaging pipeline.  
384 The resin embedding and staining protocol can be improved by optimisation to a specific  
385 biological problem, e.g. a custom mould can be used for staining where the orientation and  
386 organ are the same for a large number of samples. Additionally, whilst dehydration and  
387 embedding times cannot be easily decreased without compromising the final imaging,  
388 automation of the process using an automated histological sample processor could improve  
389 consistency and enable faster protocol optimisation for a specific application.

390 Despite the increased stain penetration with saponin treatment, difficulties in segmentation  
391 remain primarily due to inhomogeneous staining. Diffusion staining alone will always  
392 struggle to achieve homogenous stain penetration in a timely manner but the use of smaller  
393 staining molecules such as nanobodies (2) or the use of genetically encoded reporters such  
394 as SNAP-CLIP (55), may improve this. Making more use of i.v. staining routes could vastly  
395 decrease the time needed for overall sample preparation, however, the large volumes of  
396 stain needed for these approaches may be a limiting factor (2).

397 Solving the shine-through artefact is a key challenge for MF-HREM and we have  
398 demonstrated two approaches: the inclusion of Orasol Black to physically limit light  
399 transmission thorough the sample; and deconvolution using a half zeroed PSF, generated  
400 from measurement of the sample stack.

401 Our post-processing method to remove shine-through provides a sample specific PSF,  
402 whilst circumventing the problem of poor signal-to-noise that would occur if PSF's were used  
403 directly from the image stack. It removes the onerous and impractical requirement to  
404 measure the PSF using sub resolution beads for each sample, as wavelength, staining,  
405 tissue autofluorescence and many other features are likely to change for each sample.  
406 Our method provides a fast and easy to implement alternative that can be effective, as  
407 shown in our application to brain and tumour microvasculature.

408 To aid in deconvolution and segmentation, other image-processing approaches such as  
409 spectral unmixing (to remove contributions due to spectral overlap in multichannel imaging)  
410 and background subtraction via rolling-ball algorithm (to reduce background  
411 autofluorescence) were found to improve signal-to-noise ratio, ultimately enabling  
412 deconvolution and segmentation. The optimisation of the deconvolution itself is an area that  
413 could benefit from further optimisation. In this first instance of MF-HREM use we have used  
414 the widely-adopted Richardson-Lucy algorithm with no additional constraints to aid in  
415 regularisation, such as a Total-Variation Richardson-Lucy approach, and settled on iteration  
416 number via our ability to further segment the data. A fuller investigation into all the  
417 parameters and models for deconvolution could further improve and aid in the wider

418 adoption of MF-HREM. In order to make this possible, where specialised post-processing  
419 and segmentation algorithms were used, all were from open source software platforms  
420 (36,41).

421 Three-dimensional (3D) optical microscopy has been the focus of a substantial body of  
422 research, with several new technologies coming to prominence in recent years. This has  
423 enabled numerous new biological insights to be made in neuroscience, developmental  
424 biology, cancer and immunology (2,6,8,12).

425 Despite the obvious utility of large-volume, high-resolution 3D optical microscopy, there  
426 remain many challenges. Clearing protocols can often be complex and lengthy, and the  
427 technicality of serial sectioning instruments as well as the long imaging times limit their  
428 widespread adoption (3,12). All of these factors cause delays in optimising new protocols,  
429 restricts studies to small group sizes and often require specialised imaging facilities. This  
430 has created a bottleneck in answering the plethora of potentially important scientific  
431 questions which could benefit from 3D imaging.

432 Making large volume high resolution 3D imaging widely available will create faster progress  
433 on a range of biological questions and will result in protocols and biological conclusions that  
434 are more robust.

435 In this study, we have developed a pipeline for performing MF-HREM, which enables three-  
436 dimensional, multiplexed fluorescence imaging of large tissue samples ( $> 0.5 \text{ cm}^3$ ), at high  
437 resolution. MF-HREM is a block-facing technique that overcomes traditional challenges with  
438 shine-through through the combination of a resin opacifying agent (Orasol Black) and image  
439 deconvolution. This technique could find wide application through its avoidance of optical  
440 sectioning or tissue clearing.

## 441 **Methods**

### 442 **Animal models**

443 All animal studies were licensed under the UK Home Office regulations and the Guidance for  
444 the Operation of Animals (Scientific Procedures) Act 1986 (Home Office, London, United  
445 Kingdom) and United Kingdom Co-ordinating Committee on Cancer Research Guidelines for  
446 the Welfare and Use of Animals in Cancer Research (56)

### 447 **Perfuse fixation**

448 All animals were euthanized via i.p. injection of  $100 \text{ mg kg}^{-1}$  sodium pentobarbital  
449 (Animalcare, Pentoject) diluted in 0.1 ml phosphate buffered saline (PBS). Once anaesthesia  
450 was confirmed, surgical procedures for cardiac perfusion were performed for systemic  
451 clearance of blood. Heparinized saline (20ml) ( $0.2 \text{ ml}$ , with  $1,000 \text{ IU ml}^{-1}$ , maintained at  
452  $37^\circ \text{C}$ ) was administered with a perfusion pump (Watson Marlow, 5058) at a flow rate of  
453  $3 \text{ ml min}^{-1}$  to mimic normal blood flow. After the complete drainage of blood, mice were  
454 perfused with 20 ml of 4% paraformaldehyde (PFA, VWR chemicals  $4^\circ \text{C}$ ). Organs were then  
455 removed and fixed for 2-24h in 4% PFA at  $4^\circ \text{C}$ .

### 456 457 **Murine tumour xenograft model**

458 Eight- to ten-week-old, female, immune-compromised nu/nu nude mice (background CD1)  
459 were used (Charles River Laboratories). Cells from the FaDu human breast cancer cell line  
460 (gifted from Dr Craig Murdoch (Sheffield University)) were cultured in complete medium  
461 (Dulbecco's minimum essential medium Eagle with L-glutamine (DMEM) (Lonza) + 10% fetal  
462 bovine serum (Invitrogen)) in the ratio 1:10 (vol/vol) and incubated at  $37^\circ \text{C}$  and 5%  $\text{CO}_2$ . To

463 prepare for injection, cells were washed with Dulbecco's phosphate buffered saline and  
464 detached with trypsin-EDTA (7–8 min, 37 °C, 5% CO<sub>2</sub>) (Sigma). Cells were labelled with  
465 CMDil (ThermoFisher UK). Stain was dissolved from stock concentration (1mg/ml in Ethanol)  
466 in D-PBS to a working solution of 1 µM. Cells were incubated in the working solution for 5  
467 minutes at 37°C, and then for 15 minutes at 4°C. Cells were then washed and re-suspended  
468 in PBS for injection. A 100 µl bolus of 1 × 10<sup>6</sup> cells was injected subcutaneously into the left  
469 flank above the hind leg of each mouse (N=5), Non-prestained cells were injected into the  
470 right flank. Tumour growth was measured daily with callipers, every day after tumour  
471 became palpable, and were grown until total tumour volume was 1500mm<sup>3</sup> or three weeks  
472 post-injection has elapsed.  
473 For blood vessel staining, 200 µl Lectin (*Tomato*) bound to DyeLyte-649 (Vector UK) (1  
474 mg/ml) was administered via tail vein injection and allowed to circulate for 10 minutes before  
475 perfusion fixation to allow sufficient binding to the vascular endothelium (8).

476

### 477 **Stain penetration**

478 A variety of mice which had not had procedures that would affect this experiment (e.g. mice  
479 with failed subcutaneous tumour induction or those that had been used for MRI sequence  
480 tests) were used in order to reduce the number of animals used. All mice were between 10-  
481 23 weeks old. They were perfuse fixed as above and both kidneys were removed. Each  
482 animal was randomly assigned to one of the four groups (saponin, freeze-thaw, iDISCO and  
483 proteinase [K] digestion) and for each animal one kidney was randomly assigned to  
484 treatment and the contralateral kidney retained as a matched control. In the saponin,  
485 iDISCO and proteinase [K] groups, the control kidney was maintained in PBS and at the  
486 same temperature as the treated kidney. For the freeze-thaw group, the control kidney was  
487 dehydrated and rehydrated through the same methanol series but with no freeze-thaw  
488 cycles applied.

489 Freeze-Thaw: Kidneys were dehydrated through a methanol in dH<sub>2</sub>O series: 20%, 40%,  
490 60%, 80%, 100% for 1 hr in each (7ml per kidney). Kidneys were freeze-thawed 3 times for  
491 20 mins each time at -80 °C. Kidneys were then rehydrated through methanol series  
492 80%,60%,40%,20% ,0% (1 hr each).

493 iDISCO: Kidneys were washed in PTX.2 1hr two times at room temp. Kidneys were  
494 incubated overnight at 37°C in a solution containing 1xPBS, 0.2% Triton-X (Sigma UK), 20%  
495 DMSO (Sigma UK). Kidneys were then incubated overnight at 37°C in a solution of 1xPBS,  
496 0.1% Tween-20 (Sigma UK), 0.1% Triton-X, 0.1% Deoxycholate (Sigma UK), + 0.1% NP40  
497 (Sigma UK), 20% DMSO.

498 P[K]: Tris Buffer containing 1.21 g Tris (Sigma UK), 0.147 g CaCl<sub>2</sub>.H<sub>2</sub>O, (Sigma UK), 65 ml  
499 dH<sub>2</sub>O, 30 ml glycerol (Sigma UK) was made and 40 µg/mL proteinase [K] (Sigma UK) was  
500 added. The sample was incubated at room temp for 10 mins, with constant agitation before  
501 being washed on PBS x3 for 10 mins each.

502 Saponin: A solution containing 2 g of gelatin (VWR) in 1 L PBS was made and filtered  
503 immediately. After allowing the solution to chill, 5 mL of Triton X-100, 0.1 g of sodium azide  
504 (Sigma UK) and 10 mg/ml saponin (Sigma UK) was added to the solution. Kidneys were  
505 incubate for (72 hrs) in 3 ml of solution (PBS for control kidneys) at room temp. with constant  
506 agitation.

507 After treatment, all kidneys were stained for 94 hrs in HCS Nuclear mask (Thermo Fisher  
508 UK) in 40 µl/10ml PBS at room temperature and with constant agitation.

509

## 510 **Spectroscopy**

511 The transmission spectrum of Orasol Black was measured using an HG4000CG-UV-NIR  
512 (Ocean Optics) fibre-fed spectrometer. Samples of Technovit 8100 base sol. plus catalyst 1,  
513 with a low concentration (0.1 mg/mL) of Orasol Black, were measured in a PMMA semi-  
514 micro cuvette over a 4 mm path length, from 350 nm to 95 nm with a QTH10/M (Thorlabs)  
515 continuum lamp. The transmission spectrum (Figure 3) has been compensated for the  
516 cuvette reflectivity and PMMA absorption.

517

## 518 **3D standard cell culture samples**

519 Compressed type I collagen hydrogels (RAFT UK) were used as standardized samples for  
520 testing stain compatibility with tissue processing and for quantification of shine-through.  
521 Samples were prepared in a 24 wellplate using the protocol described by the manufacturer,  
522 with the addition of SW1222 colorectal cancer cells at 100,000 cells/mL (57). Samples were  
523 fixed with 4% PFA for 20 mins. Post-fixation, cell nuclei were stained with the addition of  
524 HCS nuclear mask deep red 2  $\mu$ L/mL in PBS incubated for 30 mins. Samples were then  
525 processed for MF-HREM as described in Table 1.

526

## 527 **Resin testing**

528 Multiple candidate resins were tested for setting time, compatibility with opacifying agents  
529 final block hardness and quality of cut. Resins used were Technovit 7100 (Heraeus Kulzer,  
530 Germany), Technovit 8100 (Heraeus Kulzer, Germany), Spurr resin (Polysciences Inc,  
531 USA), LR White (Sigma-Aldrich, USA) and Lowicryl HM20 (Polysciences Inc, USA).  
532 Technovit 7100 is a 2-hydroxyethyl methacrylate-based plastic resin, and was prepared  
533 using 1 g Technovit 7100 hardener 1 dissolved in 100 mL Technovit 7100 resin. Technovit  
534 7100 hardener 2 was used to catalyze the polymerisation reaction, added in a ratio of 1:15  
535 Hardener 2 to resin.

536 Technovit 8100 had a similar composition: 0.5 g of Technovit 8100 Hardener 1 dissolved in  
537 100 mL Technovit 8100 resin. The catalyst, Technovit 8100 Hardener 2, was added in a  
538 ratio of 1:30 catalyst to resin.

539 Spurr is an epoxy resin, and was prepared using 4.1 g ERL, 1.43 g diglycidyl ether of  
540 polypropylene glycol, 5.9 g nonenylsuccinic anhydride and 0.1 g dimethylaminoethanol  
541 accelerator.

542 LR White is an acrylic resin and was prepared using 2 g benzoyl peroxide accelerator per  
543 100 mL resin.

544 Lowicryl HM20, a methacrylate resin, was prepared with 0.6% (w/w) benzoyl peroxide  
545 accelerator.

546 Hardness testing was conducted on blocks after they had set using either a Shore  
547 durometer D or Shore durometer A. Cut quality was assessed by imaging a block with a  
548 mouse kidney embedded and counting the number of slices which had areas of flaky resin  
549 or voids.

550

## 551 **Image post-processing and analysis**

552 Image analysis was carried out using a combination of ImageJ (Fiji distribution)(36), Vaa3D  
553 (40–42), Python and Amira.

554

555

556 **Shine-through analysis**

557 Shine through analysis was performed in Fiji and Matlab as follows:

558 Gel image stacks were down-sampled in xy to create isotropic voxels, background  
559 subtraction using rolling-ball algorithm with 50 pxl radius, and sliding parabola was used to  
560 remove autofluorescent background. Image stacks were resliced into xz stacks. Single  
561 isolated cells were manually found in the stack and an ROI was drawn to fully enclose all  
562 pixels with intensity above the background. The intensity profile of the ROI was calculated by  
563 averaging the intensity over the ROI columns (z-direction). This average signal was  
564 truncated at the maximum intensity and fit to a single exponential model in Matlab using a  
565 non-linear least squares approach, with start values of 0.5 for  $I_0$  and  $\tau$  and limits of  $\pm \infty$  (other  
566 start values were checked and no difference to final fit parameters was found).

567

568 **Post processing of image stacks:**

569 Spectral unmixing was performed via the Fiji plugin as per the documentation (58).

570 Background subtraction was performed using a rolling-ball algorithm with sliding parabola  
571 using a window size dependent on the smallest features of interest in the image stack.

572 Median filtering was performed using the 3D Median filter plugin in Fiji with 1 pxl window size  
573 (36).

574 Fitting of a manually extracted PSF to the model was performed in Matlab using the fitting  
575 tool box for the case of Gaussian fits. For diffraction kernel PSFs (higher magnification  
576 images) FWHM (x,y,z) were measured in the extracted PSFs. To provide a measure of the  
577 lateral spread of the PSF the area of the diffraction pattern in the xy plane t two z slices were  
578 divided by one another. The first z slice was at the FWHM (z), the second slice was the z  
579 slice just before the abrupt change to zero, (i.e. the comet end of the comet-tail artefact).

580 This is the ratio top/bottom used in DeconvolutionLab (59) to parameterise a variety of their  
581 synthetic PSFs).

582 The diffraction limited PSF was then generated using ImageJ ops (60) from microscope and  
583 sample parameters: sample refractive index  $RI_{\text{sample}} = 1.5$  for the sample (refractive index of  
584 Technovit 8100),  $RI_{\text{immersion}} = 1.0$ , NA of 0.25, offset 0  $\mu\text{m}$  working distance 150  $\mu\text{m}$  (default),  
585 xy spacing- dependent on sample pixel size, z spacing - dependent on cut thickness,  
586 wavelength – sample dependent. This PSF was measured as above and small (50 nm)  
587 manual variation in wavelength was used to iteratively optimise the PSF to match the  
588 sample.

589 Once a PSF was synthetically generated at the same size as the image stack to be  
590 deconvolved the PSF was zeroed in the lower half and background subtracted (pixel  
591 intensities less than 0.001 in 32 bit images were zeroed). This PSF was then used in the RL  
592 deconvolution algorithm of ImageJ ops using a border size of  $\frac{1}{4}$  the image size in each  
593 dimension respectively. Iteration number was tested for each sample and 20 iterations for  
594 high magnification to produce adequate deconvolution without noise enhancement. For  
595 lower magnification samples 35 iterations was necessary to produce adequate  
596 deconvolution and prevent noise enhancement.

597

598

599 **Kidney Glomeruli segmentation:**

600 Vessel tracing was performed in Vaa3D Gradient Vector Flow algorithm (40–42), with  
601 diffusion iteration of 5. Connected component analysis was performed in Amira with a  
602 threshold minimum size of 10000  $\mu\text{m}^3$  based on literature estimates for glomeruli (43). No

603 deconvolution was necessary owing to the size of the structures being imaged, by  
604 comparison to the pixel size.

605

#### 606 **Tumour vasculature segmentation:**

607 Tumour images used Gaussian PSF's for deconvolution with parameters of  $\sigma_x = \sigma_y =$   
608  $4$  and  $\sigma_z = 80$  for the Lectin-Dyelight649 channel and  $\sigma_x = \sigma_y = 4$  and  $\sigma_z = 40$  for the CMDil  
609 channel. Both used 35 iterations of the Richardson-Lucy deconvolution.

610 For tumour vasculature following deconvolution, vascular segmentation was performed  
611 using the APP2 algorithm of Vaa3D described previously (40–42,45). Parameter values  
612 were Threshold =1(auto thresholding), CNN=3, GSBT was used and other parameters were  
613 used at their default values.

614

#### 615 **Brain Structures:**

616 Brain microvasculature was deconvolved using a diffraction kernel with parameters specified  
617 above including xy pixel size of  $570 \mu\text{m}$  and z pixel size of  $1720 \mu\text{m}$  and wavelength of  $700$   
618 nm. Segmentation was in Vaa3D via the MOST tracing algorithm ,(40–42,48) using a  
619 threshold determined by Otsu threshold of 20, seed size 6 and slip size 20. White matter  
620 orientation analysis was performed using the OrientationJ plugin of Fiji with a Gaussian  
621 gradient and kernel sizes of 8 or 4 for Figures 8D and 8E respectively. HSB images were  
622 created with orientation, coherence and original image brightness as the three channels  
623 respectively.

624

#### 625 **Acknowledgements**

626 We would like to thank Craig Murdoch for the kind gift of the FaDu cell line.

627

#### 628 **Competing Interests**

629 The authors have no competing interests to declare

## 630 **References**

- 631 1. Hildebrand DGC, Cicconet M, Torres RM, Choi W, Quan TM, Moon J, et al. Whole-  
632 brain serial-section electron microscopy in larval zebrafish. *Nature*. Nature Publishing  
633 Group; 2017;545(7654):345.
- 634 2. Cai R, Pan C, Ghasemigharagoz A, Todorov MI, Förstera B, Zhao S, et al. Panoptic  
635 imaging of transparent mice reveals whole-body neuronal projections and skull-  
636 meninges connections. *Nat Neurosci*. 2019;22(2):317–27.
- 637 3. Abdeladim L, Matho KS, Clavreul S, Mahou P, Sintes J-M, Solinas, Xavier Arganda-  
638 Carreras I, et al. Multicolor multiscale brain imaging with chromatic multiphoton serial  
639 microscopy. *Nat Commun*. Springer US; 2019;in press.
- 640 4. Liebmann T, Renier N, Bettayeb K, Greengard P, Tessier-Lavigne M, Flajolet M.  
641 Three-dimensional study of Alzheimer's disease hallmarks using the iDISCO clearing  
642 method. *Cell Rep*. Elsevier; 2016;16(4):1138–52.
- 643 5. Stack EC, Wang C, Roman KA, Hoyt CC. Multiplexed immunohistochemistry,  
644 imaging, and quantitation: a review, with an assessment of Tyramide signal  
645 amplification, multispectral imaging and multiplex analysis. *Methods*. Elsevier;  
646 2014;70(1):46–58.
- 647 6. Renier N, Wu Z, Simon DJ, Yang J, Ariel P, Tessier-Lavigne M. iDISCO: a simple,  
648 rapid method to immunolabel large tissue samples for volume imaging. *Cell*. United



- 649 States; 2014 Nov;159(4):896–910.
- 650 7. Voigt FF, Kirschenbaum D, Platonova E, Pagès S, Campbell RAA, Kastli R, et al. The  
651 mesoSPIM initiative: open-source light-sheet microscopes for imaging cleared tissue.  
652 Nat Methods. 2019;
- 653 8. d’Esposito A, Sweeney PW, Ali M, Saleh M, Ramasawmy R, Roberts TA, et al.  
654 Computational fluid dynamics with imaging of cleared tissue and of in vivo perfusion  
655 predicts drug uptake and treatment responses in tumours. Nat Biomed Eng.  
656 2018;2(10):773–87.
- 657 9. d’Esposito A, Nikitichev D, Desjardins A, Walker-Samuel S, Lythgoe MF.  
658 Quantification of light attenuation in optically cleared mouse brains. J Biomed Opt.  
659 United States; 2015 Aug;20(8):80503.
- 660 10. Gleave JA, Lerch JP, Henkelman RM, Nieman BJ. A Method for 3D Immunostaining  
661 and Optical Imaging of the Mouse Brain Demonstrated in Neural Progenitor Cells.  
662 PLoS One. Public Library of Science; 2013 Aug 6;8(8):e72039.
- 663 11. Roberts TA, Hyare H, Agliardi G, Hipwell B, d’Esposito A, Ianus A, et al.  
664 Quantitation of brain tumour microstructure response to Temozolomide therapy using  
665 non-invasive VERDICT MRI. bioRxiv. 2017 Jan 1;
- 666 12. Vigouroux RJ, Belle M, Chédotal A. Neuroscience in the third dimension: Shedding  
667 new light on the brain with tissue clearing. Mol Brain. Molecular Brain; 2017;10(1):1–  
668 10.
- 669 13. Zheng T, Feng Z, Wang X, Jiang T, Jin R, Zhao P, et al. Review of micro-optical  
670 sectioning tomography (MOST): technology and applications for whole-brain optical  
671 imaging. Biomed Opt Express. Optical Society of America; 2019;10(8):4075–96.
- 672 14. Amato SP, Pan F, Schwartz J, Ragan TM. Whole Brain Imaging with Serial Two-  
673 Photon Tomography. Front Neuroanat. 2016;10(March):1–11.
- 674 15. Krishnamurthi G, Wang CY, Steyer G, Wilson DL. Removal of subsurface  
675 fluorescence in cryo-imaging using deconvolution. Opt Express. Optical Society of  
676 America; 2010 Oct 7;18(21):22324–38.
- 677 16. Seiriki K, Kasai A, Nakazawa T, Niu M, Naka Y, Tanuma M, et al. Whole-brain block-  
678 face serial microscopy tomography at subcellular resolution using FAST. Nat Protoc.  
679 Springer US; 2019;14(5):1509–29.
- 680 17. Gong H, Xu D, Yuan J, Li X, Guo C, Peng J, et al. High-throughput dual-colour  
681 precision imaging for brain-wide connectome with cytoarchitectonic landmarks at the  
682 cellular level. Nat Commun. Nature Publishing Group; 2016;7:1–12.
- 683 18. Anderson RH, Brown NA, Mohun TJ. Insights regarding the normal and abnormal  
684 formation of the atrial and ventricular septal structures. Clin Anat. United States; 2016  
685 Apr;29(3):290–304.
- 686 19. Captur G, Wilson R, Bennett MF, Luxan G, Nasis A, de la Pompa JL, et al.  
687 Morphogenesis of myocardial trabeculae in the mouse embryo. J Anat. England; 2016  
688 Aug;229(2):314–25.
- 689 20. Mohun TJ, Weninger WJ. Embedding embryos for high-resolution episcopic  
690 microscopy (HREM). Cold Spring Harb Protoc. 2012;7(6):678–80.
- 691 21. Weninger WJ, Geyer SH, Mohun TJ, Rasskin-Gutman D, Matsui T, Ribeiro I, et al.  
692 High-resolution episcopic microscopy: a rapid technique for high detailed 3D analysis  
693 of gene activity in the context of tissue architecture and morphology. Anat Embryol  
694 (Berl). Germany; 2006 Jun;211(3):213–21.
- 695 22. Geyer SH, Nöhammer MM, Tinhofer IE, Weninger WJ. The dermal arteries of the  
696 human thumb pad. J Anat. 2013;223(6):603–9.
- 697 23. Matsui H, Ho SY, Mohun TJ, Gardiner HM. Postmortem high-resolution episcopic

- 698 microscopy (HREM) of small human fetal hearts. *Ultrasound in obstetrics &*  
699 *gynecology : the official journal of the International Society of Ultrasound in Obstetrics*  
700 *and Gynecology*. England; 2015. p. 492–3.
- 701 24. Rosenthal J, Mangal V, Walker D, Bennett M, Mohun TJ, Lo CW. Rapid high  
702 resolution three dimensional reconstruction of embryos with episcopic fluorescence  
703 image capture. *Birth Defects Res Part C Embryo Today Rev*. Wiley Online Library;  
704 2004;72(3):213–23.
- 705 25. Weninger WJ, Mohun TJ. Three-dimensional analysis of molecular signals with  
706 episcopic imaging techniques. *Methods Mol Biol*. United States; 2007;411:35–46.
- 707 26. Tainaka K, Murakami TC, Susaki EA, Shimizu C, Saito R, Takahashi K, et al.  
708 Chemical landscape for tissue clearing based on hydrophilic reagents. *Cell Rep*.  
709 Elsevier; 2018;24(8):2196–210.
- 710 27. Kim JH, Jang MJ, Choi J, Lee E, Song K--D, Cho J, et al. Optimizing tissue-clearing  
711 conditions based on analysis of the critical factors affecting tissue-clearing  
712 procedures. *Sci Rep*. Nature Publishing Group; 2018;8(1):1–11.
- 713 28. Chee Tak Yeung E. *Plant Microtechniques and Protocols*.
- 714 29. Marion J, Le Bars R, Satiat-Jeunemaitre B, Boulogne C. Optimizing CLEM protocols  
715 for plants cells: GMA embedding and cryosections as alternatives for preservation of  
716 GFP fluorescence in Arabidopsis roots. *J Struct Biol*. The Author(s); 2017;198(3):196–  
717 202.
- 718 30. Yang Z, Hu B, Zhang Y, Luo Q, Gong H. Development of a Plastic Embedding  
719 Method for Large-Volume and Fluorescent-Protein-Expressing Tissues. *PLoS One*.  
720 2013;8(4):4–8.
- 721 31. Quester R, Knifka J, Schröder R. Optimization of glycol methacrylate embedding of  
722 large specimens in neurological research. Study of rat skull-brain specimens after  
723 implantation of polyester meshes. *J Neurosci Methods*. 2002;113(1):15–26.
- 724 32. Gang Y, Liu X, Wang X, Zhang Q, Zhou H, Chen R, et al. Plastic embedding  
725 immunolabeled large-volume samples for three-dimensional high-resolution imaging.  
726 *Biomed Opt Express*. Optical Society of America; 2017;8(8):3583–96.
- 727 33. Wallace W, Schaefer LH, Swedlow JR. A workingperson's guide to deconvolution in  
728 light microscopy. *Biotechniques*. Future Science; 2001;31(5):1076–97.
- 729 34. de Monvel JB, Scarfone E, Le Calvez S, Ulfendahl M. Image-adaptive deconvolution  
730 for three-dimensional deep biological imaging. *Biophys J*. United States; 2003  
731 Dec;85(6):3991–4001.
- 732 35. Sternberg SR. *Biomedical image processing*. Computer (Long Beach Calif). IEEE;  
733 1983;(1):22–34.
- 734 36. Schindelin J, Arganda-Carreras I, Frise E, Kaynig V, Longair M, Pietzsch T, et al. Fiji:  
735 an open-source platform for biological-image analysis. *Nat Methods*. United States;  
736 2012 Jun;9(7):676–82.
- 737 37. Jafree DJ, Moulding D, Kolatsi-Joannou M, Tejedor NP, Price KL, Milmoie NJ, et al.  
738 Spatiotemporal dynamics and heterogeneity of renal lymphatics in mammalian  
739 development and cystic kidney disease. *Elife*. eLife Sciences Publications Limited;  
740 2019;8:e48183.
- 741 38. Li W, Germain RN, Gerner MY. Multiplex, quantitative cellular analysis in large tissue  
742 volumes with clearing-enhanced 3D microscopy (Ce3D). *Proc Natl Acad Sci*. National  
743 Academy of Sciences; 2017;114(35):E7321--E7330.
- 744 39. Baldelomar EJ, Charlton JR, Beeman SC, Hann BD, Cullen-McEwen L, Pearl VM, et  
745 al. Phenotyping by magnetic resonance imaging nondestructively measures  
746 glomerular number and volume distribution in mice with and without nephron

- 747 reduction. *Kidney Int.* United States; 2016 Feb;89(2):498–505.
- 748 40. Peng H, Bria A, Zhou Z, Iannello G, Long F. Extensible visualization and analysis for  
749 multidimensional images using Vaa3D. *Nat Protoc.* England; 2014 Jan;9(1):193–208.
- 750 41. Peng H, Ruan Z, Long F, Simpson JH, Myers EW. V3D enables real-time 3D  
751 visualization and quantitative analysis of large-scale biological image data sets. *Nat*  
752 *Biotechnol.* Nature Publishing Group; 2010;28(4):348.
- 753 42. Peng H, Tang J, Xiao H, Bria A, Zhou J, Butler V, et al. Virtual finger boosts three-  
754 dimensional imaging and microsurgery as well as terabyte volume image visualization  
755 and analysis. *Nat Commun.* 2014;5(1):4342.
- 756 43. Klingberg A, Hasenberg A, Ludwig-Portugall I, Medyukhina A, Männ L, Brenzel A, et  
757 al. Fully Automated Evaluation of Total Glomerular Number and Capillary Tuft Size in  
758 Nephritic Kidneys Using Lightsheet Microscopy. *J Am Soc Nephrol.* American Society  
759 of Nephrology; 2017;28(2):452–9.
- 760 44. Friedl P, Wolf K. Tumour-cell invasion and migration: diversity and escape  
761 mechanisms. *Nat Rev Cancer.* 2003;3(5):362–74.
- 762 45. Xiao H, Peng H. APP2: automatic tracing of 3D neuron morphology based on  
763 hierarchical pruning of a gray-weighted image distance-tree. *Bioinformatics.* England;  
764 2013 Jun;29(11):1448–54.
- 765 46. Magdeldin T, López-Dávila V, Pape J, Cameron GWW, Emberton M, Loizidou M, et  
766 al. Engineering a vascularised 3D in vitro model of cancer progression. *Sci Rep.*  
767 Nature Publishing Group; 2017;7(October 2016):1–9.
- 768 47. Bennett RE, Robbins AB, Hu M, Cao X, Betensky RA, Clark T, et al. Tau induces  
769 blood vessel abnormalities and angiogenesis-related gene expression in P301L  
770 transgenic mice and human Alzheimer's disease. *Proc Natl Acad Sci.*  
771 National Academy of Sciences; 2018;115(6):E1289–E1298.
- 772 48. Ming X, Li A, Wu J, Yan C, Ding W, Gong H, et al. Rapid reconstruction of 3D  
773 neuronal morphology from light microscopy images with augmented rayburst  
774 sampling. *PLoS One.* Public Library of Science; 2013 Dec 31;8(12):e84557–e84557.
- 775 49. Zhang X, Yin X, Zhang J, Li A, Gong H, Luo Q, et al. High-resolution mapping of brain  
776 vasculature and its impairment in the hippocampus of Alzheimer's disease mice. *Natl*  
777 *Sci Rev.* 2019;6(6):1223–38.
- 778 50. Todorov MI, Paetzold JC, Schoppe O, Tetteh G, Efremov V, Völgyi K, et al.  
779 Automated analysis of whole brain vasculature using machine learning. *bioRxiv.* Cold  
780 Spring Harbor Laboratory; 2019;613257.
- 781 51. Jelescu IO, Budde MD. Design and Validation of Diffusion MRI Models of White  
782 Matter. *Front Phys.* 2017;5(November).
- 783 52. Budde MD, Frank JA. Examining brain microstructure using structure tensor analysis  
784 of histological sections. *Neuroimage.* 2012;63(1):1–10.
- 785 53. Alexander DC. Modelling, Fitting and Sampling in Diffusion MRI BT - Visualization  
786 and Processing of Tensor Fields: Advances and Perspectives. In: Laidlaw D, Weickert  
787 J, editors. Berlin, Heidelberg: Springer Berlin Heidelberg; 2009. p. 3–20.
- 788 54. Grussu F, Schneider T, Yates RL, Zhang H, Wheeler-Kingshott CAMG, DeLuca GC,  
789 et al. A framework for optimal whole-sample histological quantification of neurite  
790 orientation dispersion in the human spinal cord. *J Neurosci Methods.* 2016;273:20–  
791 32.
- 792 55. Kohl J, Ng J, Cachero S, Ciabatti E, Dolan M-J, Sutcliffe B, et al. Ultrafast tissue  
793 staining with chemical tags. *Proc Natl Acad Sci.* National Academy of Sciences;  
794 2014;111(36):E3805–E3814.
- 795 56. Workman P, Aboagye EO, Balkwill F, Balmain A, Bruder G, Chaplin DJ, et al.

- 796 Guidelines for the welfare and use of animals in cancer research. Br J Cancer. Nature  
797 Publishing Group; 2010;102(11):1555–77.
- 798 57. Lonza. RAFT 3D cell culture kit protocol [Internet]. [cited 2020 Mar 7]. Available from:  
799 [https://bioscience.lonza.com/lonza\\_bs/CH/en/raft-3d-cell-culture](https://bioscience.lonza.com/lonza_bs/CH/en/raft-3d-cell-culture)
- 800 58. Walter J. Spectral Unmixing Plugin. imageJ; 2006.
- 801 59. Sage D, Donati L, Soulez F, Fortun D, Schmit G, Seitz A, et al. DeconvolutionLab2:  
802 An open-source software for deconvolution microscopy. Methods. 2017;115:28–41.
- 803 60. Rueden, C., Dietz, C., Horn, M., Schindelin, J., Northan, B., Berthold, M. & Eliceiri K  
804 (2016). ImageJ Ops. 2016.
- 805

| Resin                 | Dehydratant | Setting temp | Oxygen | Time to set w/wo opacifying agent | Observations                                 |
|-----------------------|-------------|--------------|--------|-----------------------------------|----------------------------------------------|
| <b>Technovit 7100</b> | Ethanol     | RT           | Room   | 10(mins)/1(hr)                    |                                              |
| <b>Technovit 8100</b> | Acetone     | 4°C          | Vacuum | 10/30 (mins)                      |                                              |
| <b>Lowicryl HM20</b>  | Ethanol     | RT°C         | Room   | NA/NA                             | Did not set after 120hrs                     |
| <b>Spurr</b>          | Ethanol     | 55°C         | Room   | 1.9/2.2(hrs)                      |                                              |
| <b>LR White</b>       | Ethanol     | 55°C         | Room   | 20/23 (hrs)                       | Large amount of resin expansion upon setting |

Supplementary table1. Showing the results of the initial resin testing. Detailing the setting conditions the time to set with and without Orasol Black, and including observations.
