# Multi-fluorescence high-resolution episcopic microscopy (MF-HREM) for three dimensional imaging of adult murine organs

Claire Walsh<sup>1</sup>, Natalie Holroyd<sup>1</sup>, Eoin Finnerty<sup>1</sup>, Sean G. Ryan<sup>2</sup>, Paul W. Sweeney<sup>3,4</sup>,  
Rebecca J. Shipley<sup>4</sup>, Simon Walker-Samuel<sup>1</sup>.

1. Centre for Advanced Biomedical Imaging, University College London, 72 Huntley Street, London, WC1E 6DD, UK. 2. School of Physics, Astronomy and Mathematics, University of Hertfordshire, College Lane, Hatfield, AL10 9AB, UK. 3. Cancer Research UK Cambridge Institute, University of Cambridge, Li Ka Shing Centre, Cambridge, CB2 0RE, UK 4. Department of Mechanical Engineering, University College London, London, UK

## Abstract

Three-dimensional microscopy of large biological samples ( $>0.5 \text{ cm}^3$ ) is transforming biological research. Many existing techniques require trade-offs between image resolution and sample size, require clearing or use optical sectioning. These factors complicate the implementation of large volume 3D imaging. Here we present Multi-fluorescent High Resolution Episcopic Microscopy (MF-HREM) which allows 3D imaging of large samples without the need for clearing or optical sectioning. MF-HREM uses serial-sectioning and block-facing wide-field fluorescence, without the need for tissue clearing or optical sectioning. We detail developments in sample processing including stain penetration, resin embedding and imaging. In addition, we describe image post-processing methods needed to segment and further quantify these data. Finally, we demonstrate the wide applicability of MF-HREM by: 1) quantifying adult mouse glomeruli. 2) identifying injected cells and vascular networks in tumour xenograft models; 3) quantifying vascular networks and white matter track orientation in mouse brain.

## Introduction

Immunohistochemistry has traditionally been the primary method used to image specific proteins and structures in large ( $>1\text{cm}^3$ ) tissue samples. However, the two-dimensional nature of conventional histological slices means that the complete, and often complex, three-dimensional structure of biological tissues generally cannot be captured and investigated. Numerous efforts have been made to simplify the three-dimensional (3D) alignment of serial histological sections, but have proved to be non-trivial due to the significant distortions and misalignments that occur during sectioning and processing (1). To meet this need, several 3D fluorescent imaging techniques have been developed that are now providing data over length scales from single cells to tissues, organs and organisms (2).

As with many fluorescent imaging techniques, multiplexed fluorescence staining is a particularly powerful tool for evaluating spatial relationships between features, often enabling function to be inferred (3–5).

All 3D microscopy techniques must overcome the opacity of biological tissue caused by optical scatter of tissue structures. Approaches to this can be grouped into two categories: clearing-based, where the tissue is rendered optically transparent through delipidation and refractive index matching (6–8)(9); and serial sectioning, where the entire sample is physically cut.

42

43 Cleared samples can be imaged using techniques such as light-sheet microscopy (2,4,7)  
 44 and optical projection tomography (OPT) (10,11). However, clearing requires often complex,  
 45 lengthy and costly tissue preparation, with variable efficacy (9,12), and widely acknowledged  
 46 morphological changes to the sample (9,13). Additionally, sample size is limited by the  
 47 working distance of the microscope objective lens (7) and the objective lens must be  
 48 protected from the often corrosive clearing solutions. Resolution is also limited by the need  
 49 for broader light sheets to penetrate greater tissue depth (14).

50 Block-facing serial-sectioning, overcomes slice alignment issues by imaging the  
 51 surface of the exposed sample after each successive cut thereby creating an inherently  
 52 aligned image stack and removing the need to retain the structural integrity of individual  
 53 slices (Figure 1B). However, block-face imaging can suffer from loss of optical resolution in  
 54 the z-axis, due to contamination by out of focus light from below the block surface (shine-  
 55 through) (15). The addition of optical-sectioning capabilities such as two-photon and  
 56 structured illumination into serial sectioning instruments has aimed to overcome this issue  
 57 (3), (14), (16) (13,17), but at the cost of dramatically increasing the technical requirements  
 58 for the imaging instrument require high powered lasers and often they are custom built.  
 59

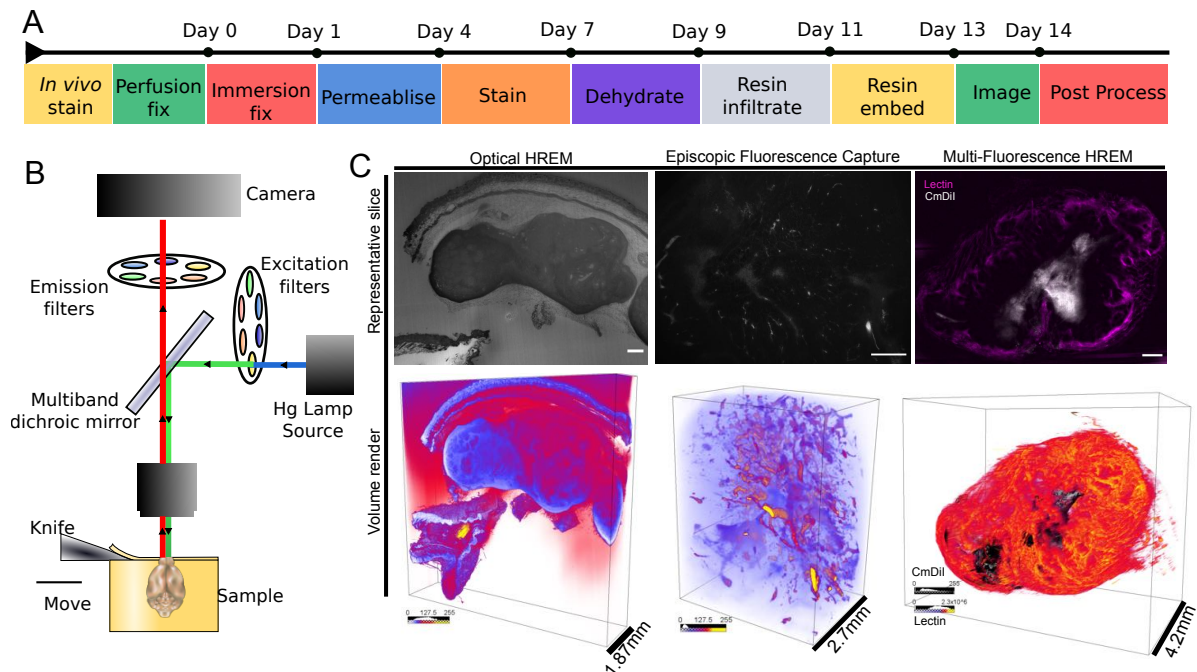

Figure 1. The MF-HREM acquisition pipeline. A) Shows the MF-HREM sample preparation, acquisition and image post-processing timeline for a typical multi-stained sample. For animal models, the sample is collected following perfusion fixation. In some cases the sample is collected following perfusion fixation, in some cases the sample is stained *in vivo*, prior to fixation. The sample is fixed overnight in PFA before being whole-mount stained (small mount stain or antibody). As almost all candidate resins are immiscible with water, samples must be dehydrated before polymerisation. Once staining is complete, the sample is dehydrated using a series of organic solvents, followed by infiltration with a three-part glycol methacrylate acrylic (GMA) resin. Finally, the sample is set within the final resin block in the desired orientation and attached to a chuck for mounting to the instrument. Sample imaging with multiple wavelength channels is automated. B) The Optical HREM instrument (Indigo Scientific, UK) consists of a fluorescent stereomicroscope with 1x objective lens (NA:0.25), and a variable zoom which provides fields of view ranging from 25 mm down to 2.3 mm. Biological samples are held within a removable sample holder under the microscope objective on a z-translational stage to enable sections to be cut with a horizontally-aligned, automated sectioning blade. Single-use tungsten carbide blades allow large samples to be cut. The sample is illuminated by a mercury vapour lamp, with separate excitation and emission filters for multiple wavelength imaging. C) Comparison of previously developed optical HREM, Episcopic fluorescent microscopy and MF-HREM on subcutaneously grown xenograft colorectal cancer tumours. Optical HREM uses Eosin B for contrast, Episcopic fluorescent microscopy uses tissue autofluorescence, while MF-HREM has used multiplexed staining of tumour vasculature and injected cells. In the case of Optical HREM, it is difficult to definitively identify any particular tumour features due to the widespread binding of Eosin B. In the autofluorescence case, blood has been left in the tumour to enhance vessel autofluorescence; whilst this appears to have been effective, it is difficult to conclusively identify bright structures and blood vessels, and only one fluorescence channel can be imaged. MF-HREM demonstrates clear vascular structure as stained by *i.v* administered lectin and initially injected cells can be clearly identified via the medium-term cell tracing dye CM-Dil. Scale bars are 500µm on 2D slices.

60  
 61  
 62  
 63

The HREM method was originally developed as a high-throughput platform for phenotyping transgenic mouse models (18–20). It was subsequently used to map gene expression (via

64 lacZ) (21), and for analysis of human tissue (22,23), and developed into a commercial  
65 instrument – Optical HREM (Indigo Scientific, UK). In these studies, the source of image  
66 contrast was eosin blocking (i.e. the property of eosin, when bound to eosinophilic proteins,  
67 to inhibit the fluorescence of unbound eosin in the embedding resin). This produces images  
68 with an appearance similar to the inverse of a traditional eosin staining in histology (shown in  
69 Figure 1C). Previously, studies have also embedded samples in (non-fluorescent) resin and  
70 used the native autofluorescence of the tissue as a source of contrast (20). This technique  
71 has only been published as applied to mouse embryos and has no potential to target specific  
72 structures or multiplex stains (shown in Figure 1C). Moreover, the resolution is far coarser  
73 than Eosin stained HREM as no post-processing solutions to recover the axial resolution  
74 have been developed (24).

75 Here, we describe the development of *multi-fluorescent* high resolution episcopic  
76 microscopy (MF-HREM), this technique allows multiplexed fluorescent imaging of large  
77 tissue samples, at high resolution, without the need to perform tissue clearing, optical  
78 sectioning or custom build an instrument. MF-HREM is a block-facing serial sectioning  
79 imaging technique (21,25), in which samples are embedded in resin and sectioned within the  
80 body of a microscope using an automated microtome blade. Wide-field multi-channel  
81 fluorescent images of the block face are acquired after every section, resulting in an  
82 inherently aligned stack of 3D fluorescent images (See Figure 1B).

83 MF-HREM offers a convenient solution to the difficulties associated with the alignment of  
84 traditional histological sections, and has enabled, for the first time, the extension of HREM to  
85 provide multiplexed fluorescence images with targeted labelling. This included the  
86 development of a MF-HREM tissue-processing, acquisition and post-processing pipeline,  
87 with the use of an opacifying agent and image deconvolution to recover axial image  
88 resolution. As MF-HREM does not need tissues to be optically cleared, it is advantageous  
89 for imaging tissue morphology (13) and can be used in conjunction with lipophilic dyes that  
90 cannot be used in solvent based clearing (26,27). For MF-HREM, lateral resolution is  
91 determined directly by the microscope objective, while axial resolution is related to both  
92 section thickness and light penetration into the block. As the block is physically sliced there  
93 is no inherent link between sample depth and resolution. A diagram of the MF-HREM  
94 pipeline is shown in Figure 1A.

95 Having developed a pipeline for preparing samples, acquiring data and image post-  
96 processing we then used MF-HREM to investigate the structure of three biological systems:  
97 1) glomeruli in adult mouse kidneys; 2) blood vessels in a mouse tumour xenograft model;  
98 and 3) cerebral vasculature and white matter tract orientation in a mouse brain.  
99 We show here that these developments greatly broaden the potential applications of HREM  
100 and provide a large-volume 3D imaging platform that is accessible to a wide range of  
101 researchers.

102

103

## 104 **Results**

105

### 106 **Comparison of embedding resins for MF-HREM**

107 MF-HREM requires samples to be embedded within a hard resin, to provide mechanical  
108 stability (stiffness) during sectioning. Various commercially-available resins are used in  
109 histology, however as these resins are designed to be manually cut and subsequently  
110 stained, they are not optimised for automated, thin sectioning, fluorescence preservation or,  
111 in many cases, large samples (28,29). We selected five commercial resins based on the

112 literature which covered the three broad chemical categories for hard resins: methacrylate  
 113 resins - Technovit 7100, Technovit 8100 and Lowicryl HM20; epoxy resin – Spurr; and  
 114 acrylic resins – LR White (28,30–32).  
 115

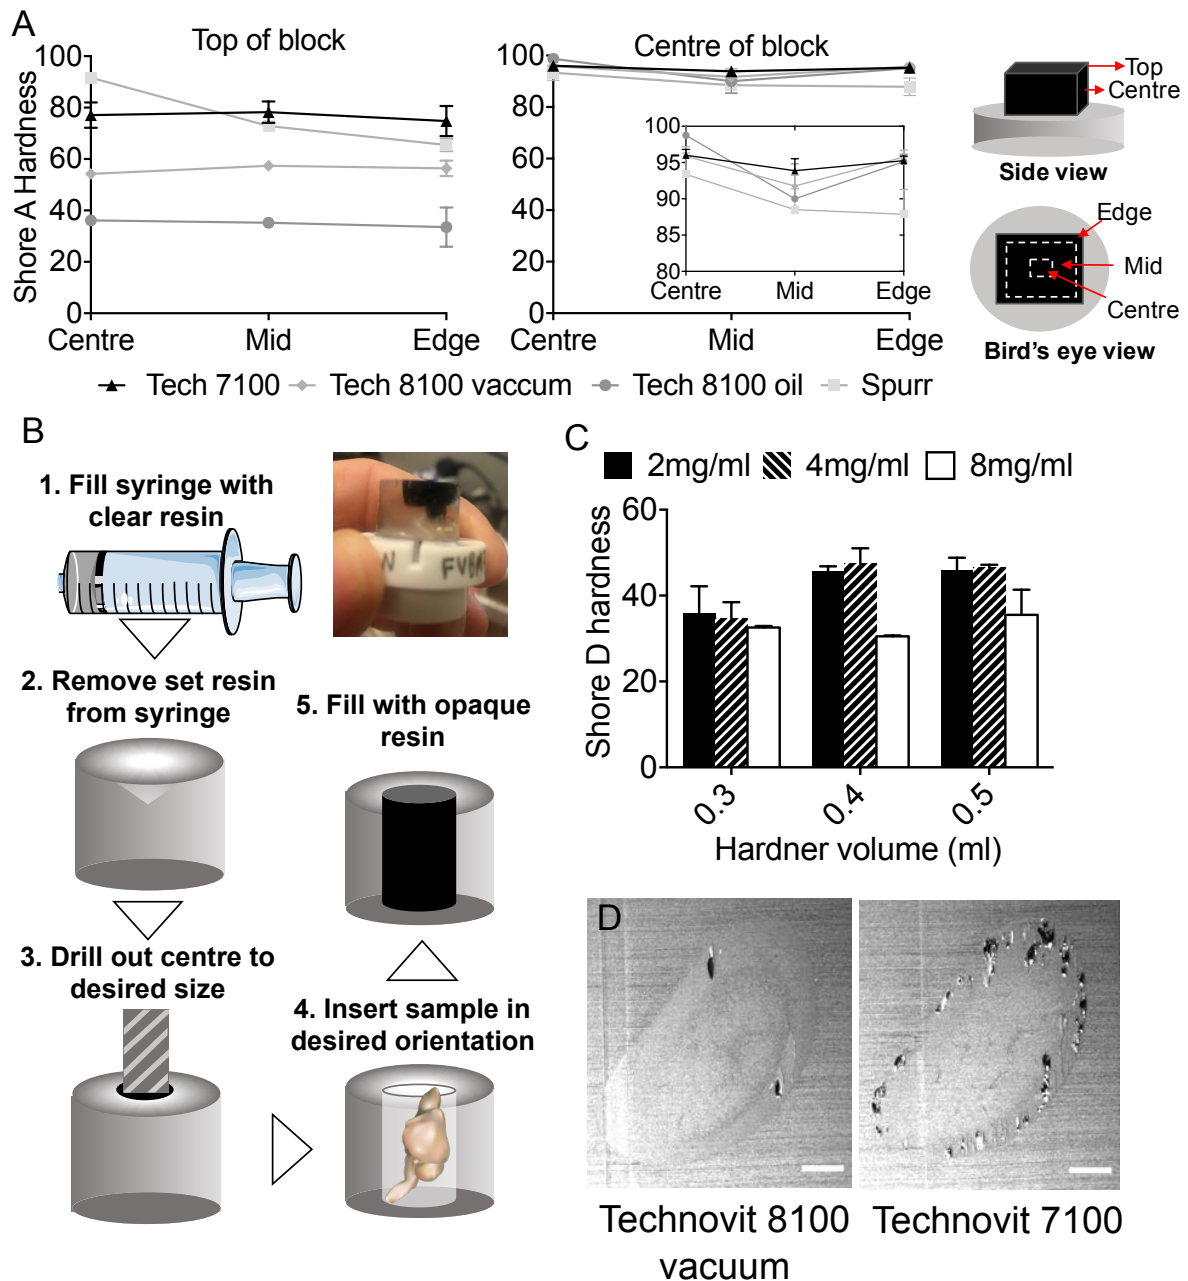

Figure 2. Characterisation of potential resins and optimisation of embedding procedure. A) Hardness measurements for 3 candidate resins (Technovit 7100, Technovit 8100 and Spurr with Technovit 8100 under two different oxygen exclusion conditions: oil or vacuum. Hardness measurements were made using a Shore Durometer A at two axial positions: top surface and block centre, and at 3 lateral positions for each axial: centre, mid and edge (as indicated in the diagram. Measurements were made in triplicate on two independent samples for each case (mean and standard deviation shown. Comparing the two graphs show that all samples had greater hardness at the centre of the block than the top of the block and at each axial position there was a gradient of decreasing hardness for Spurr resin from the centre to the edge. Technovit 8100 set under oil had the lowest hardness at the top of the block but in the centre all resins had similar measured hardness. B) Diagram showing the simple procedure for embedding samples in known orientation with Orasol Black whilst ensuring the correct FOV can be set at imaging. C) Hardness measurements for Technovit 8100 set under vacuum with three different amounts of secondary catalyst (0.3, 0.4 or 0.5 mL per 15 mL of infiltration soln.) and Orasol Black (2,4,8 mg/mL). Hardness was measured on the top of the block (axially) and in the centre of the block (laterally) with 2 replicate measures on two independent samples in each case. Results show a significant increase in hardness with increasing secondary catalyst and decreasing concentration of Orasol Black (Two-way anova  $p=0.0059$  for secondary catalyst  $p=0.0011$  for opacifying agent concentration.) D) Representative images of two samples embedded in Technovit 8100 and Technovit 7100, showing the flaky resin/voids that can be encountered more so for Technovit 7100 (scale bar =1mm).

116  
 117

118 For each resin chemical setting options rather than heat or UV were used (see methods for  
 119 more details). For resins requiring low oxygen to set (Technovit 8100) both setting under  
 120 vacuum and setting under a mineral oil layer were investigated (see methods for further  
 121 details).

122 Resins were initially assessed for the time taken to set with and without an opacifying  
 123 agent Orasol Black (see Supplementary table). LR White and Lowicryl HM20 were excluded  
 124 from further testing due to expansion during setting and slow setting (>120 hrs) respectively.  
 125 For the remaining resins — Technovit 8100, 7100 and Spurr — automated cutting  
 126 consistency and image quality were assessed. During automated cutting with the HREM,  
 127 Spurr blocks either chipped or broke. Comparisons of cut quality with embedded tissue for  
 128 Technovit 7100 and 8100 showed Technovit 7100 to have an increased incidence of ‘flaky’  
 129 resin (i.e. where resin had not fully set in the centre of the block or voids were evident) (see  
 130 Figure 2B).

131 Hardness testing of Technovit 8100 (oil or vacuum), 7100 and Spurr (Figure 2A) showed  
 132 that the top of the block was less hard than the centre of the block for all resins. For  
 133 Technovit 8100 blocks were harder when set with vacuum by comparison to mineral oil. It  
 134 was also notable that Spurr resin demonstrated a gradient of hardness from the edge of the  
 135 section to the centre.

136 Based on the above results Technovit 8100 was chosen as the candidate resin and the final  
 137 stage of resin optimisation focused on quantifying and tuning the properties of Technovit  
 138 8100 based on the amount of secondary catalyst and Orasol Black (see Figure 2C).

139 Increasing the volume of secondary catalyst or decreasing the concentration of opacifying  
 140 agent significantly increased hardness (Two-way anova  $p=0.0059$  for secondary catalyst  
 141  $p=0.0011$  for opacifying agent concentration.)

142 Based on these results, embedding protocols for various adult murine tissues, in Technovit  
 143 8100, were established and are shown in Table 1.

| Reagent                               | Embryo (upto E12.5)<br>Organoid or 3D culture | Small adult organ e.g.<br>nerve, mammary gland,<br>brain hemisphere<br>or embryo E14.5 to P1 | Large adult mouse organ<br>Heart, Liver, Kidney, Whole<br>brain, subcutaneous<br>tumour, lung | Human biopsy material<br>(greater than 1.5 cm <sup>3</sup> )<br>OR highly fibrous tissue |
|---------------------------------------|-----------------------------------------------|----------------------------------------------------------------------------------------------|-----------------------------------------------------------------------------------------------|------------------------------------------------------------------------------------------|
| Acetone 50%                           | 1hr                                           | 6hrs                                                                                         | 12hrs                                                                                         | 24 hrs (refresh at 12hrs)                                                                |
| Acetone 70%                           | 1hr                                           | 6hrs                                                                                         | 24hrs (refresh at 12hrs)                                                                      | 24 hrs (refresh at 12hrs)                                                                |
| Acetone 80%                           | 1hr                                           | 2hrs                                                                                         | 2hrs                                                                                          | 12hrs (refresh at 6hrs)                                                                  |
| Acetone 100%                          | 15mins                                        | 1hr                                                                                          | 2hrs                                                                                          | 3hrs                                                                                     |
| Acetone 100%                          | 15 mins                                       | 1hr                                                                                          | 2hrs                                                                                          | 3hrs                                                                                     |
| Acetone 100%                          | 15mins                                        | 1hr                                                                                          | 2hrs                                                                                          | 3hrs                                                                                     |
| 50:50 Acetone : infiltration<br>sol.  | 2hrs                                          | 12hrs                                                                                        | 12hrs                                                                                         | 24hrs                                                                                    |
| 25:75 Acetone : Infiltration<br>sol.  |                                               | 12hrs                                                                                        | 12hrs                                                                                         | 24hrs                                                                                    |
| 100% Infiltration solution<br>+vacuum | 2hrs<br>include opacifying agent              | 12hrs<br>include opacifying agent                                                            | 24hrs (refresh at 12 hrs) include<br>opacifying agent at sol. refresh                         | 48hrs (refresh at 24hrs)<br>include opacifying agent at<br>sol. refresh                  |
| Embed                                 | 24hrs                                         | 24hrs                                                                                        | 48hrs                                                                                         | 48hrs                                                                                    |

144  
 145

Table 1. Showing optimised timings for sample dehydration and embedding for a range of sample sizes

## 146 **Minimisation of shine-through artefact with an opacifying agent**

147 In MF-HREM, the focal plane of the microscope is the block surface, however when  
148 excitatory light is incident on the block surface some light penetrates the block and excites  
149 fluorophores deeper in the sample. Emission from these fluorophores beneath the surface is  
150 captured as out of focus light and blurs the image particularly in the axial plane. This is the  
151 same process which causes blurring for any optical imaging of thick samples, the difference  
152 for HREM (and any other serial sectioning block facing technique) being that this light comes  
153 only from below the focal plane rather than above and below (see Figure 3A). This leads to a  
154 characteristic comet-tail like artefact in the axial imaging plane as seen in Figure 3B.  
155 To reduce excitation of fluorophore beneath the block surface, we investigated the addition  
156 of an opacifying agent (Orasol Black) to the embedding resin to minimise light transmission  
157 through the block.

158 Orasol Black 45X (Stort Chemicals Ltd, Bishops Stortford, UK) is a carbon-based  
159 product used as a dye in printing industries. It was found to be soluble in all resins and  
160 organic solvents tested and did not affect the expected staining pattern for any tested stains.  
161 The powder was mixed with the resin at the last stage of resin infiltration, prior to positioning  
162 and setting the sample within the final block. Once in the block, the dye decreases shine-  
163 through by absorbing both incident, excitation light and emitted fluorescence beneath the  
164 block's surface.

165 The transmission spectrum of a relatively low concentration of Orasol Black (see  
166 Methods) is shown in Figure 3C. It has a broad absorption in the 450nm to 650nm range,  
167 with a steep increase in transmission in the near infrared range (>700nm).  
168 We investigated the decrease in shine-through with increasing Orasol Black concentration at  
169 a wavelength of 705nm and 600nm, using 3D cell cultures as standardised samples  
170 (Figure 3B). Analysis of pixel intensity for ROI's drawn around isolated cells allowed fitting of  
171 a single exponential decay model (Eq. 1) to the z distance-intensity plot (Figure 3D).  
172 estimation of the fit parameters – decay constant ( $\tau$ ), initial intensity ( $I_0$ ) and the calculation  
173 of the half-value layer  $T_{1/2} = -\log(2) / \tau$ , could then be calculated as well as goodness-of-  
174 fit.

$$175 \quad I = I_0 e^{-z/\tau} \quad (\text{Eq. 1})$$

176  
177 With increasing concentration of Orasol Black, the comet tail artefact appeared reduced and  
178 can be quantified by the decrease in both  $\tau$  and  $T_{1/2}$  (see Figure 3E). The initial intensity  $I_0$   
179 also shows a sharp decrease at 8mg/ml, and this can be seen qualitatively in the images as  
180 a decrease in the signal and a reduced signal to noise ratio.

181 The highest Orasol Black concentration (32 mg/ml) provided the greatest decrease in shine-  
182 through, but as previously discussed this affected resin polymerisation, causing the resin to  
183 set quickly, in some cases, prior to the addition of the secondary catalyst. A balance  
184 between minimising shine-through, having good signal to noise and optimum resin setting  
185 must therefore be found.

186 As expected from the transmission spectrum, shine-through was lower for HCS Cell Mask  
187 (Em 600 nm) than for HCS Nuclear Mask (Em 705 nm), for the same concentration of  
188 Orasol Black (Figure 3F).

189

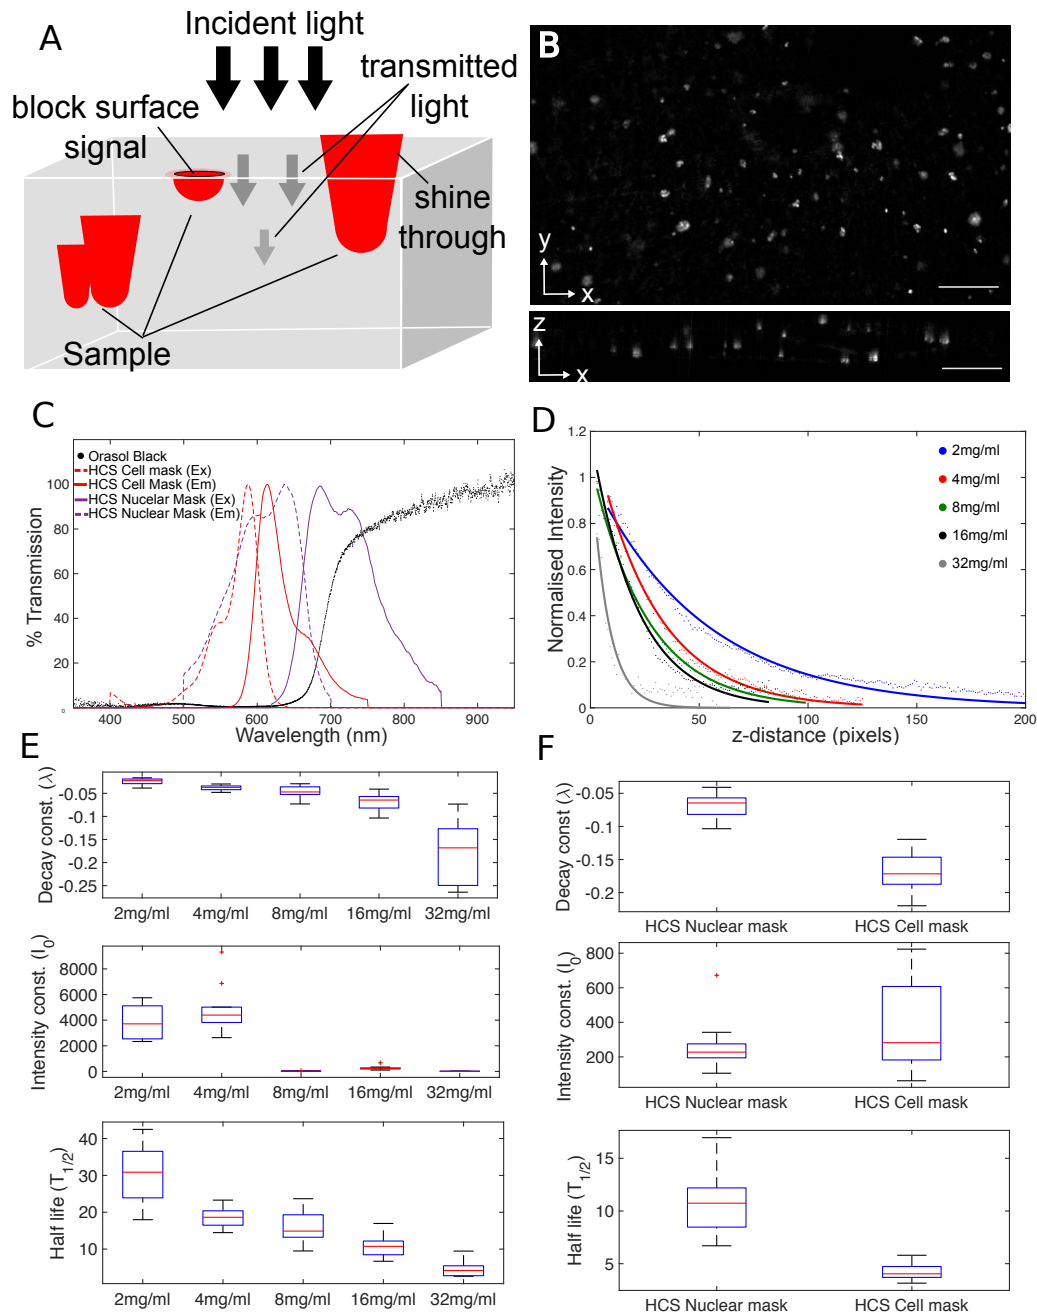

Figure 3. Characterisation of Orasol black as an opacifying agent to reduce shine-through. A) Diagram demonstrating the origin of shine through. B) Showing a representative image of cells in an in vitro 3D culture stained with HCS Nuclear Mask with 16mg/ml of Orasol Black. The comet tail artefact can be seen in the xz plane image, (scale bar is 100  $\mu$ m). C) Graph showing the measured transmission spectrum of Orasol Black, as well as two tested commercial stains HCS Nuclear Mask and HCS Cell Mask (spectrum from manufacturer). It can be seen that Orasol Black has low transmission in the 400-625 nm range which rises steeply in the 625-700 nm range. The HCS Cell mask spectrum falls almost entirely within the low transmission band of Orasol Black whereas the emission of HCS Nuclear mask falls in the section of steep increase in transmission. D) Showing a single exponential fit to the mean intensity profiles for 10 xz plane ROIs taken of single cells in 3D in vitro cell culture stained with HCS Nuclear Mask of increasing Orasol Black concentration (2,4,8,16,32 mg/ml) R2 values (0.976,0.994,0.989,0.982,0.803) respectively. E) Values of, exponential decay constant ( $\lambda$ ), initial intensity ( $I_0$ ), and half-value layer ( $T_{1/2}$ , in microns) are shown for each of the concentrations and show the expected increase in decay constant and half-value layer with increasing Orasol Black concentration. There is also a large decrease in intensity at 8 mg/ml and higher Orasol Black concentrations. F) Shows the same fitting parameters in a comparison between HCS Cell Mask stained sample and HCS Nuclear mask stained sample at 16 mg/ml Orasol Black. As expected from the transmission spectrum the decay constant and half-value layer are smaller in the HCS Cell Mask case than the HCS Nuclear Mask case.

190

191

## 192 Minimisation of shine-through artefact with image deconvolution

193 To further eliminate shine-through, and maximise the multiplexing potential in MF-HREM, we  
 194 investigated post-processing strategies to deconvolve the collected signal.

195 For any image,  $I(x,y,z)$ , we may write:

196

$$197 \quad I(x, y, z) = O(x, y, z) * h(x, y, z) + n(x, y, z) \quad (\text{Eq. 2})$$

198

199 where  $O(x,y,z)$  the object, is convolved with a point-spread function (PSF),  $h(x,y,z)$ , and  
200 additive noise,  $n(x,y,z)$ .

201 If the PSF is known and the noise well-estimated the original image can be calculated. The  
202 PSF may be: experimentally measured using sub-resolution fluorescent beads, synthetically  
203 generated it from known system parameters or estimated via blind deconvolution methods  
204 (33).

205 Deconvolution has traditionally been applied to widefield or confocal microscopy  
206 where light contamination comes from both above and below the focal plane. For MF-  
207 HREM, only light below the focal plane contaminates the image. Thus, the PSF is highly  
208 asymmetric, and not well estimated by blind deconvolution techniques or synthetically  
209 generated from widely used models. Whilst experimentally measuring the PSF is an option  
210 (15), the process is time-consuming and sometimes impossible, as it must be acquired for all  
211 wavelengths and magnifications and depends upon having high signal-to-noise ratio with  
212 small point-like sources and high similarity between the PSF measuring sample and the  
213 actual sample.

214 This is impracticable for many MF-HREM experiments and hence we have used  
215 small structures from within the image stack to parameterise a synthetically generated PSF.  
216 As opposed to directly using the extracted PSF from the image we use the small object to  
217 parameterise a symmetric synthetic PSF, using either Gaussian or diffraction kernels  
218 (dependent on the magnification). Zeroing the lower half of these synthetic PSFs then  
219 provided a good PSF estimation for deconvolution with high signal to noise ratio. The  
220 approach was successfully applied to a number of image stacks at different magnifications,  
221 wavelengths and concentrations of Orasol Black. Figures 4B and 4C show the approach for  
222 Gaussian kernel extraction and deconvolution for a small section of brain microvasculature,  
223 with a diffraction kernel.

224

### 225 **Pre-processing to improve signal to noise**

226 The Richardson-Lucy algorithm used to deconvolve the image stacks requires high signal-to-  
227 -noise ratio for effective deconvolution. Previous researchers have used pre-processing  
228 techniques to remove background and reduce noise prior to deconvolution, and this was  
229 found to be an important step to achieve effective deconvolution for MF-HREM images (34).

230 The pre-processing methods chosen were motivated by the importance to have processing  
231 that could be efficiently applied to large image stacks (>20GB). Median filtering with (1 pixel  
232 neighbourhood) was used to remove salt and pepper noise and background subtraction via  
233 a rolling-ball algorithm (35,36) was used to remove background from autofluorescence.

234 In addition to these two steps, spectral unmixing was performed for multiplexed staining,  
235 prior to deconvolution.

236 Multiplexing fluorescent stains relies on having distinct spectral excitations and emissions,  
237 and appropriate microscope filters to differentiate them. In practice, owing to the broad  
238 wavelengths over which most fluorophores are excited and emit and the imperfect nature of  
239 bandpass filters, spectral cross-talk will occur. Spectral unmixing may be used to effectively  
240 separate the contributions, improving image signal-to-noise ratio. Figure 4A shows the  
241 improvement in the signal-to-noise for a mouse brain sample that was dual stained for  
242 microvascular (Lectin – DyeLight649) and white matter (CMDil) (emission at 625 nm).



243 Spectral unmixing and background subtraction were performed using freely available  
 244 ImageJ plugins (further details in Methods) (36). Quantification of line profile signal  
 245 intensities show the improved signal-to-noise ratio.

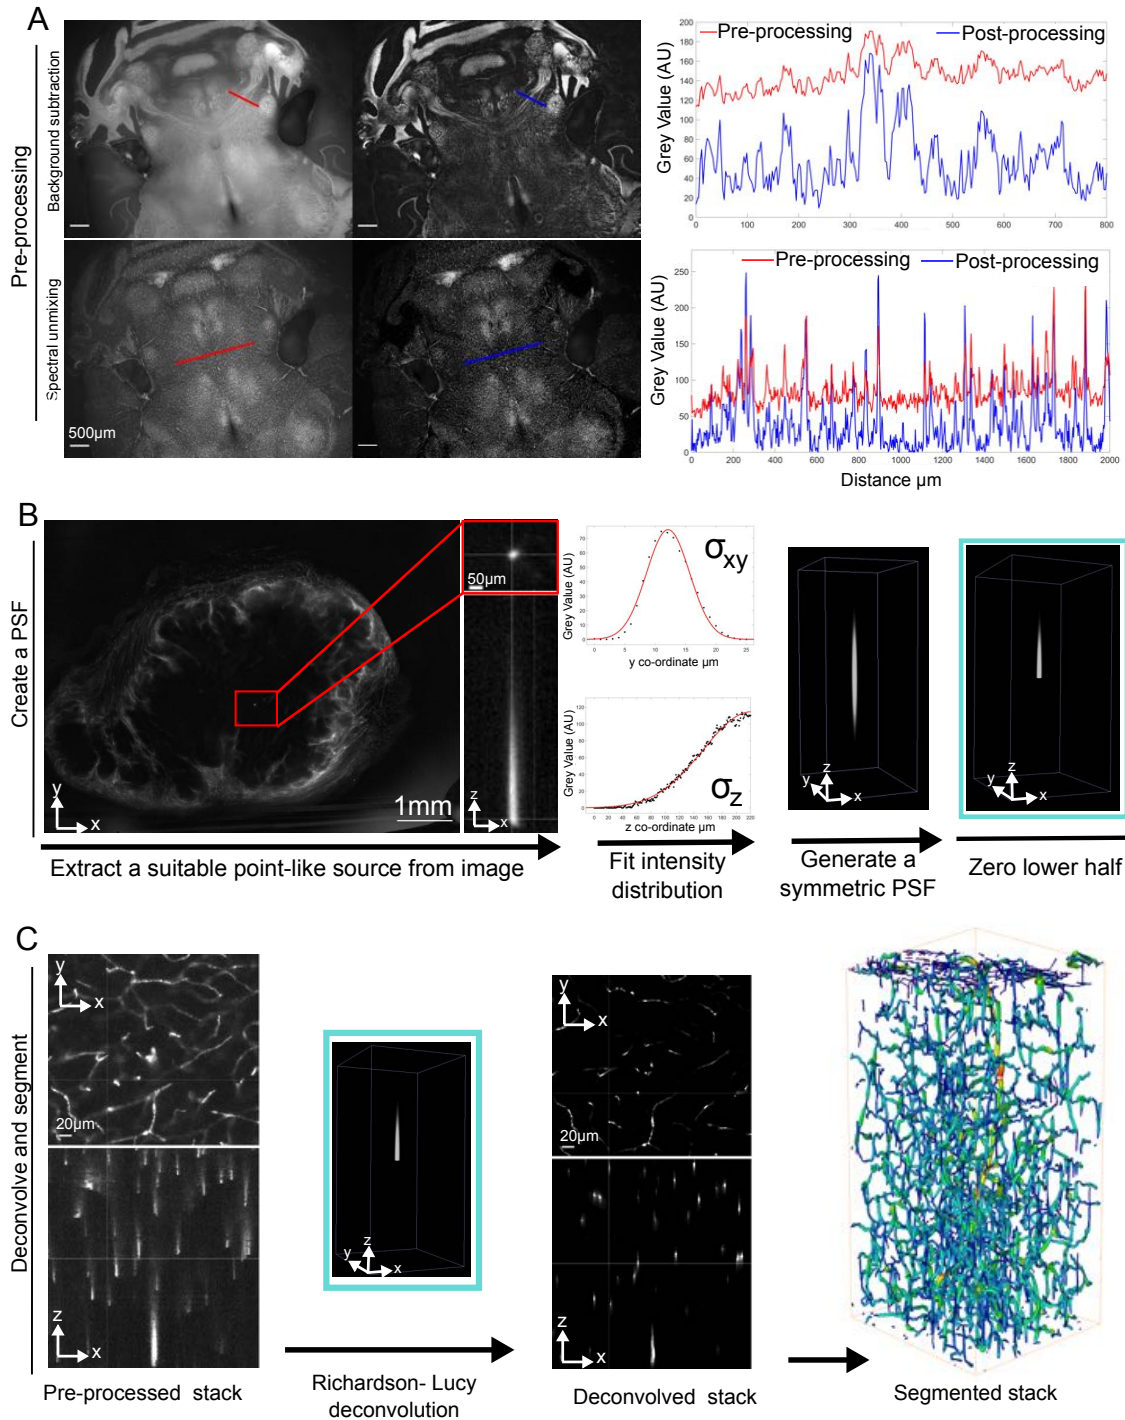

Figure 4. The Image processing pipeline. A) Showing the increase in signal-to-noise ratio achieved by pre-processing, using a rolling-ball algorithm to remove autofluorescence (upper row) and spectral unmixing to remove cross talk in multi-fluorescent image stacks (lower row). B) Showing the pipeline for the extraction of a PSF from an image stack of a subcutaneous tumour with microvasculature stained via injection of Lectin-Dyelight649. A suitable point-like source is found in the image stack, this is cropped from the image and a model PSF (in this case 3D gaussian) is fitted to the data. The parameter fits are used in the construction of a synthetic (symmetric) PSF using open source PSF generation with DeconvolutionLab2 (59) and ImageJops (60). This PSF is then half zeroed to create the final PSF. C) The deconvolution of the pre-processed image stack using the PSF. A Richardson-Lucy method with 35 iterations (60) is used to deconvolve the stack creating images that can then be segmented and quantified using various methods dependent on the biological context. In this case a MOST tracing algorithm implemented in Vaa3D (40)–(42), (48) is used to segment and skeletonise vascular networks.

## 247 **Compatibility of fluorescent stains with MF-HREM sample preparation**

248 To standardise and increase the speed of testing of fluorescent stains, we used a  
 249 standardised 3D tissue culture (see Methods for details) to test the compatibility of  
 250 commercial cell counterstains with the MF-HREM processing steps. Embedding cells in a 3D  
 251 extra-cellular matrix, and imaging at each stage of dehydration and resin infiltration, allowed  
 252 straightforward observation of fluorescence quenching or stain-target dissociation in a  
 253 controllable system. Stains were assessed regularly over a 12-hour period, as it was found  
 254 that fluorescence quenching often only became apparent after a prolonged period in  
 255 dehydratant/resin. Table 2 provides a list of tested stains and their compatibility with organic  
 256 solvents. Counter-stains for cell nucleus, cytoplasm and membrane have been identified.  
 257 The testing of Neurofilament A antibody shows the importance of correct dehydratant  
 258 selection, as it can be successfully imaged with an ethanol dehydration but not through  
 259 acetone dehydration. Also of note is the lipophilic stain CMDil which is compatible with MF-  
 260 HREM: this highly useful stain is incompatible with many clearing techniques due to the de-  
 261 lipidation step (27). Where the standard 3D culture could not easily be used, e.g. for in  
 262 vivo staining routes or specific antibodies, compatibility was tested on cryosections  
 263 from stained organs (12).

264

| Stain                                                                                          | Fluorescence retain in ethanol | Fluorescence retained in Acetone | Manufacture/Supplier and catalogue number |
|------------------------------------------------------------------------------------------------|--------------------------------|----------------------------------|-------------------------------------------|
| Eosin B                                                                                        | Yes                            | Yes                              | Sigma 45260                               |
| Eosin Y                                                                                        | (Poor solubility)              | NT                               | Sigma 230251                              |
| Acridine Orange                                                                                | Yes                            | Yes                              | Sigma A6014                               |
| Actin Green™ 488 Ready Probes                                                                  | No                             | NT                               | Thermo Fisher R37110                      |
| NucRed™ Live 647 ReadyProbes                                                                   | No                             | NT                               | Thermo Fisher R37106                      |
| CellMask™ Orange Plasma membrane Stain                                                         | No                             | NT                               | Thermo Fisher C10045                      |
| HCS CellMask™ Red Stain                                                                        | Yes                            | Yes                              | Thermo Fisher H32712                      |
| HCS NuclearMask™ Deep Red Stain                                                                | Yes                            | Yes                              | Thermo Fisher H10294                      |
| DAPI                                                                                           | Yes                            | No                               | Sigma Aldrich D9542                       |
| Invitrogen™ Lectin GS-II From <i>Griffonia simplicifolia</i> , Alexa Fluor™ 647 Conjugate      | Yes                            | Yes                              | Invitrogen™ L32451                        |
| DyLight 649 labeled Lycopersicon Esculentum (Tomato) Lectin (LEL, TL)                          | Yes                            | Yes                              | Vector DL-1178-1                          |
| Anti-Neurofilament heavy polypeptide antibody                                                  | Yes                            | No                               | Abcam ab4680                              |
| CellTracker™ CM-Dil Dye                                                                        | Yes                            | Yes                              | Invitrogen C7001                          |
| Propidium iodide                                                                               | yes                            | NT                               | Invitrogen P1304MP                        |
| SP-DiOC <sub>18</sub> (3) (3,3'-Diocadecyl-5,5'-Di(4-Sulfophenyl)Oxycarbocyanine, Sodium Salt) | Poor solubility                | Poor solubility                  | Invitrogen D7778                          |
| Wheat Germ Agglutinin, Alexa Fluor™ 647 Conjugate                                              | Yes                            | Yes                              | Invitrogen W32466                         |
| Green fluorescent protein (GFP)                                                                | No                             | No                               | NA                                        |

Table 2. Detailing trialled stains and their compatibility with ethanol or acetone dehydration

265  
266

## 267 Optimisation of stain penetration into tissue samples

268 Optical imaging techniques that rely on whole-mount staining (such as MF-HREM), require  
269 homogenous and rapid stain penetration, which can be enabled by increasing tissue  
270 permeability. We investigated four methods to increase the permeability of tissue samples  
271 for use with MF-HREM based on the literature (6,10,37,38): freeze-thaw, proteinase K (P[K])  
272 digestion, iDISCO (which combines several mild detergents (6)) and saponin (N=4). Figure 5  
273 shows the comparison of the four methods and reveals that saponin-treated samples  
274 showed significantly greater stain penetration, compared with the control case ( $p=0.04$ ). The  
275 iDISCO method increased stain homogeneity ( $p=0.055$ ) compared to control kidneys.

276 Alternative staining routes, in particular i.v. or via transcardiac perfusion, are  
277 additional and potentially far faster routes for stain administration in animal models. For  
278 vascular staining, use of i.v. injection of fluorescently-conjugated lectins is widely used to  
279 stain vasculature throughout the mouse body (8). This technique is transferrable to MF-  
280 HREM and in Figure 6, Figure 7 and Figure 8, we show the use of fluorescently conjugated  
281 lectin administered via tail vein i.v. in mouse kidney, xenograft tumour and brain  
282 respectively. Additionally, using the post-processing tool box we segment and quantify  
283 vascular structures in all three cases.

284

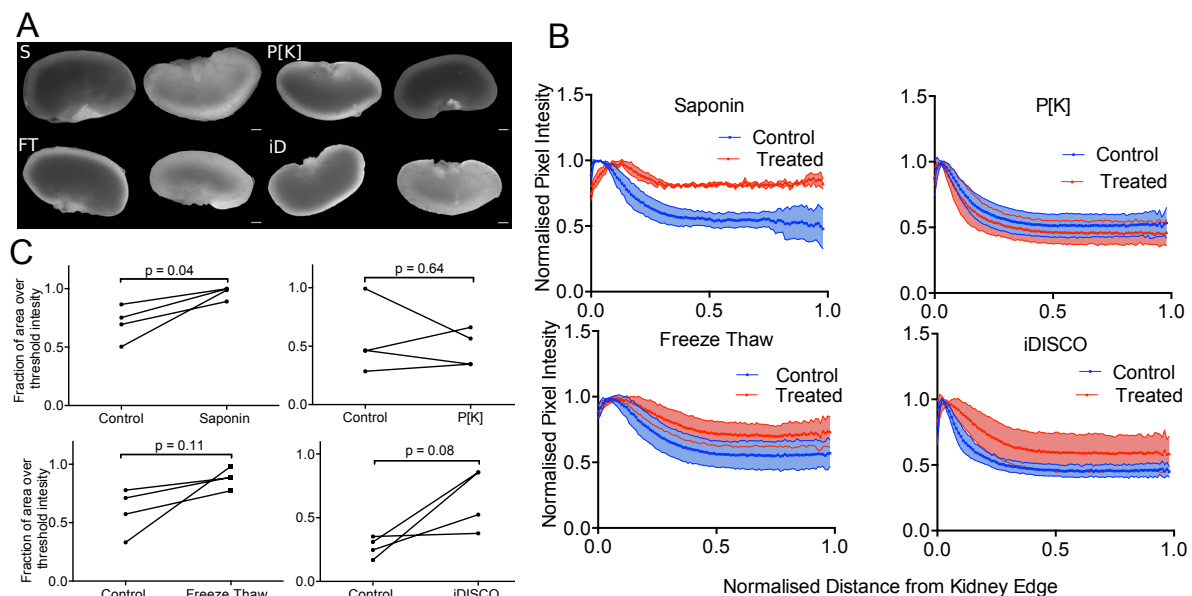

Figure 5. Optimisation of stain penetration in adult mouse kidney samples. Four methods for improving stain penetration are compared: saponin treatment, proteinase [K] digestion, freeze-thaw and iDISCO. For each method, four treated and four control kidneys were investigated, where one kidney from each animal was used as a control for the contralateral kidney. A) shows representative images of the kidneys with the control (contralateral kidney on the left and the treated kidney on the right (scale bar, 1 mm). B) shows the normalised PC-HREM signal intensity profile as a function of radial distance from the kidney centre. C) shows the fractional area of the kidney section image, above a threshold value (the same threshold was used for each treated kidney and matched control). Results of paired t-test analysis demonstrates that saponin treatment significantly increased stain penetration ( $p<0.05$ ).

285

286

## 287 Imaging glomeruli in adult mouse kidney with MF-HREM

288 Having developed the sample processing, image acquisition and post-processing pipeline,  
289 we imaged a range of samples to demonstrate the potential utility of MF-HREM and to  
290 provide comparison to other 3D optical imaging modalities. The three-dimensional structure  
291 of glomeruli, networks of small vessels in the cortex of the kidney, have been shown to be a  
292 biomarker of renal and cardiovascular disease (39). Using a lectin-Dyelight649 conjugate  
293 (Ex/Em 649/670 nm) to stain glomeruli, we acquired MF-HREM data in wild-type, adult  
294 mouse kidneys (Figure 6). After image processing steps described above, glomeruli were

295 segmented using a gradient vector flow segmentation technique implemented in Vaa3D(40–  
296 42). This algorithm is a widely used extension to a traditional active contour segmentation  
297 technique, where the external energy term in the traditional active contour algorithm is  
298 replaced with the gradient vector flow field. After segmentation, the kidney cortex was  
299 manually labelled (Figure 6A) and any structures segmented that were not within the cortex  
300 were removed. The final step used a connected components analysis and filters any small  
301 objects from the data.

302 The MF-HREM analysis revealed a glomeruli distribution that was consistent with  
303 their known spatial distribution and with other measures for wild-type (WT) adult mice  
304 performed with light sheet or in vivo MRI (39,43) MF-HREM pixel size was 2.17  $\mu\text{m}$  lateral  
305 and 2.58  $\mu\text{m}$  axial, enabling identify glomeruli which had a minimum volume of  $24 \times 10^5 \mu\text{m}^3$ .  
306

### 307 **Imaging tumour blood vessels and cell invasion with MF-HREM**

308 Tumours have notoriously complex blood vessel networks, and three-dimensional imaging  
309 has become a useful method to image their complexity and to study drug delivery (8).  
310 Additionally, understanding tumour cell invasion has implication for understanding tumour  
311 metastasis and potential treatment targets (44). Figure 7 shows MF-HREM imaging of a  
312 subcutaneous xenograft tumour mouse model, initiated from the FaDu human breast cancer  
313 cell line. Tumour cells were labelled prior to injection with CM-Dil, a medium-term  
314 fluorescent cell-tracking dye that endures for approximately four cell divisions, and is  
315 transferred through cell division but not cell-cell contact, (Ex/Em 553/570 nm). Tumour  
316 vasculature was stained by i.v. administration of fluorescent Lectin-Dyelight649 (Ex/Em  
317 649/670 nm) conjugate. Figure 7A and B show a representative 2D slice with the both stains  
318 visible and the 3D reconstruction of the data in both channels.

319 These data reveal the dense, branching vasculature at the periphery of the tumour, and the  
320 labelled cells primarily in the tumour centre, which appeared to be non-perfused. The inset  
321 to Figure 7A shows yellow arrows marking what seem to be individual or small clusters of  
322 cells in a section of tumour where a group of cells is slightly separate from the main tumour  
323 bulk.

324 This section of tumour when analysed in 3D with the full MF-HREM pre-processing  
325 pipeline (Figure 7C) allows the individual cells to be clearly located (yellow arrows) and their  
326  $x, y, z$  locations described. Whilst it is unclear whether labelled cells are viable (which would  
327 require a different reporter strategy) these results demonstrate the ability of MF-HREM to  
328 quantify the 3d location of injected cells in tissue volumes  $\sim 1\text{cm}^3$  several weeks after  
329 injection.

330 For the vascular channel, Figure 7D, E and F show the MF-HREM image processing  
331 pipeline, with the final vessel segmentation and skeletonisation being carried out using the  
332 APP2 algorithm from the Vaa3D neuron tracing plugin (40–42,45). The chaotic nature of the  
333 vasculature can be seen from this analysis and such vascular networks can be used in  
334 simulations of drug delivery (8) and for understand tumour vessel growth mechanism (46).  
335

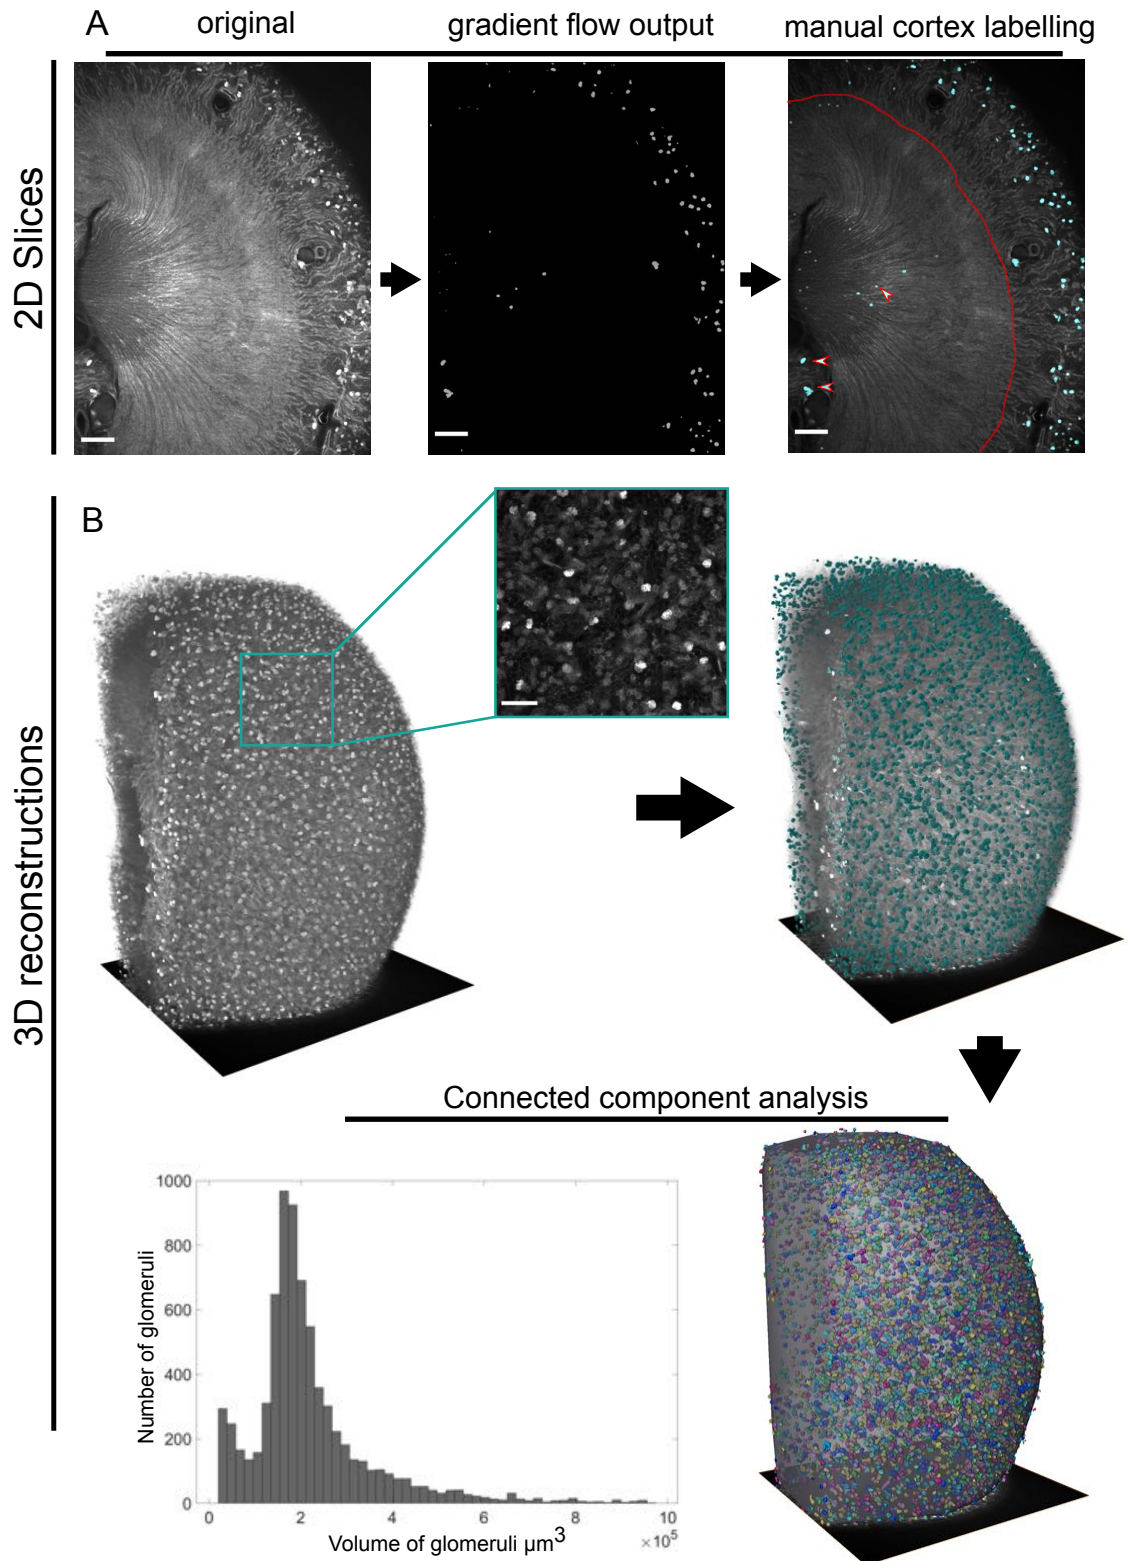

Figure 6. Showing the Lectin-Dyelight649 channel of a multi-stained murine kidney and quantification of glomeruli. A) From left to right 2D slices showing: the original image, the segmentation produced by gradient vector flow algorithm, and finally, the manual correction to remove structures that are segmented (white/red arrows) but fall outside the kidney cortex (red line). Scale bars 500  $\mu\text{m}$  for all 2D slices. B) 3D details of the image processing. The original image stack with inset showing the detail which can be seen on the kidney surface (scale bar 200  $\mu\text{m}$ ), then the segmentation via gradient flow algorithm in Vaa3D (40)–(42) and manual exclusion of points not in the cortex. The final step is the outcome of the connected components analysis and hence quantification of glomeruli number, and volume distribution. These data show the expected distribution and size of glomeruli for healthy WT mouse as compared with other techniques(39), (43) .

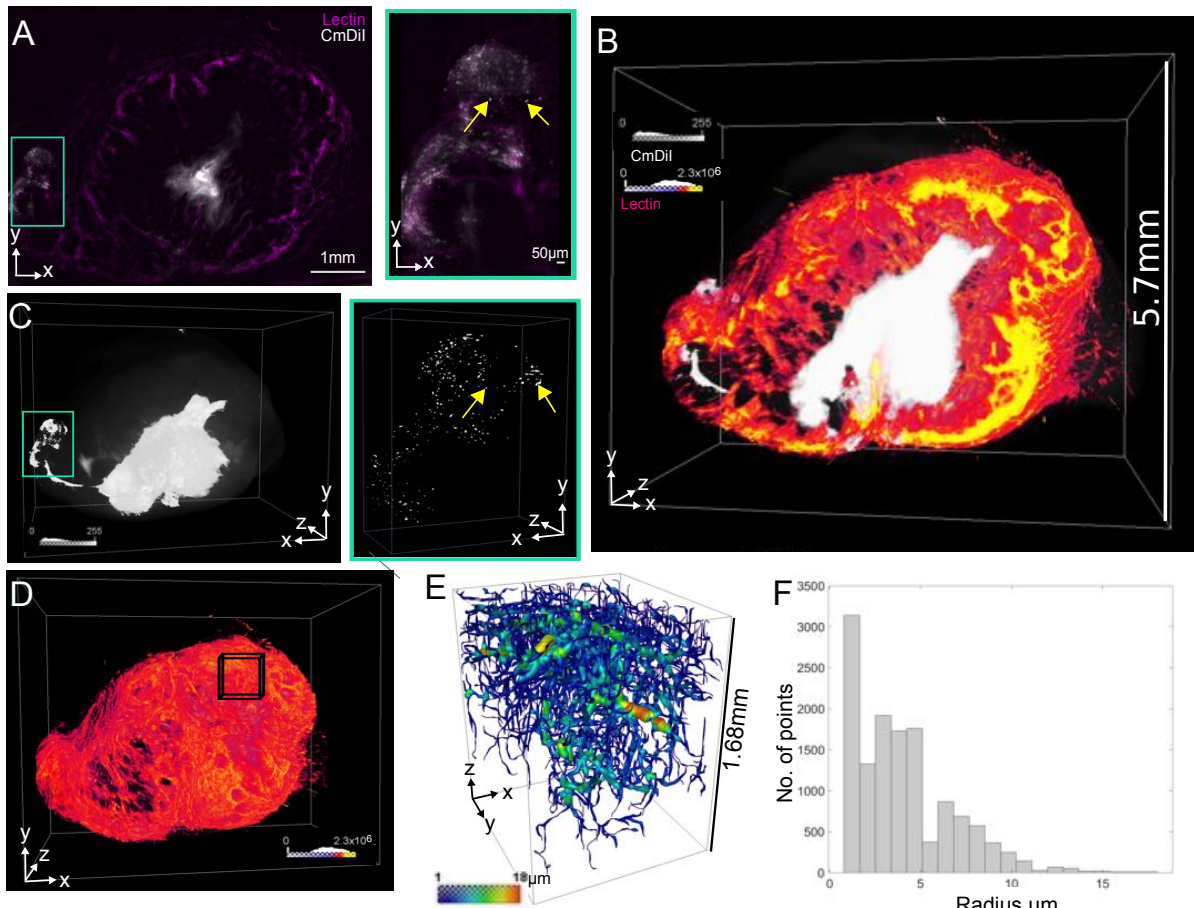

Figure 7. Xenograft tumour model analysis. A) Showing a single representative slice with the two stains: CMDil for injected cell tracking (white), and Lectin-Dyelight 649 conjugate for microvascular staining (magenta). The inset shows a digitally zoomed in portion of the image where small approx. circular structures of cell size are indicated by yellow arrows. B) A 3D rendering of the two channels shows the tumour in its totality with a cut through to show the spatial arrangement of the injected cells within the vascular network. The highly perfused rim can be clearly seen. C) Showing a 3D rendering of the CMDil channel only and the extent of the cell migration from the initial injecting. The inset shows the same group of cells as in A, deconvolved and rendered in 3D. The yellow arrows indicate the same structures as the 2D case which can more clearly be seen to be single cell or small clusters. The 3D position of these clusters is available from such image data. D) The 3D rendering of the vascular network. E) The extraction and segmentation of a section of the vascular network following the PSF extraction described earlier. In this case the APP2 algorithm from the Vaa3D neuron tracing plugin set was used to segment and skeletonise the deconvolved image stack (40)–(42), (45). F) Shows the histogram of the vessel radii from E.

338

339

340

## Imaging brain microvasculature and white matter tracts in a mouse brain with MF-HREM

341

342

343

344

The three-dimensional spatial distributions of many brain structures including vasculature cells and white matter are of key importance for understanding healthy brain function and changes in these features are used as biomarkers for a large number of neurological pathologies such as Alzheimer's (4,47).

345

346

347

348

349

350

Probing these structures in 3D with MF-HREM can provide insight into many of these conditions and may also provide validation for other clinical imaging tools such as MRI. Figure 8 shows the application of MF-HREM in two instances: where a brain is dual labelled with CMDil as a white matter-marker and lectin-Dyelight649 as a microvascular stain (figure 8A-E); and where a brain is dual labelled with CMDil as a white-matter marker and HCS Nuclear Mask as a marker for cell distribution (Ex/Em 638686) (Figure 8F-8H).

351

352

353

354

355

Figure 8B shows a high-resolution sub-volume of the vasculature segmented using the MF-HREM processing pipeline and the MOST tracing algorithm implemented in Vaa3D is used. This algorithm is a rayburst sampling algorithm implemented in a marching fashion (48). The microvasculature can be seen to have a large population of vessels with similar radius (1-4  $\mu\text{m}$ ) and a small number of descending vessels with larger radius ( $\sim 10 \mu\text{m}$ ). This

356 distribution is similar to the mean radius measured in other serial sectioning modalities e.g.  
357 MOST (49) and for clearing techniques (50) although no large vessels ( $>10\ \mu\text{m}$ ) are present  
358 in MF-HREM data, due to the preferential binding of lectin to microvasculature over larger  
359 vessels as noted previously (50).

360 Another important feature of brain microstructure is tissue orientation particularly for  
361 white matter which is routinely measured in clinical settings using diffusion weighted MR  
362 (DW-MR). This technique measures brain microstructure based on the constrained diffusion  
363 of water within the tissue structures. Despite its widespread use for white-matter  
364 tractography, the validation of DW-MR is a much discussed issue (51–53). Performing  
365 validation requires high-resolution images over large fields of view which must be registered  
366 to MR images if quantitative validation is to be performed. Previously CMDil has been used  
367 on individual histological sections of mouse brain to validate tractography from DW-MR  
368 (52,54). Whilst this approach is somewhat successful, it is difficult or even impossible to fully  
369 align 2D section with the corresponding MR sections. Figure 8D and 8H show white matter  
370 orientation. Orientation is calculated from the structure tensor of the image. A Gaussian  
371 gradient and 8pxl window size were used in 8D while a 4pxl window size was used in Figure  
372 8H to reflect the different pixel sizes of the images. The hue, saturation and brightness  
373 denote the orientation, coherence and original image brightness respectively. The colour bar  
374 shows the angle represented by the hue. Figure 8E shows a polar histogram of the  
375 orientation in Figure 8D where all orientations with a coherence greater than a threshold  
376 value of 0.2 are displayed. It can be seen there appears to be an even distribution of local  
377 orientations over this sub volume.

378 CMDil effectively stains white matter tracts due to its lipophilic nature and MF-HREM  
379 allows orientation analysis on the entire 3D volume.  
380 Such images, particularly the whole brain in Figure 8H, are ideal for validation of MRI  
381 tractography data. Tissue clearing techniques are also often unsuitable for this application  
382 as lipophilic dyes are often not retained through the de-lipidation stage of clearing protocols  
383 (27).

384 In addition to white matter, cell distributions are important markers for development  
385 and disease. Figure 8G shows a single slice at a higher magnification from the imaging  
386 volume in Figure 8F, cell nuclei can be clearly seen and show Nuclear staining has  
387 successfully been retained through processing. Further segmentation requires montaging of  
388 higher resolution images.

389  
390

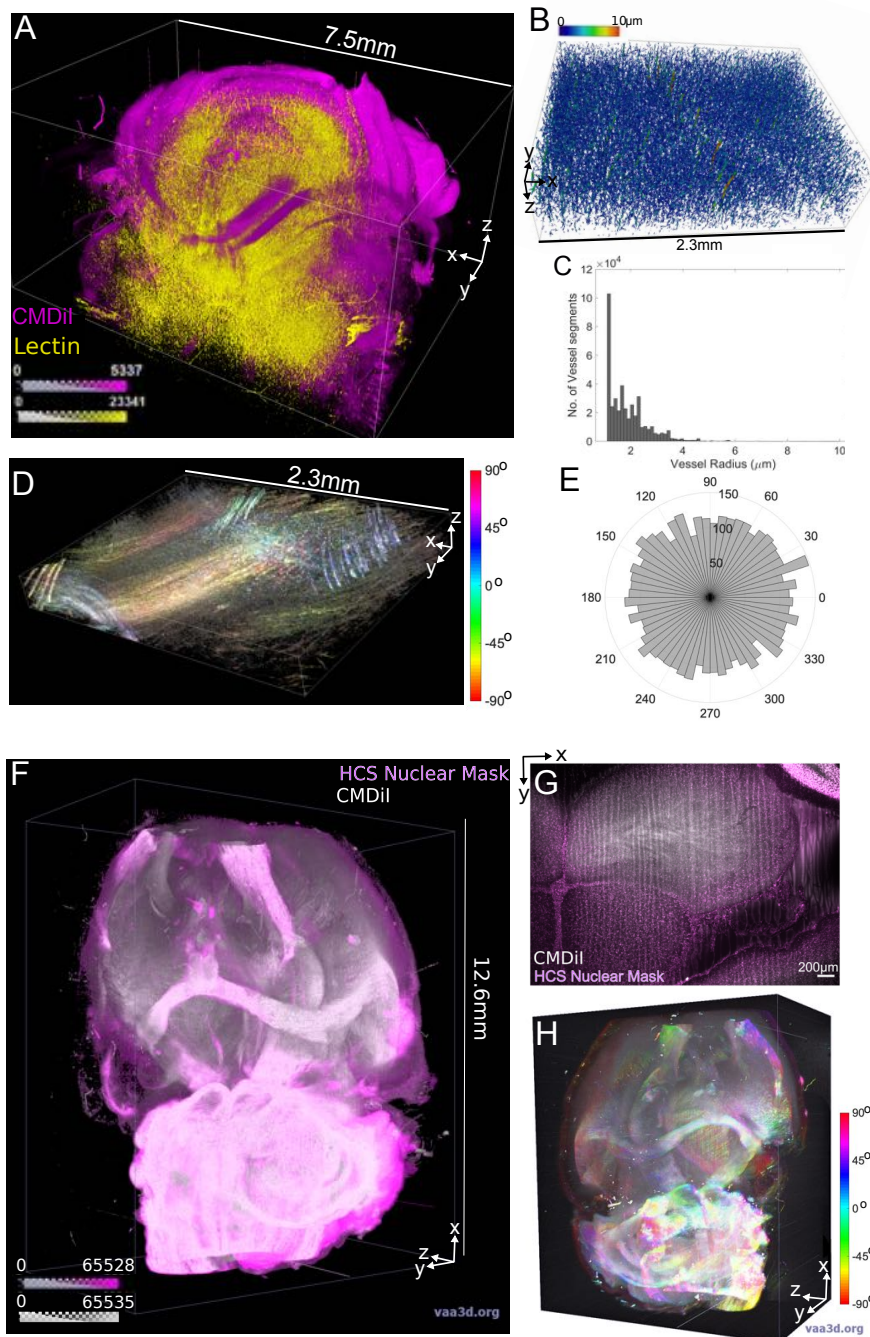

Figure 8. MF-HREM of Two brain samples, one stained with CMDiI Ex/Em 553/570nm and Lectin-Dyelight 649 (Ex/Em 649/700) and a second stained with CMDiI and HCS Nuclear Mask (Ex/Em 638/686). A) Showing the volume overlay of both the CMDiI (Magenta) and the Lectin (yellow). Colour bars show pixel intensity. B) Shows a high resolution sub-volume of the vasculature channel successfully segmented and skeletonised using the MF-HREM processing pipeline and the MOST tracing algorithm implemented in Vaa3D. C) Shows the histogram of radii distributions. D) Shows the same sub-volume in the CMDiI-white matter channel, here an orientation analysis has been performed via calculation of the structure tensor of the image using a Gaussian gradient and 8pxl window size. The hue, saturation and brightness denote the orientation, coherence and original image brightness respectively. The colour bar shows the angle represented by the hue. E) Shows a polar histogram of D where all orientations with a coherence greater than a threshold value of 0.2 are displaced. It can be seen there appears to be an even distribution of local orientations over this sub volume. F) Shows a volume overlay of the CMDiI channel (White) and the HCS nuclear mask channel (magenta) for a different brain sample. G) shows a single slice imaged at higher resolution in which nuclei can be clearly seen. H) demonstrates white matter orientation over the whole brain. It was computed as in D but using a smaller window size of 4pxls. The orientation can be seen to clearly follow the expected white-matter tracts.

391

392

## 393 Discussion

394 In this work, we have shown the development of MF-HREM through sample preparation,  
 395 imaging and image post-processing and quantification. We have demonstrated its  
 396 applicability in adult mouse organs through a range staining and quantification approaches.  
 397 Further improvements to MF-HREM are possible in several areas of the imaging pipeline.



398 The resin embedding and staining protocol can be improved by optimisation to a specific  
399 biological problem, e.g. a custom mould can be used for staining where the orientation and  
400 organ are the same for a large number of samples. Additionally, whilst dehydration and  
401 embedding times cannot be easily decreased without compromising the final imaging,  
402 automation of the process using an automated histological sample processor could improve  
403 consistency and enable faster protocol optimisation for a specific application.  
404 Despite the increased stain penetration with saponin treatment, difficulties in segmentation  
405 remain primarily due to inhomogeneous staining. Diffusion staining alone will always  
406 struggle to achieve homogenous stain penetration in a timely manner but the use of smaller  
407 staining molecules such as nanobodies (2) or the use of genetically encoded reporters such  
408 as SNAP-CLIP (55), may improve this. Making more use of i.v. staining routes could vastly  
409 decrease the time needed for overall sample preparation, however, the large volumes of  
410 stain needed for these approaches may be a limiting factor (2).  
411 Solving the shine-through artefact is a key challenge for MF-HREM and we have  
412 demonstrated two approaches: the inclusion of Orasol Black to physically limit light  
413 transmission thorough the sample; and deconvolution using a half zeroed PSF, generated  
414 from measurement of the sample stack.

415 Our post-processing method to remove shine-through provides a sample specific  
416 PSF, whilst circumventing the problem of poor signal-to-noise that would occur if PSF's were  
417 used directly from the image stack. It removes the onerous and impractical requirement to  
418 measure the PSF using sub resolution beads for each sample, as wavelength, staining,  
419 tissue autofluorescence and many other features are likely to change for each sample.  
420 Our method provides a fast and easy to implement alternative that can be effective, as  
421 shown in our application to brain and tumour microvasculature.  
422 To aid in deconvolution and segmentation, other image-processing approaches such as  
423 spectral unmixing (to remove contributions due to spectral overlap in multichannel imaging)  
424 and background subtraction via rolling-ball algorithm (to reduce background  
425 autofluorescence) were found to improve signal-to-noise ratio, ultimately enabling  
426 deconvolution and segmentation. The optimisation of the deconvolution itself is an area that  
427 could benefit from further optimisation. In this first instance of MF-HREM use we have used  
428 the widely-adopted Richardson-Lucy algorithm with no additional constraints to aid in  
429 regularisation, such as a Total-Variation Richardson-Lucy approach, and settled on iteration  
430 number via our ability to further segment the data. A fuller investigation into all the  
431 parameters and models for deconvolution could further improve and aid in the wider  
432 adoption of MF-HREM. In order to make this possible, where specialised post-processing  
433 and segmentation algorithms were used, all were from open source software platforms  
434 (36,41).

435 Three-dimensional (3D) optical microscopy has been the focus of a substantial body  
436 of research, with several new technologies coming to prominence in recent years. This has  
437 enabled numerous new biological insights to be made in neuroscience, developmental  
438 biology, cancer and immunology (2,6,8,12).

439 Despite the obvious utility of large-volume, high-resolution 3D optical microscopy,  
440 there remain many challenges. Clearing protocols can often be complex and lengthy, and  
441 the technicality of serial sectioning instruments as well as the long imaging times limit their  
442 widespread adoption (3,12). All of these factors cause delays in optimising new protocols,  
443 restricts studies to small group sizes and often require specialised imaging facilities. This  
444 has created a bottleneck in answering the plethora of potentially important scientific  
445 questions which could benefit from 3D imaging.

446 Making large volume high resolution 3D imaging widely available will create faster progress  
447 on a range of biological questions and will result in protocols and biological conclusions that  
448 are more robust.

449 In this study, we have developed a pipeline for performing MF-HREM, which enables  
450 three-dimensional, multiplexed fluorescence imaging of large tissue samples ( $> 0.5 \text{ cm}^3$ ), at  
451 high resolution. MF-HREM is a block-facing technique, using a commercially available  
452 system (Optical HREM, Indigo Scientific, UK), that overcomes shine-through with a  
453 combination of a resin opacifying agent (Orasol Black) and image deconvolution. This  
454 technique could find wide application through its avoidance of optical sectioning, tissue  
455 clearing or the need for a custom built instrument.

## 456 **Methods**

### 457 **Animal models**

458 All animal studies were licensed under the UK Home Office regulations and the Guidance for  
459 the Operation of Animals (Scientific Procedures) Act 1986 (Home Office, London, United  
460 Kingdom) and United Kingdom Co-ordinating Committee on Cancer Research Guidelines for  
461 the Welfare and Use of Animals in Cancer Research (56)

462

### 463 **Perfuse fixation**

464 All animals were euthanized via i.p. injection of  $100 \text{ mg kg}^{-1}$  sodium pentobarbital  
465 (Animalcare, Pentject) diluted in 0.1 ml phosphate buffered saline (PBS). Once anaesthesia  
466 was confirmed, surgical procedures for cardiac perfusion were performed for systemic  
467 clearance of blood. Heparinized saline (20ml) ( $0.2 \text{ ml}$ , with  $1,000 \text{ IU ml}^{-1}$ , maintained at  
468  $37^\circ \text{C}$ ) was administered with a perfusion pump (Watson Marlow, 5058) at a flow rate of  
469  $3 \text{ ml min}^{-1}$  to mimic normal blood flow. After the complete drainage of blood, mice were  
470 perfused with 20 ml of 4% paraformaldehyde (PFA, VWR chemicals  $4^\circ \text{C}$ ). Organs were then  
471 removed and fixed for 2-24h in 4% PFA at  $4^\circ \text{C}$ .

472

### 473 **Murine tumour xenograft model**

474 Eight- to ten-week-old, female, immune-compromised nu/nu nude mice (background CD1)  
475 were used (Charles River Laboratories). Cells from the FaDu human breast cancer cell line  
476 (gifted from Dr Craig Murdoch (Sheffield University)) were cultured in complete medium  
477 (Dulbecco's minimum essential medium Eagle with L-glutamine (DMEM) (Lonza) + 10% fetal  
478 bovine serum (Invitrogen)) in the ratio 1:10 (vol/vol) and incubated at  $37^\circ \text{C}$  and 5%  $\text{CO}_2$ . To  
479 prepare for injection, cells were washed with Dulbecco's phosphate buffered saline and  
480 detached with trypsin-EDTA (7–8 min,  $37^\circ \text{C}$ , 5%  $\text{CO}_2$ ) (Sigma). Cells were labelled with  
481 CMDil (Thermofisher UK). Stain was dissolved from stock concentration ( $1 \text{ mg/ml}$  in Ethanol)  
482 in D-PBS to a working solution of  $1 \mu\text{M}$ . Cells were incubated in the working solution for 5  
483 minutes at  $37^\circ \text{C}$ , and then for 15 minutes at  $4^\circ \text{C}$ . Cells were then washed and re-suspended  
484 in PBS for injection. A  $100 \mu\text{l}$  bolus of  $1 \times 10^6$  cells was injected subcutaneously into the left  
485 flank above the hind leg of each mouse (N=5), Non-prestained cells were injected into the  
486 right flank. Tumour growth was measured daily with callipers, every day after tumour  
487 became palpable, and were grown until total tumour volume was  $1500 \text{ mm}^3$  or three weeks  
488 post-injection has elapsed.

489 For blood vessel staining, 200  $\mu$ l Lectin (*Tomato*) bound to DyeLyte-649 (Vector UK) (1  
490 mg/ml) was administered via tail vein injection and allowed to circulate for 10 minutes before  
491 perfusion fixation to allow sufficient binding to the vascular endothelium (8).

492

### 493 **Stain penetration**

494 A variety of mice which had not had procedures that would affect this experiment (e.g. mice  
495 with failed subcutaneous tumour induction or those that had been used for MRI sequence  
496 tests) were used in order to reduce the number of animals used. All mice were between 10-  
497 23 weeks old. They were perfused fixed as above and both kidneys were removed. Each  
498 animal was randomly assigned to one of the four groups (saponin, freeze-thaw, iDISCO and  
499 proteinase [K] digestion) and for each animal one kidney was randomly assigned to  
500 treatment and the contralateral kidney retained as a matched control. In the saponin,  
501 iDISCO and proteinase [K] groups, the control kidney was maintained in PBS and at the  
502 same temperature as the treated kidney. For the freeze-thaw group, the control kidney was  
503 dehydrated and rehydrated through the same methanol series but with no freeze-thaw  
504 cycles applied.

505 Freeze-Thaw: Kidneys were dehydrated through a methanol in dH<sub>2</sub>O series: 20%,  
506 40%, 60%, 80%, 100% for 1 hr in each (7ml per kidney). Kidneys were freeze-thawed 3  
507 times for 20 mins each time at -80 °C. Kidneys were then rehydrated through methanol  
508 series 80%,60%,40%,20% ,0% (1 hr each).

509 iDISCO: Kidneys were washed in PTX.2 1hr two times at room temp. Kidneys were  
510 incubated overnight at 37°C in a solution containing 1xPBS, 0.2% Triton-X (Sigma UK), 20%  
511 DMSO (Sigma UK). Kidneys were then incubated overnight at 37°C in a solution of 1xPBS,  
512 0.1% Tween-20 (Sigma UK), 0.1% Triton-X, 0.1% Deoxycholate (Sigma UK), + 0.1% NP40  
513 (Sigma UK), 20% DMSO.

514 P[K]: Tris Buffer containing 1.21 g Tris (Sigma UK), 0.147 g CaCl<sub>2</sub>.H<sub>2</sub>O, (Sigma UK),  
515 65 ml dH<sub>2</sub>O, 30 ml glycerol (Sigma UK) was made and 40  $\mu$ g/mL proteinase [K] (Sigma UK)  
516 was added. The sample was incubated at room temp for 10 mins, with constant agitation  
517 before being washed on PBS x3 for 10 mins each.

518 Saponin: A solution containing 2 g of gelatin (VWR) in 1 L PBS was made and  
519 filtered immediately. After allowing the solution to chill, 5 mL of Triton X-100, 0.1 g of sodium  
520 azide (Sigma UK) and 10 mg/ml saponin (Sigma UK) was added to the solution. Kidneys  
521 were incubate for (72 hrs) in 3 ml of solution (PBS for control kidneys) at room temp. with  
522 constant agitation.

523 After treatment, all kidneys were stained for 94 hrs in HCS Nuclear mask (Thermo  
524 Fisher UK) in 40  $\mu$ l/10ml PBS at room temperature and with constant agitation.

525

### 526 **Spectroscopy**

527 The transmission spectrum of Orasol Black was measured using an HG4000CG-UV-NIR  
528 (Ocean Optics) fibre-fed spectrometer. Samples of Technovit 8100 base sol. plus catalyst 1,  
529 with a low concentration (0.1 mg/mL) of Orasol Black, were measured in a PMMA semi-  
530 micro cuvette over a 4 mm path length, from 350 nm to 95 nm with a QTH10/M (Thorlabs)  
531 continuum lamp. The transmission spectrum (Figure 3) has been compensated for the  
532 cuvette reflectivity and PMMA absorption.

533

### 534 **3D standard cell culture samples**

535 Compressed type I collagen hydrogels (RAFT UK) were used as standardized samples for  
536 testing stain compatibility with tissue processing and for quantification of shine-through.  
537 Samples were prepared in a 24 wellplate using the protocol described by the manufacturer,  
538 with the addition of SW1222 colorectal cancer cells at 100,000 cells/mL (57). Samples were  
539 fixed with 4% PFA for 20 mins. Post-fixation, cell nuclei were stained with the addition of  
540 HCS nuclear mask deep red 2  $\mu\text{L}/\text{mL}$  in PBS incubated for 30 mins. Samples were then  
541 processed for MF-HREM as described in Table 1.

542

### 543 **Resin testing**

544 Multiple candidate resins were tested for setting time, compatibility with opacifying agents  
545 final block hardness and quality of cut. Resins used were Technovit 7100 (Heraeus Kulzer,  
546 Germany), Technovit 8100 (Heraeus Kulzer, Germany), Spurr resin (Polysciences Inc,  
547 USA), LR White (Sigma-Aldrich, USA) and Lowicryl HM20 (Polysciences Inc, USA).  
548 Technovit 7100 is a 2-hydroxyethyl methacrylate-based plastic resin, and was prepared  
549 using 1 g Technovit 7100 hardener 1 dissolved in 100 mL Technovit 7100 resin. Technovit  
550 7100 hardener 2 was used to catalyze the polymerisation reaction, added in a ratio of 1:15  
551 Hardener 2 to resin.

552 Technovit 8100 had a similar composition: 0.5 g of Technovit 8100 Hardener 1  
553 dissolved in 100 mL Technovit 8100 resin. The catalyst, Technovit 8100 Hardener 2, was  
554 added in a ratio of 1:30 catalyst to resin.

555 Spurr is an epoxy resin, and was prepared using 4.1 g ERL, 1.43 g diglycidyl ether of  
556 polypropylene glycol, 5.9 g nonenylsuccinic anhydride and 0.1 g dimethylaminoethanol  
557 accelerator.

558 LR White is an acrylic resin and was prepared using 2 g benzoyl peroxide  
559 accelerator per 100 mL resin.

560 Lowicryl HM20, a methacrylate resin, was prepared with 0.6% (w/w) benzoyl peroxide  
561 accelerator.

562 Hardness testing was conducted on blocks after they had set using either a Shore  
563 durometer D or Shore durometer A. Cut quality was assessed by imaging a block with a  
564 mouse kidney embedded using Optical HREM (Indigo Scientific, UK) and counting the  
565 number of slices which had areas of flaky resin or voids.

566

### 567 **Image post-processing and analysis**

568 Image analysis was carried out using a combination of ImageJ (Fiji distribution)(36), Vaa3D  
569 (40–42), Python and Amira.

570

### 571 **Shine-through analysis**

572 Shine through analysis was performed in Fiji and Matlab as follows:

573 Gel image stacks were down-sampled in xy to create isotropic voxels, background  
574 subtraction using rolling-ball algorithm with 50 pxl radius, and sliding parabola was used to  
575 remove autofluorescent background. Image stacks were resliced into xz stacks. Single  
576 isolated cells were manually found in the stack and an ROI was drawn to fully enclose all  
577 pixels with intensity above the background. The intensity profile of the ROI was calculated by  
578 averaging the intensity over the ROI columns (z-direction). This average signal was  
579 truncated at the maximum intensity and fit to a single exponential model in Matlab using a

580 non-linear least squares approach, with start values of 0.5 for  $I_0$  and  $\tau$  and limits of  $\pm \infty$  (other  
581 start values were checked and no difference to final fit parameters was found).

582

### 583 **Post processing of image stacks:**

584 Spectral unmixing was performed via the Fiji plugin as per the documentation (58).

585 Background subtraction was performed using a rolling-ball algorithm with sliding parabola  
586 using a window size dependent on the smallest features of interest in the image stack.

587 Median filtering was performed using the 3D Median filter plugin in Fiji with 1 pxl window size  
588 (36).

589 Fitting of a manually extracted PSF to the model was performed in Matlab using the  
590 fitting tool box for the case of Gaussian fits. For diffraction kernel PSFs (higher magnification  
591 images) FWHM (x,y,z) were measured in the extracted PSFs. To provide a measure of the  
592 lateral spread of the PSF the area of the diffraction pattern in the xy plane t two z slices were  
593 divided by one another. The first z slice was at the FWHM (z), the second slice was the z  
594 slice just before the abrupt change to zero, (i.e. the comet end of the comet-tail artefact).  
595 This is the ratio top/bottom used in DeconvolutionLab (59) to parameterise a variety of their  
596 synthetic PSFs).

597 The diffraction limited PSF was then generated using ImageJ ops (60) from  
598 microscope and sample parameters: sample refractive index  $RI_{\text{sample}} = 1.5$  for the sample  
599 (refractive index of Technovit 8100),  $RI_{\text{immersion}} = 1.0$ , NA of 0.25, offset 0  $\mu\text{m}$  working  
600 distance 150  $\mu\text{m}$  (default), xy spacing- dependent on sample pixel size, z spacing -  
601 dependent on cut thickness, wavelength – sample dependent. This PSF was measured as  
602 above and small (50 nm) manual variation in wavelength was used to iteratively optimise the  
603 PSF to match the sample.

604 Once a PSF was synthetically generated at the same size as the image stack to be  
605 deconvolved the PSF was zeroed in the lower half and background subtracted (pixel  
606 intensities less than 0.001 in 32 bit images were zeroed). This PSF was then used in the RL  
607 deconvolution algorithm of ImageJ ops using a border size of  $\frac{1}{4}$  the image size in each  
608 dimension respectively. Iteration number was tested for each sample and 20 iterations for  
609 high magnification to produce adequate deconvolution without noise enhancement. For  
610 lower magnification samples 35 iterations was necessary to produce adequate  
611 deconvolution and prevent noise enhancement.

612

### 613 **Kidney Glomeruli segmentation:**

614 Vessel tracing was performed in Vaa3D Gradient Vector Flow algorithm (40–42), with  
615 diffusion iteration of 5. Connected component analysis was performed in Amira with a  
616 threshold minimum size of 10000  $\mu\text{m}^3$  based on literature estimates for glomeruli (43). No  
617 deconvolution was necessary owing to the size of the structures being imaged, by  
618 comparison to the pixel size.

619

### 620 **Tumour vasculature segmentation:**

621 Tumour images used Gaussian PSF's for deconvolution with parameters of  $\sigma_x = \sigma_y =$   
622 4 and  $\sigma_z = 80$  for the Lectin-Dyelight649 channel and  $\sigma_x = \sigma_y = 4$  and  $\sigma_z = 40$  for the CMDil  
623 channel. Both used 35 iterations of the Richardson-Lucy deconvolution.

624 For tumour vasculature following deconvolution, vascular segmentation was  
625 performed using the APP2 algorithm of Vaa3D described previously (40–42,45). Parameter  
626 values were Threshold =1(auto thresholding), CNN=3, GSBT was used and other  
627 parameters were used at their default values.

628

## 629 **Brain Structures:**

630 Brain microvasculature was deconvolved using a diffraction kernel with parameters specified  
631 above including xy pixel size of 570  $\mu\text{m}$  and z pixel size of 1720  $\mu\text{m}$  and wavelength of 700  
632 nm. Segmentation was in Vaa3D via the MOST tracing algorithm ,(40–42,48) using a  
633 threshold determined by Otsu threshold of 20, seed size 6 and slip size 20. White matter  
634 orientation analysis was performed using the OrientationJ plugin of Fiji with a Gaussian  
635 gradient and kernel sizes of 8 or 4 for Figures 8D and 8E respectively. HSB images were  
636 created with orientation, coherence and original image brightness as the three channels  
637 respectively.

638

## 639 **HREM imaging**

640 All MF-HREM imaging is carried out using the Optical-HREM instrument (Indigo Scientific,  
641 UK). Samples are mounted into the instrument and initially the block are sectioning without  
642 imaging to ensure a block surface exactly perpendicular to the optical axis. Once a flat  
643 surface is achieved, the desired slice thickness, x,y resolution, focus, total imaging depth,  
644 and exposure and gain for each wavelength are set. An air blower and vacuum are  
645 positioned to remove serial slices as they are sectioned. Imaging then proceeds in a fully  
646 automated manner until the total imaging depth has been achieved.

647

## 648 **Acknowledgements**

649 We would like to thank Craig Murdoch for the kind gift of the FaDu cell line.

650

## 651 **Competing Interests**

652 The authors have no competing interests to declare

## 653 **References**

- 654 1. Hildebrand DGC, Cicconet M, Torres RM, Choi W, Quan TM, Moon J, et al. Whole-  
655 brain serial-section electron microscopy in larval zebrafish. *Nature*. Nature Publishing  
656 Group; 2017;545(7654):345.
- 657 2. Cai R, Pan C, Ghasemigharagoz A, Todorov MI, Förstera B, Zhao S, et al. Panoptic  
658 imaging of transparent mice reveals whole-body neuronal projections and skull-  
659 meninges connections. *Nat Neurosci*. 2019;22(2):317–27.
- 660 3. Abdeladim L, Matho KS, Clavreul S, Mahou P, Sintes J-M, Solinas, Xavier Arganda-  
661 Carreras I, et al. Multicolor multiscale brain imaging with chromatic multiphoton serial  
662 microscopy. *Nat Commun*. Springer US; 2019;in press.
- 663 4. Liebmann T, Renier N, Bettayeb K, Greengard P, Tessier-Lavigne M, Flajolet M.  
664 Three-dimensional study of Alzheimer's disease hallmarks using the iDISCO clearing  
665 method. *Cell Rep*. Elsevier; 2016;16(4):1138–52.
- 666 5. Stack EC, Wang C, Roman KA, Hoyt CC. Multiplexed immunohistochemistry,  
667 imaging, and quantitation: a review, with an assessment of Tyramide signal  
668 amplification, multispectral imaging and multiplex analysis. *Methods*. Elsevier;  
669 2014;70(1):46–58.
- 670 6. Renier N, Wu Z, Simon DJ, Yang J, Ariel P, Tessier-Lavigne M. iDISCO: a simple,  
671 rapid method to immunolabel large tissue samples for volume imaging. *Cell*. United  
672 States; 2014 Nov;159(4):896–910.
- 673 7. Voigt FF, Kirschenbaum D, Platonova E, Pagès S, Campbell RAA, Kastli R, et al. The

- 674 mesoSPIM initiative: open-source light-sheet microscopes for imaging cleared tissue.  
675 Nat Methods. 2019;
- 676 8. d'Esposito A, Sweeney PW, Ali M, Saleh M, Ramasawmy R, Roberts TA, et al.  
677 Computational fluid dynamics with imaging of cleared tissue and of in vivo perfusion  
678 predicts drug uptake and treatment responses in tumours. Nat Biomed Eng.  
679 2018;2(10):773–87.
- 680 9. d'Esposito A, Nikitichev D, Desjardins A, Walker-Samuel S, Lythgoe MF.  
681 Quantification of light attenuation in optically cleared mouse brains. J Biomed Opt.  
682 United States; 2015 Aug;20(8):80503.
- 683 10. Gleave JA, Lerch JP, Henkelman RM, Nieman BJ. A Method for 3D Immunostaining  
684 and Optical Imaging of the Mouse Brain Demonstrated in Neural Progenitor Cells.  
685 PLoS One. Public Library of Science; 2013 Aug 6;8(8):e72039.
- 686 11. Roberts TA, Hyare H, Agliardi G, Hipwell B, d'Esposito A, Ianus A, et al.  
687 Quantitation of brain tumour microstructure response to Temozolomide therapy using  
688 non-invasive VERDICT MRI. bioRxiv. 2017 Jan 1;
- 689 12. Vigouroux RJ, Belle M, Chédotal A. Neuroscience in the third dimension: Shedding  
690 new light on the brain with tissue clearing. Mol Brain. Molecular Brain; 2017;10(1):1–  
691 10.
- 692 13. Zheng T, Feng Z, Wang X, Jiang T, Jin R, Zhao P, et al. Review of micro-optical  
693 sectioning tomography (MOST): technology and applications for whole-brain optical  
694 imaging. Biomed Opt Express. Optical Society of America; 2019;10(8):4075–96.
- 695 14. Amato SP, Pan F, Schwartz J, Ragan TM. Whole Brain Imaging with Serial Two-  
696 Photon Tomography. Front Neuroanat. 2016;10(March):1–11.
- 697 15. Krishnamurthi G, Wang CY, Steyer G, Wilson DL. Removal of subsurface  
698 fluorescence in cryo-imaging using deconvolution. Opt Express. Optical Society of  
699 America; 2010 Oct 7;18(21):22324–38.
- 700 16. Seiriki K, Kasai A, Nakazawa T, Niu M, Naka Y, Tanuma M, et al. Whole-brain block-  
701 face serial microscopy tomography at subcellular resolution using FAST. Nat Protoc.  
702 Springer US; 2019;14(5):1509–29.
- 703 17. Gong H, Xu D, Yuan J, Li X, Guo C, Peng J, et al. High-throughput dual-colour  
704 precision imaging for brain-wide connectome with cytoarchitectonic landmarks at the  
705 cellular level. Nat Commun. Nature Publishing Group; 2016;7:1–12.
- 706 18. Anderson RH, Brown NA, Mohun TJ. Insights regarding the normal and abnormal  
707 formation of the atrial and ventricular septal structures. Clin Anat. United States; 2016  
708 Apr;29(3):290–304.
- 709 19. Captur G, Wilson R, Bennett MF, Luxan G, Nasis A, de la Pompa JL, et al.  
710 Morphogenesis of myocardial trabeculae in the mouse embryo. J Anat. England; 2016  
711 Aug;229(2):314–25.
- 712 20. Mohun TJ, Wenginger WJ. Embedding embryos for high-resolution episcopic  
713 microscopy (HREM). Cold Spring Harb Protoc. 2012;7(6):678–80.
- 714 21. Wenginger WJ, Geyer SH, Mohun TJ, Rasskin-Gutman D, Matsui T, Ribeiro I, et al.  
715 High-resolution episcopic microscopy: a rapid technique for high detailed 3D analysis  
716 of gene activity in the context of tissue architecture and morphology. Anat Embryol  
717 (Berl). Germany; 2006 Jun;211(3):213–21.
- 718 22. Geyer SH, Nöhammer MM, Tinhofer IE, Wenginger WJ. The dermal arteries of the  
719 human thumb pad. J Anat. 2013;223(6):603–9.
- 720 23. Matsui H, Ho SY, Mohun TJ, Gardiner HM. Postmortem high-resolution episcopic  
721 microscopy (HREM) of small human fetal hearts. Ultrasound in obstetrics &  
722 gynecology : the official journal of the International Society of Ultrasound in Obstetrics

- 723 and Gynecology. England; 2015. p. 492–3.
- 724 24. Rosenthal J, Mangal V, Walker D, Bennett M, Mohun TJ, Lo CW. Rapid high  
725 resolution three dimensional reconstruction of embryos with episcopic fluorescence  
726 image capture. *Birth Defects Res Part C Embryo Today Rev. Wiley Online Library*;  
727 2004;72(3):213–23.
- 728 25. Wenginger WJ, Mohun TJ. Three-dimensional analysis of molecular signals with  
729 episcopic imaging techniques. *Methods Mol Biol. United States*; 2007;411:35–46.
- 730 26. Tainaka K, Murakami TC, Susaki EA, Shimizu C, Saito R, Takahashi K, et al.  
731 Chemical landscape for tissue clearing based on hydrophilic reagents. *Cell Rep.*  
732 Elsevier; 2018;24(8):2196–210.
- 733 27. Kim JH, Jang MJ, Choi J, Lee E, Song K--D, Cho J, et al. Optimizing tissue-clearing  
734 conditions based on analysis of the critical factors affecting tissue-clearing  
735 procedures. *Sci Rep. Nature Publishing Group*; 2018;8(1):1–11.
- 736 28. Chee Tak Yeung E. *Plant Microtechniques and Protocols*.
- 737 29. Marion J, Le Bars R, Satiat-Jeunemaitre B, Boulogne C. Optimizing CLEM protocols  
738 for plants cells: GMA embedding and cryosections as alternatives for preservation of  
739 GFP fluorescence in Arabidopsis roots. *J Struct Biol. The Author(s)*; 2017;198(3):196–  
740 202.
- 741 30. Yang Z, Hu B, Zhang Y, Luo Q, Gong H. Development of a Plastic Embedding  
742 Method for Large-Volume and Fluorescent-Protein-Expressing Tissues. *PLoS One.*  
743 2013;8(4):4–8.
- 744 31. Quester R, Knifka J, Schröder R. Optimization of glycol methacrylate embedding of  
745 large specimens in neurological research. Study of rat skull-brain specimens after  
746 implantation of polyester meshes. *J Neurosci Methods*. 2002;113(1):15–26.
- 747 32. Gang Y, Liu X, Wang X, Zhang Q, Zhou H, Chen R, et al. Plastic embedding  
748 immunolabeled large-volume samples for three-dimensional high-resolution imaging.  
749 *Biomed Opt Express. Optical Society of America*; 2017;8(8):3583–96.
- 750 33. Wallace W, Schaefer LH, Swedlow JR. A workingperson's guide to deconvolution in  
751 light microscopy. *Biotechniques. Future Science*; 2001;31(5):1076–97.
- 752 34. de Monvel JB, Scarfone E, Le Calvez S, Ulfendahl M. Image-adaptive deconvolution  
753 for three-dimensional deep biological imaging. *Biophys J. United States*; 2003  
754 Dec;85(6):3991–4001.
- 755 35. Sternberg SR. Biomedical image processing. *Computer (Long Beach Calif). IEEE*;  
756 1983;(1):22–34.
- 757 36. Schindelin J, Arganda-Carreras I, Frise E, Kaynig V, Longair M, Pietzsch T, et al. Fiji:  
758 an open-source platform for biological-image analysis. *Nat Methods. United States*;  
759 2012 Jun;9(7):676–82.
- 760 37. Jafree DJ, Moulding D, Kolatsi-Joannou M, Tejedor NP, Price KL, Milmoie NJ, et al.  
761 Spatiotemporal dynamics and heterogeneity of renal lymphatics in mammalian  
762 development and cystic kidney disease. *Elife. eLife Sciences Publications Limited*;  
763 2019;8:e48183.
- 764 38. Li W, Germain RN, Gerner MY. Multiplex, quantitative cellular analysis in large tissue  
765 volumes with clearing-enhanced 3D microscopy (Ce3D). *Proc Natl Acad Sci. National*  
766 *Academy of Sciences*; 2017;114(35):E7321--E7330.
- 767 39. Baldelomar EJ, Charlton JR, Beeman SC, Hann BD, Cullen-McEwen L, Pearl VM, et  
768 al. Phenotyping by magnetic resonance imaging nondestructively measures  
769 glomerular number and volume distribution in mice with and without nephron  
770 reduction. *Kidney Int. United States*; 2016 Feb;89(2):498–505.
- 771 40. Peng H, Bria A, Zhou Z, Iannello G, Long F. Extensible visualization and analysis for



- 772 multidimensional images using Vaa3D. *Nat Protoc.* England; 2014 Jan;9(1):193–208.
- 773 41. Peng H, Ruan Z, Long F, Simpson JH, Myers EW. V3D enables real-time 3D  
774 visualization and quantitative analysis of large-scale biological image data sets. *Nat*  
775 *Biotechnol.* Nature Publishing Group; 2010;28(4):348.
- 776 42. Peng H, Tang J, Xiao H, Bria A, Zhou J, Butler V, et al. Virtual finger boosts three-  
777 dimensional imaging and microsurgery as well as terabyte volume image visualization  
778 and analysis. *Nat Commun.* 2014;5(1):4342.
- 779 43. Klingberg A, Hasenberg A, Ludwig-Portugall I, Medyukhina A, Männ L, Brenzel A, et  
780 al. Fully Automated Evaluation of Total Glomerular Number and Capillary Tuft Size in  
781 Nephritic Kidneys Using Lightsheet Microscopy. *J Am Soc Nephrol.* American Society  
782 of Nephrology; 2017;28(2):452–9.
- 783 44. Friedl P, Wolf K. Tumour-cell invasion and migration: diversity and escape  
784 mechanisms. *Nat Rev Cancer.* 2003;3(5):362–74.
- 785 45. Xiao H, Peng H. APP2: automatic tracing of 3D neuron morphology based on  
786 hierarchical pruning of a gray-weighted image distance-tree. *Bioinformatics.* England;  
787 2013 Jun;29(11):1448–54.
- 788 46. Magdeldin T, López-Dávila V, Pape J, Cameron GWW, Emberton M, Loizidou M, et  
789 al. Engineering a vascularised 3D in vitro model of cancer progression. *Sci Rep.*  
790 Nature Publishing Group; 2017;7(October 2016):1–9.
- 791 47. Bennett RE, Robbins AB, Hu M, Cao X, Betensky RA, Clark T, et al. Tau induces  
792 blood vessel abnormalities and angiogenesis-related gene expression in P301L  
793 transgenic mice and human Alzheimer's disease. *Proc Natl Acad Sci.*  
794 National Academy of Sciences; 2018;115(6):E1289–E1298.
- 795 48. Ming X, Li A, Wu J, Yan C, Ding W, Gong H, et al. Rapid reconstruction of 3D  
796 neuronal morphology from light microscopy images with augmented rayburst  
797 sampling. *PLoS One.* Public Library of Science; 2013 Dec 31;8(12):e84557–e84557.
- 798 49. Zhang X, Yin X, Zhang J, Li A, Gong H, Luo Q, et al. High-resolution mapping of brain  
799 vasculature and its impairment in the hippocampus of Alzheimer's disease mice. *Natl*  
800 *Sci Rev.* 2019;6(6):1223–38.
- 801 50. Todorov MI, Paetzold JC, Schoppe O, Tetteh G, Efremov V, Völgyi K, et al.  
802 Automated analysis of whole brain vasculature using machine learning. *bioRxiv.* Cold  
803 Spring Harbor Laboratory; 2019;613257.
- 804 51. Jelescu IO, Budde MD. Design and Validation of Diffusion MRI Models of White  
805 Matter. *Front Phys.* 2017;5(November).
- 806 52. Budde MD, Frank JA. Examining brain microstructure using structure tensor analysis  
807 of histological sections. *Neuroimage.* 2012;63(1):1–10.
- 808 53. Alexander DC. Modelling, Fitting and Sampling in Diffusion MRI BT - Visualization  
809 and Processing of Tensor Fields: Advances and Perspectives. In: Laidlaw D, Weickert  
810 J, editors. Berlin, Heidelberg: Springer Berlin Heidelberg; 2009. p. 3–20.
- 811 54. Grussu F, Schneider T, Yates RL, Zhang H, Wheeler-Kingshott CAMG, DeLuca GC,  
812 et al. A framework for optimal whole-sample histological quantification of neurite  
813 orientation dispersion in the human spinal cord. *J Neurosci Methods.* 2016;273:20–  
814 32.
- 815 55. Kohl J, Ng J, Cachero S, Ciabatti E, Dolan M-J, Sutcliffe B, et al. Ultrafast tissue  
816 staining with chemical tags. *Proc Natl Acad Sci.* National Academy of Sciences;  
817 2014;111(36):E3805–E3814.
- 818 56. Workman P, Aboagye EO, Balkwill F, Balmain A, Bruder G, Chaplin DJ, et al.  
819 Guidelines for the welfare and use of animals in cancer research. *Br J Cancer.* Nature  
820 Publishing Group; 2010;102(11):1555–77.

- 821 57. Lonza. RAFT 3D cell culture kit protocol [Internet]. [cited 2020 Mar 7]. Available from:  
822 [https://bioscience.lonza.com/lonza\\_bs/CH/en/raft-3d-cell-culture](https://bioscience.lonza.com/lonza_bs/CH/en/raft-3d-cell-culture)
- 823 58. Walter J. Spectral Unmixing Plugin. imageJ; 2006.
- 824 59. Sage D, Donati L, Soulez F, Fortun D, Schmit G, Seitz A, et al. DeconvolutionLab2:  
825 An open-source software for deconvolution microscopy. *Methods*. 2017;115:28–41.
- 826 60. Rueden, C., Dietz, C., Horn, M., Schindelin, J., Northan, B., Berthold, M. & Eliceiri K  
827 (2016). ImageJ Ops. 2016.
- 828
